# Supplementary material
Source: bioRxiv or medRxiv preprint supplement (https://www.biorxiv.org/highwire/filestream/23330/field_highwire_adjunct_files/6/083931-15.pdf)

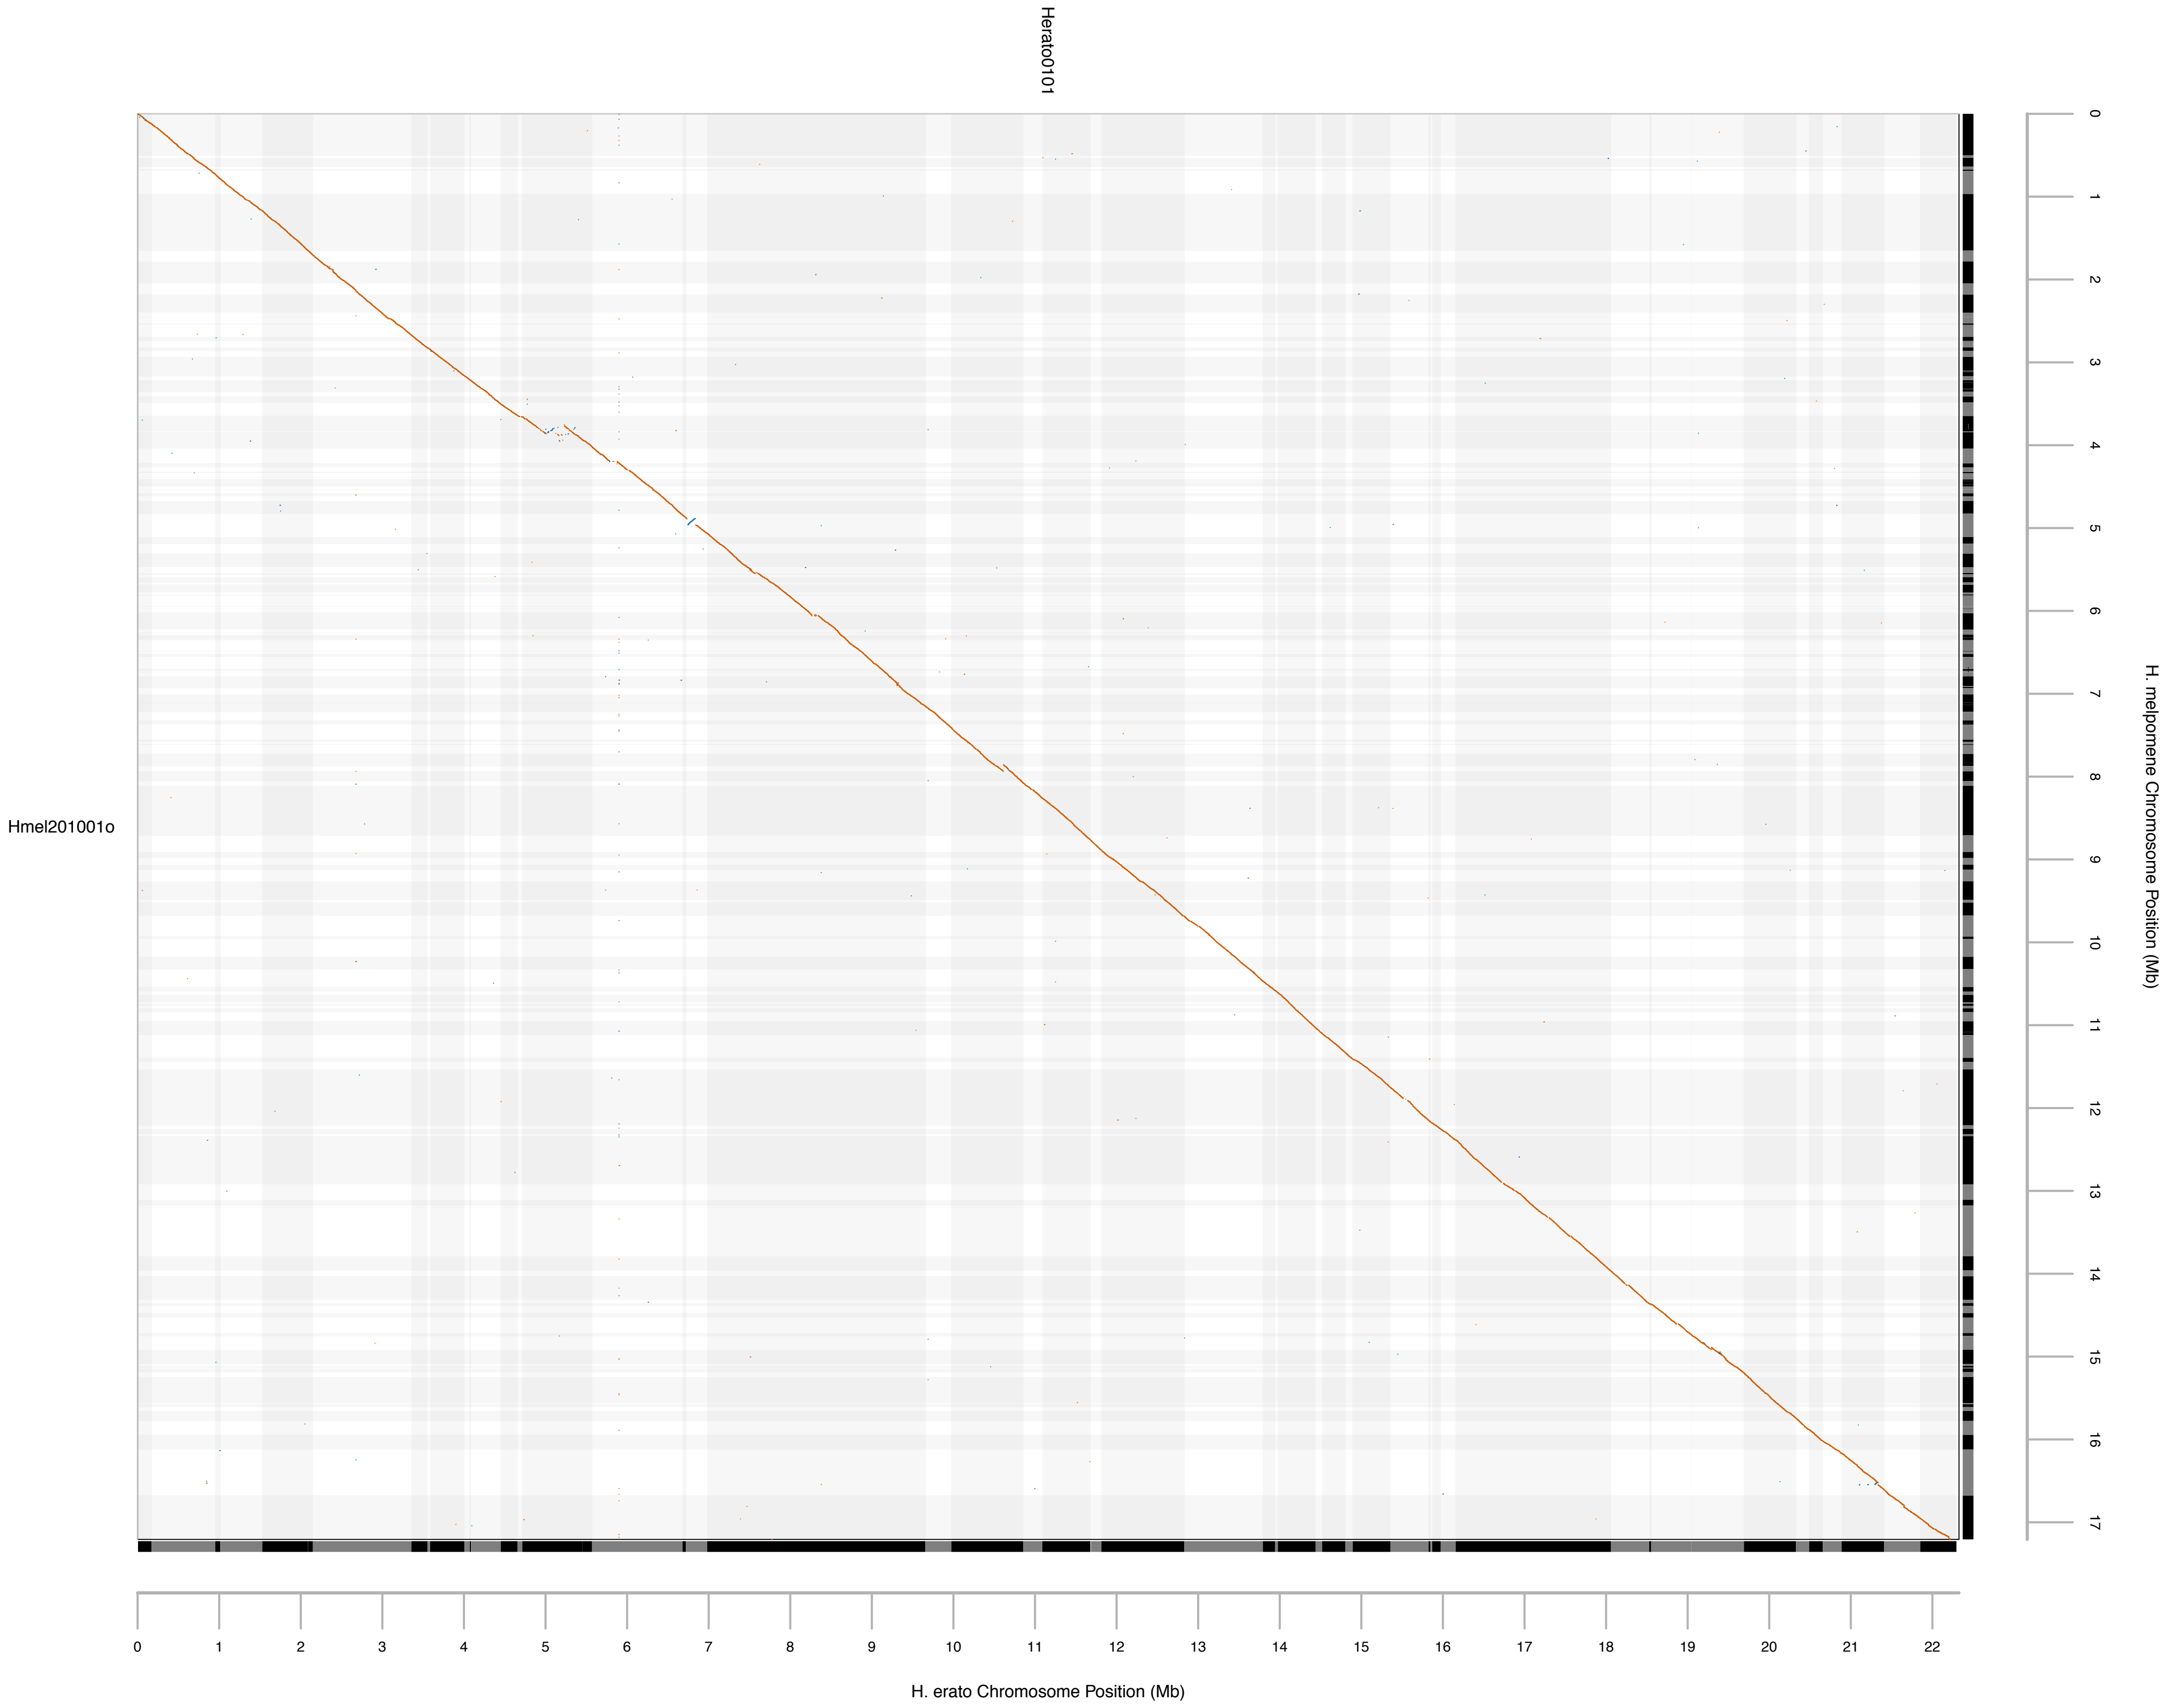

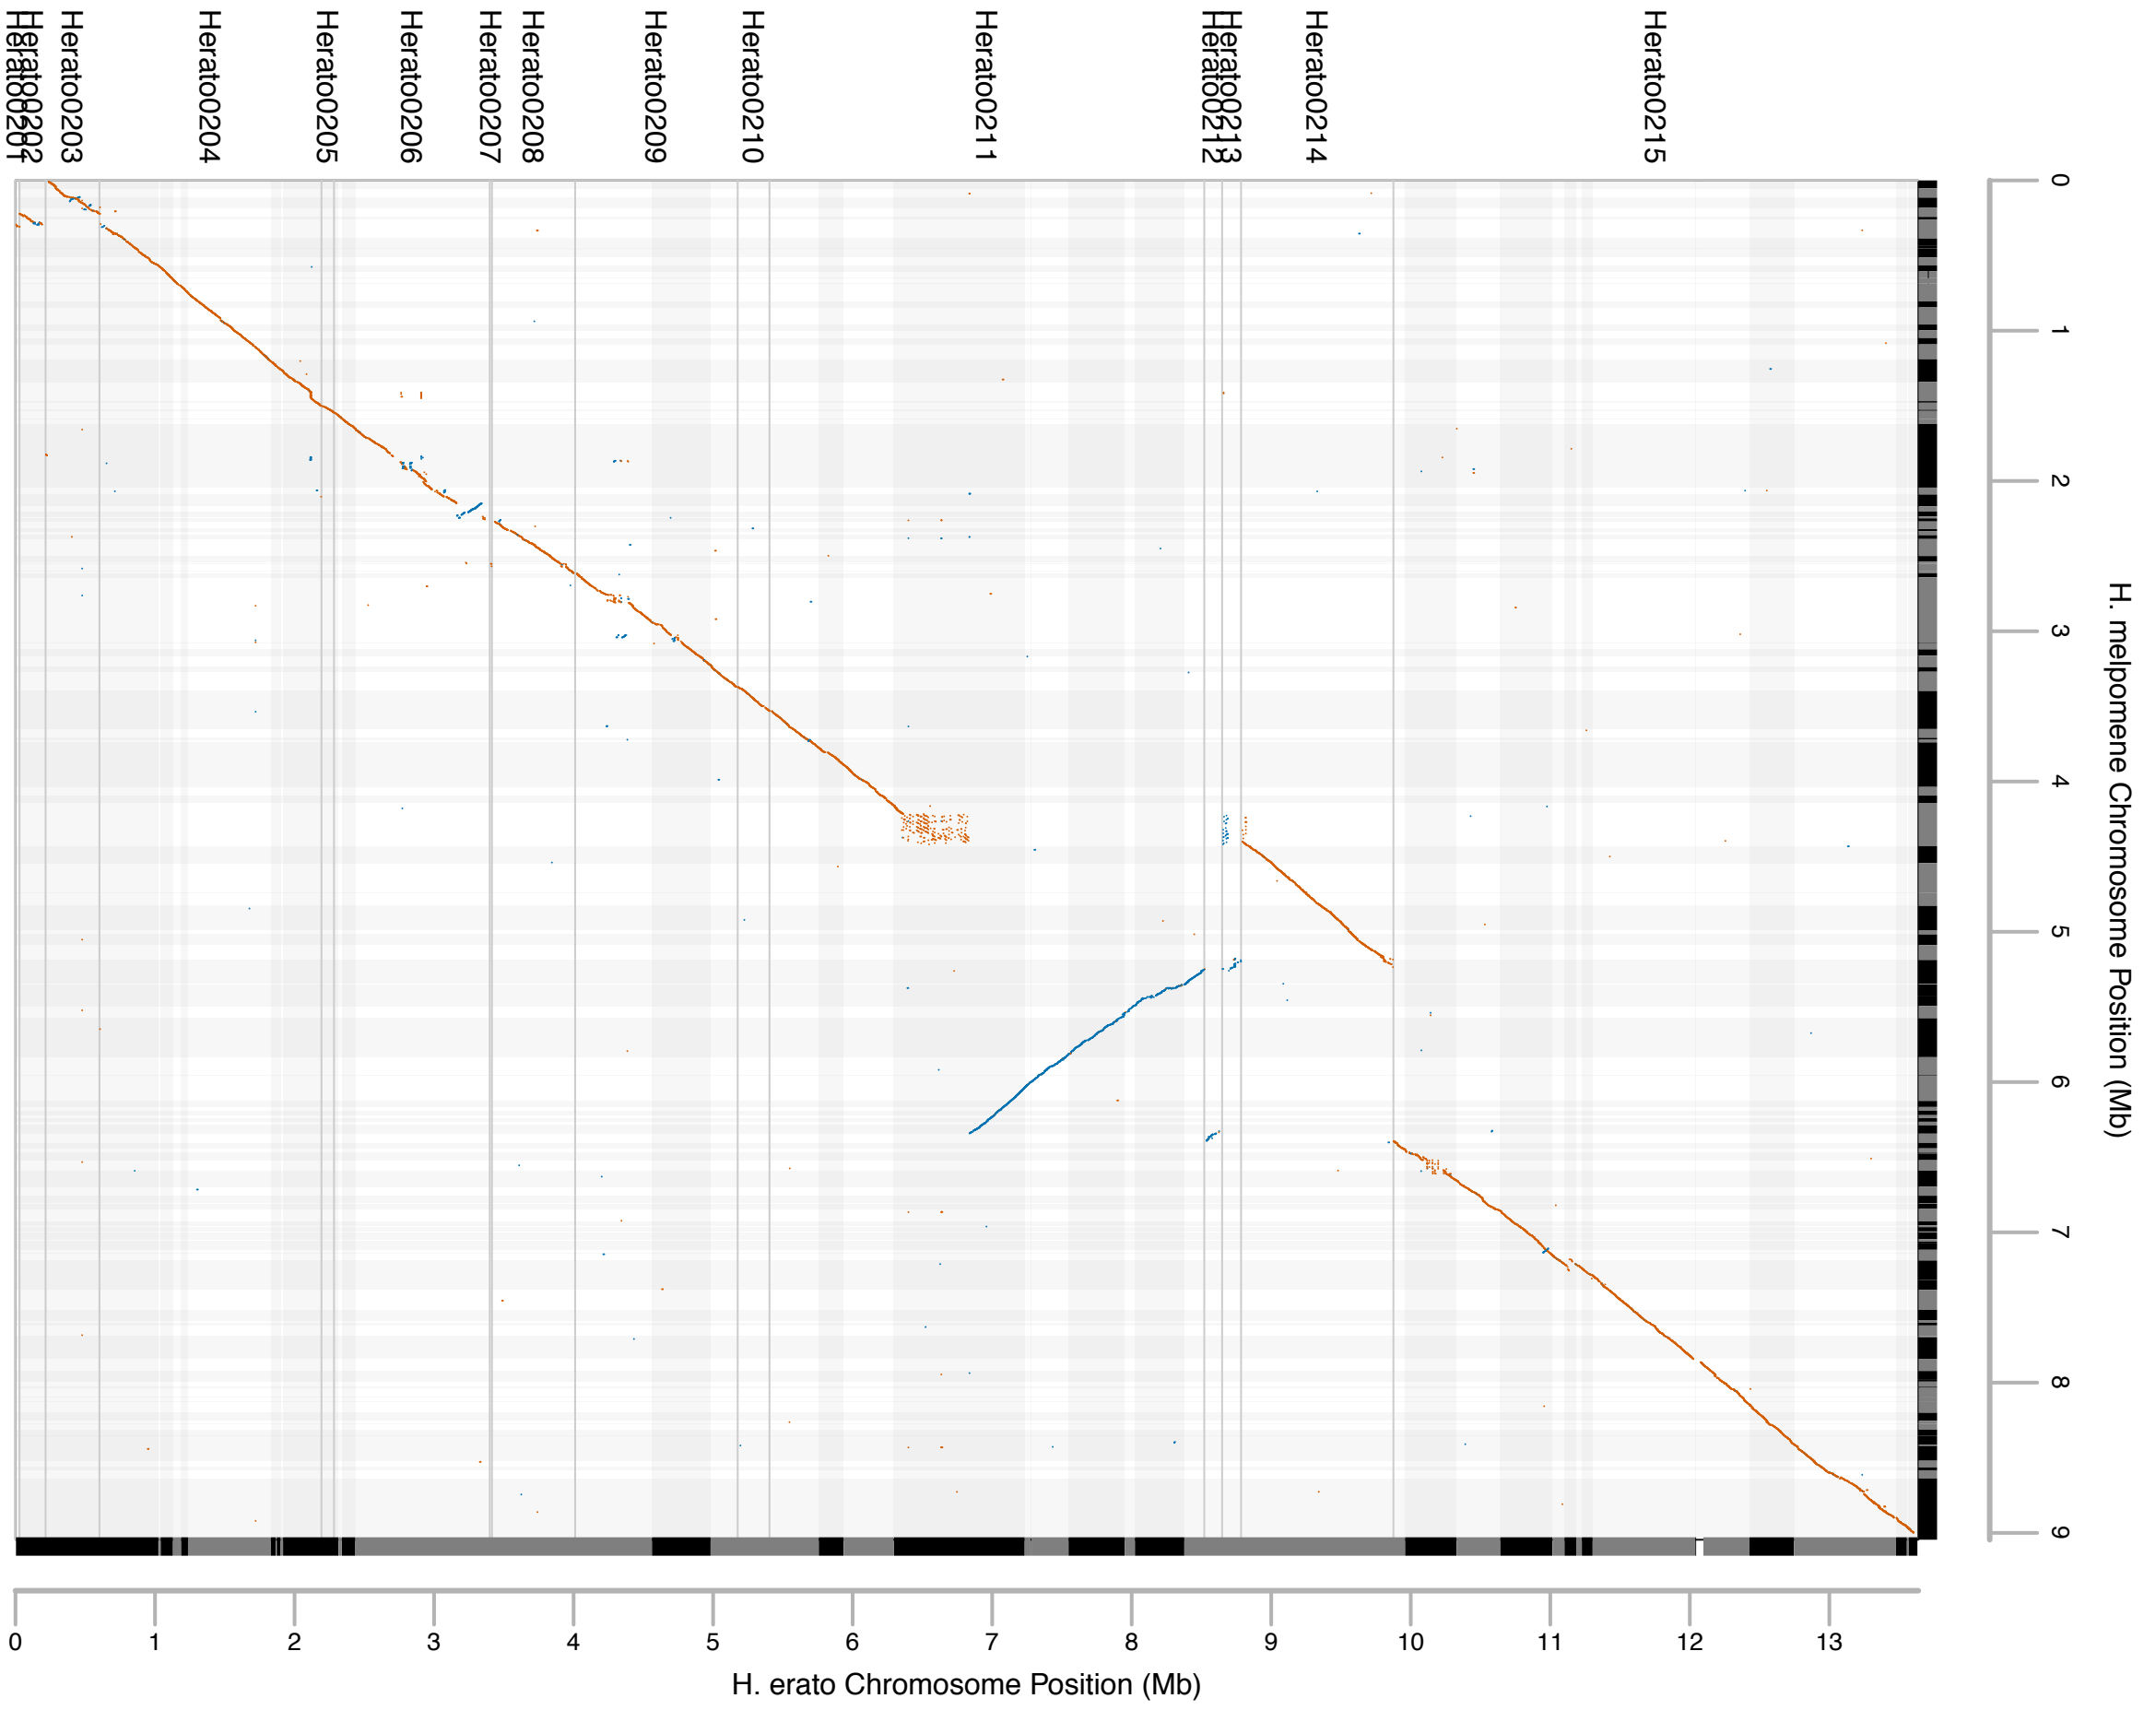

Hmel202001o

H. melpomene Chromosome Position (Mb)

H. erato Chromosome Position (Mb)

Hmel203002o

Hmel203003o

Herato0301

Herato0302  
Herato0303  
Herato0304  
Herato0305  
Herato0306  
Herato0307  
Herato0308  
Herato0309

Herato0310

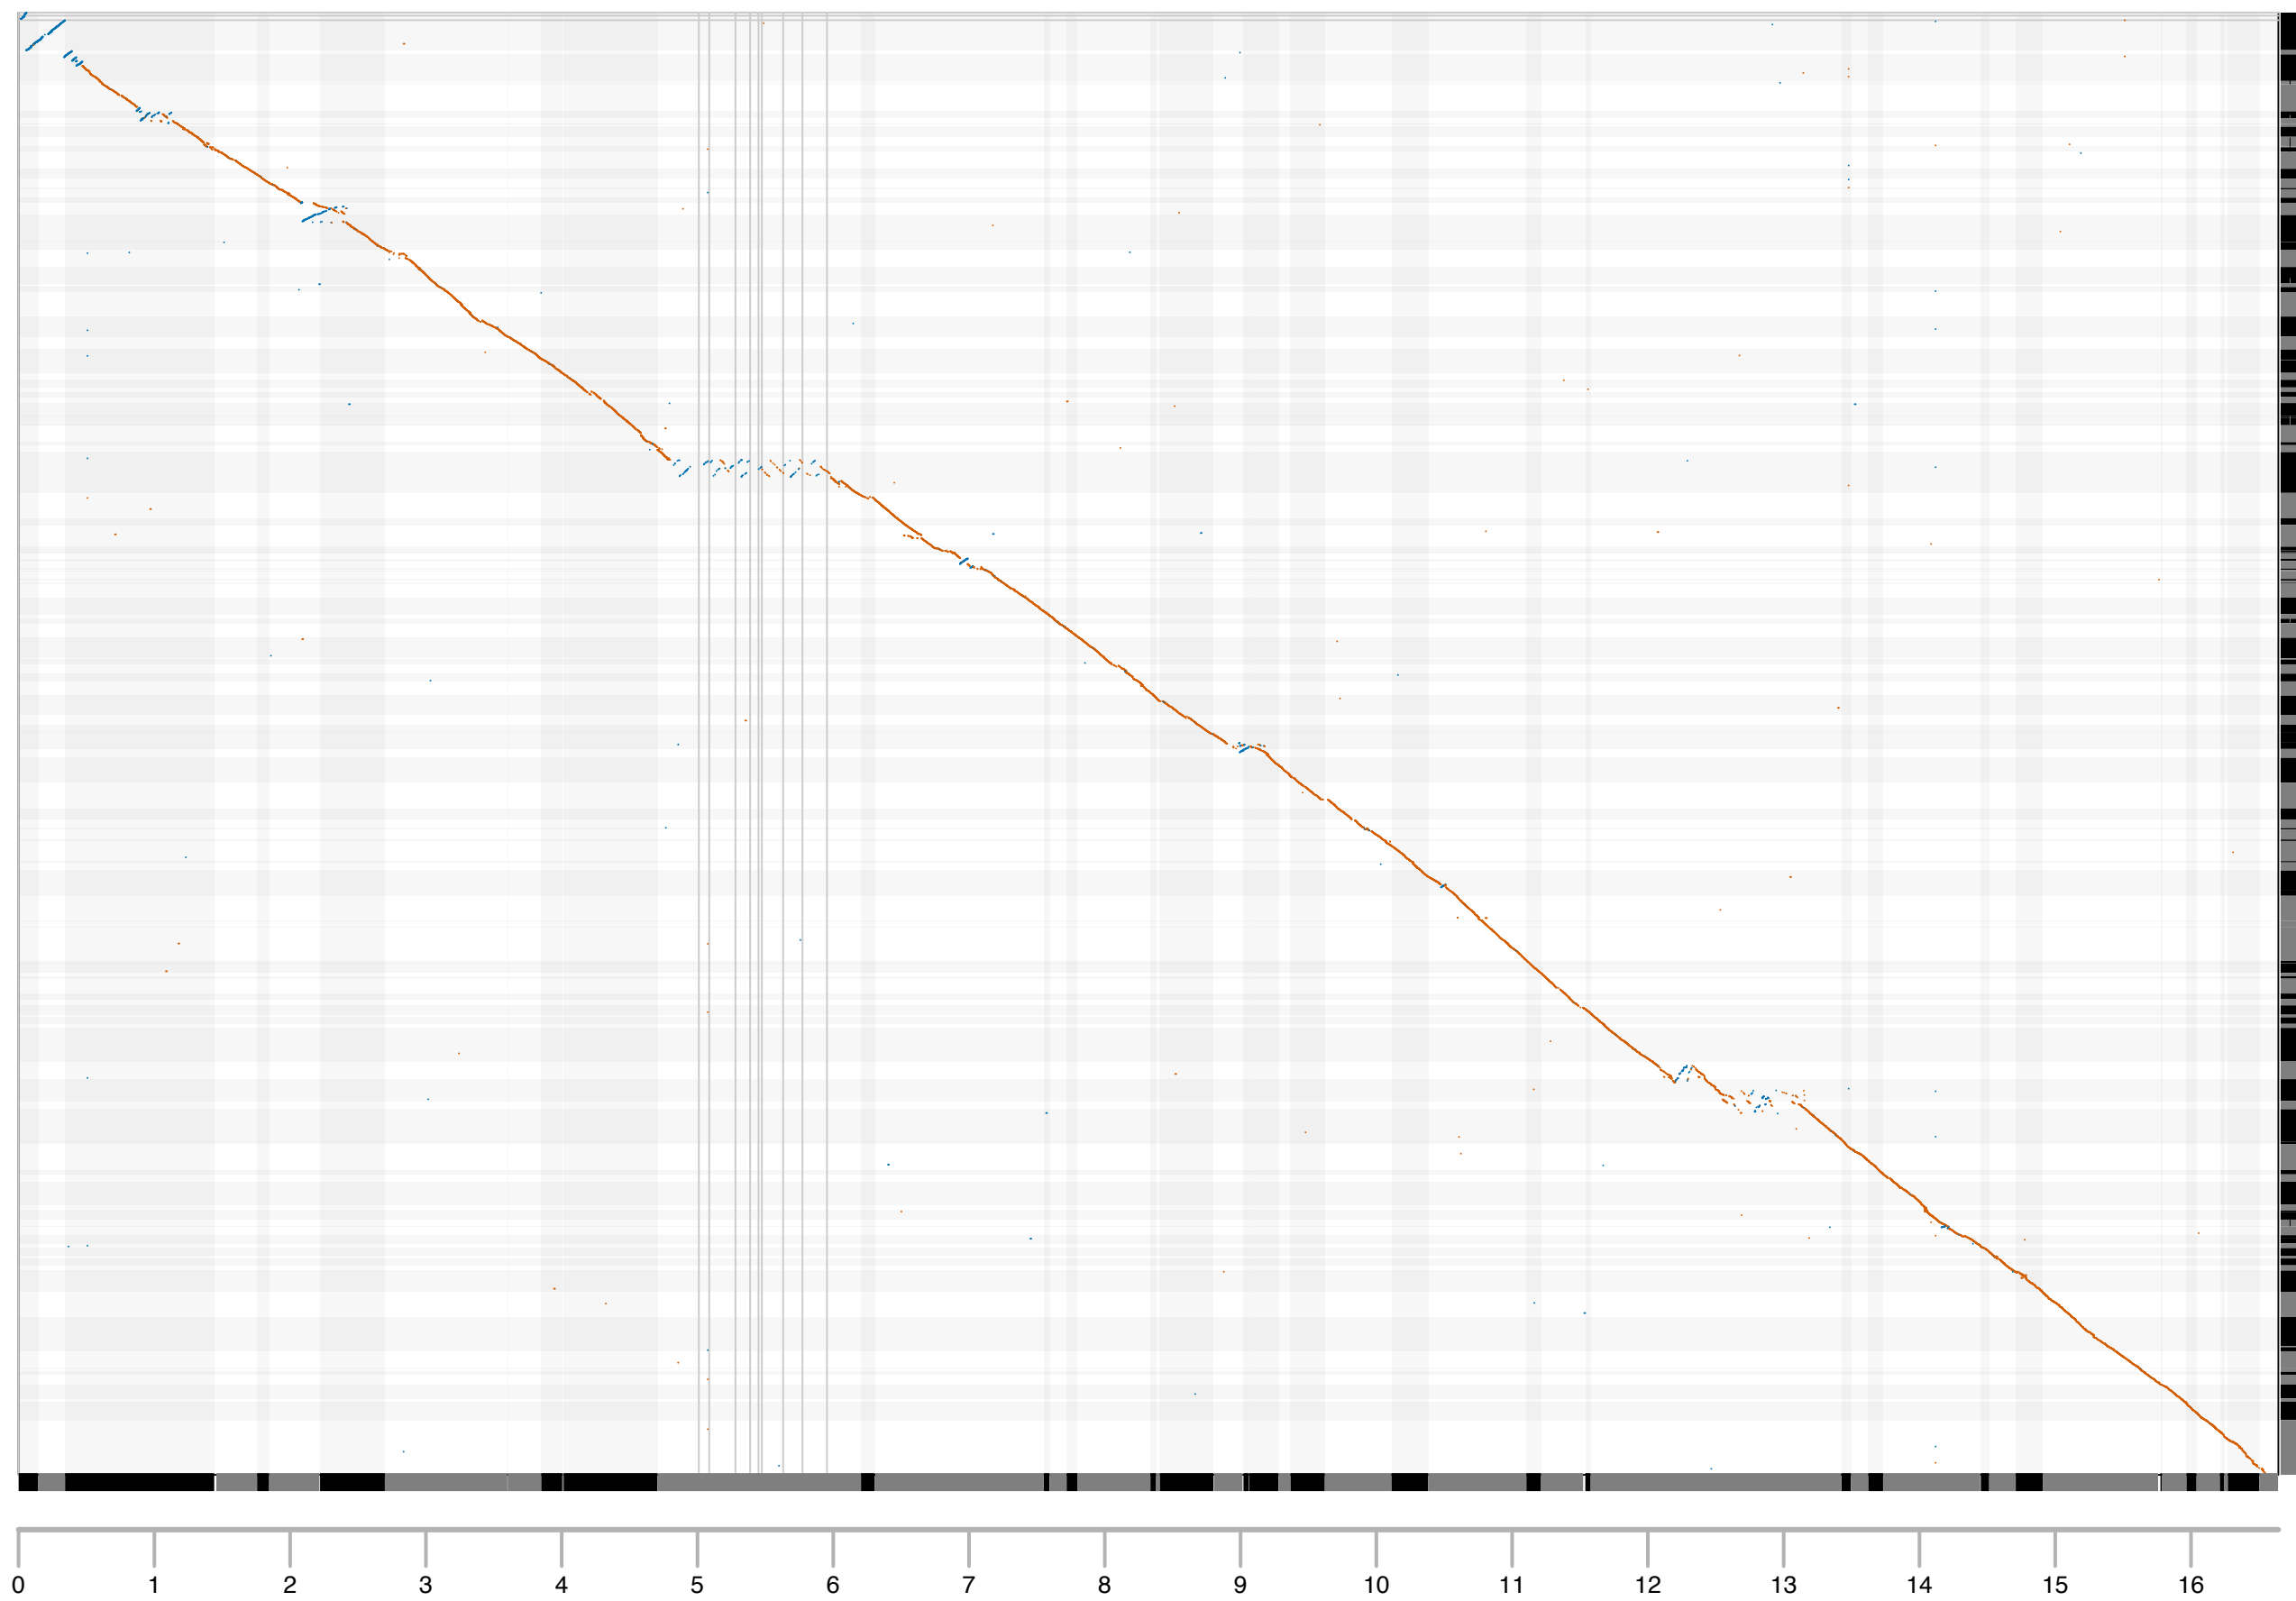

0 1 2 3 4 5 6 7 8 9 10 11 12 13 14 15 16

H. erato Chromosome Position (Mb)

H. melpomene Chromosome Position (Mb)

0  
1  
2  
3  
4  
5  
6  
7  
8  
9  
10

4

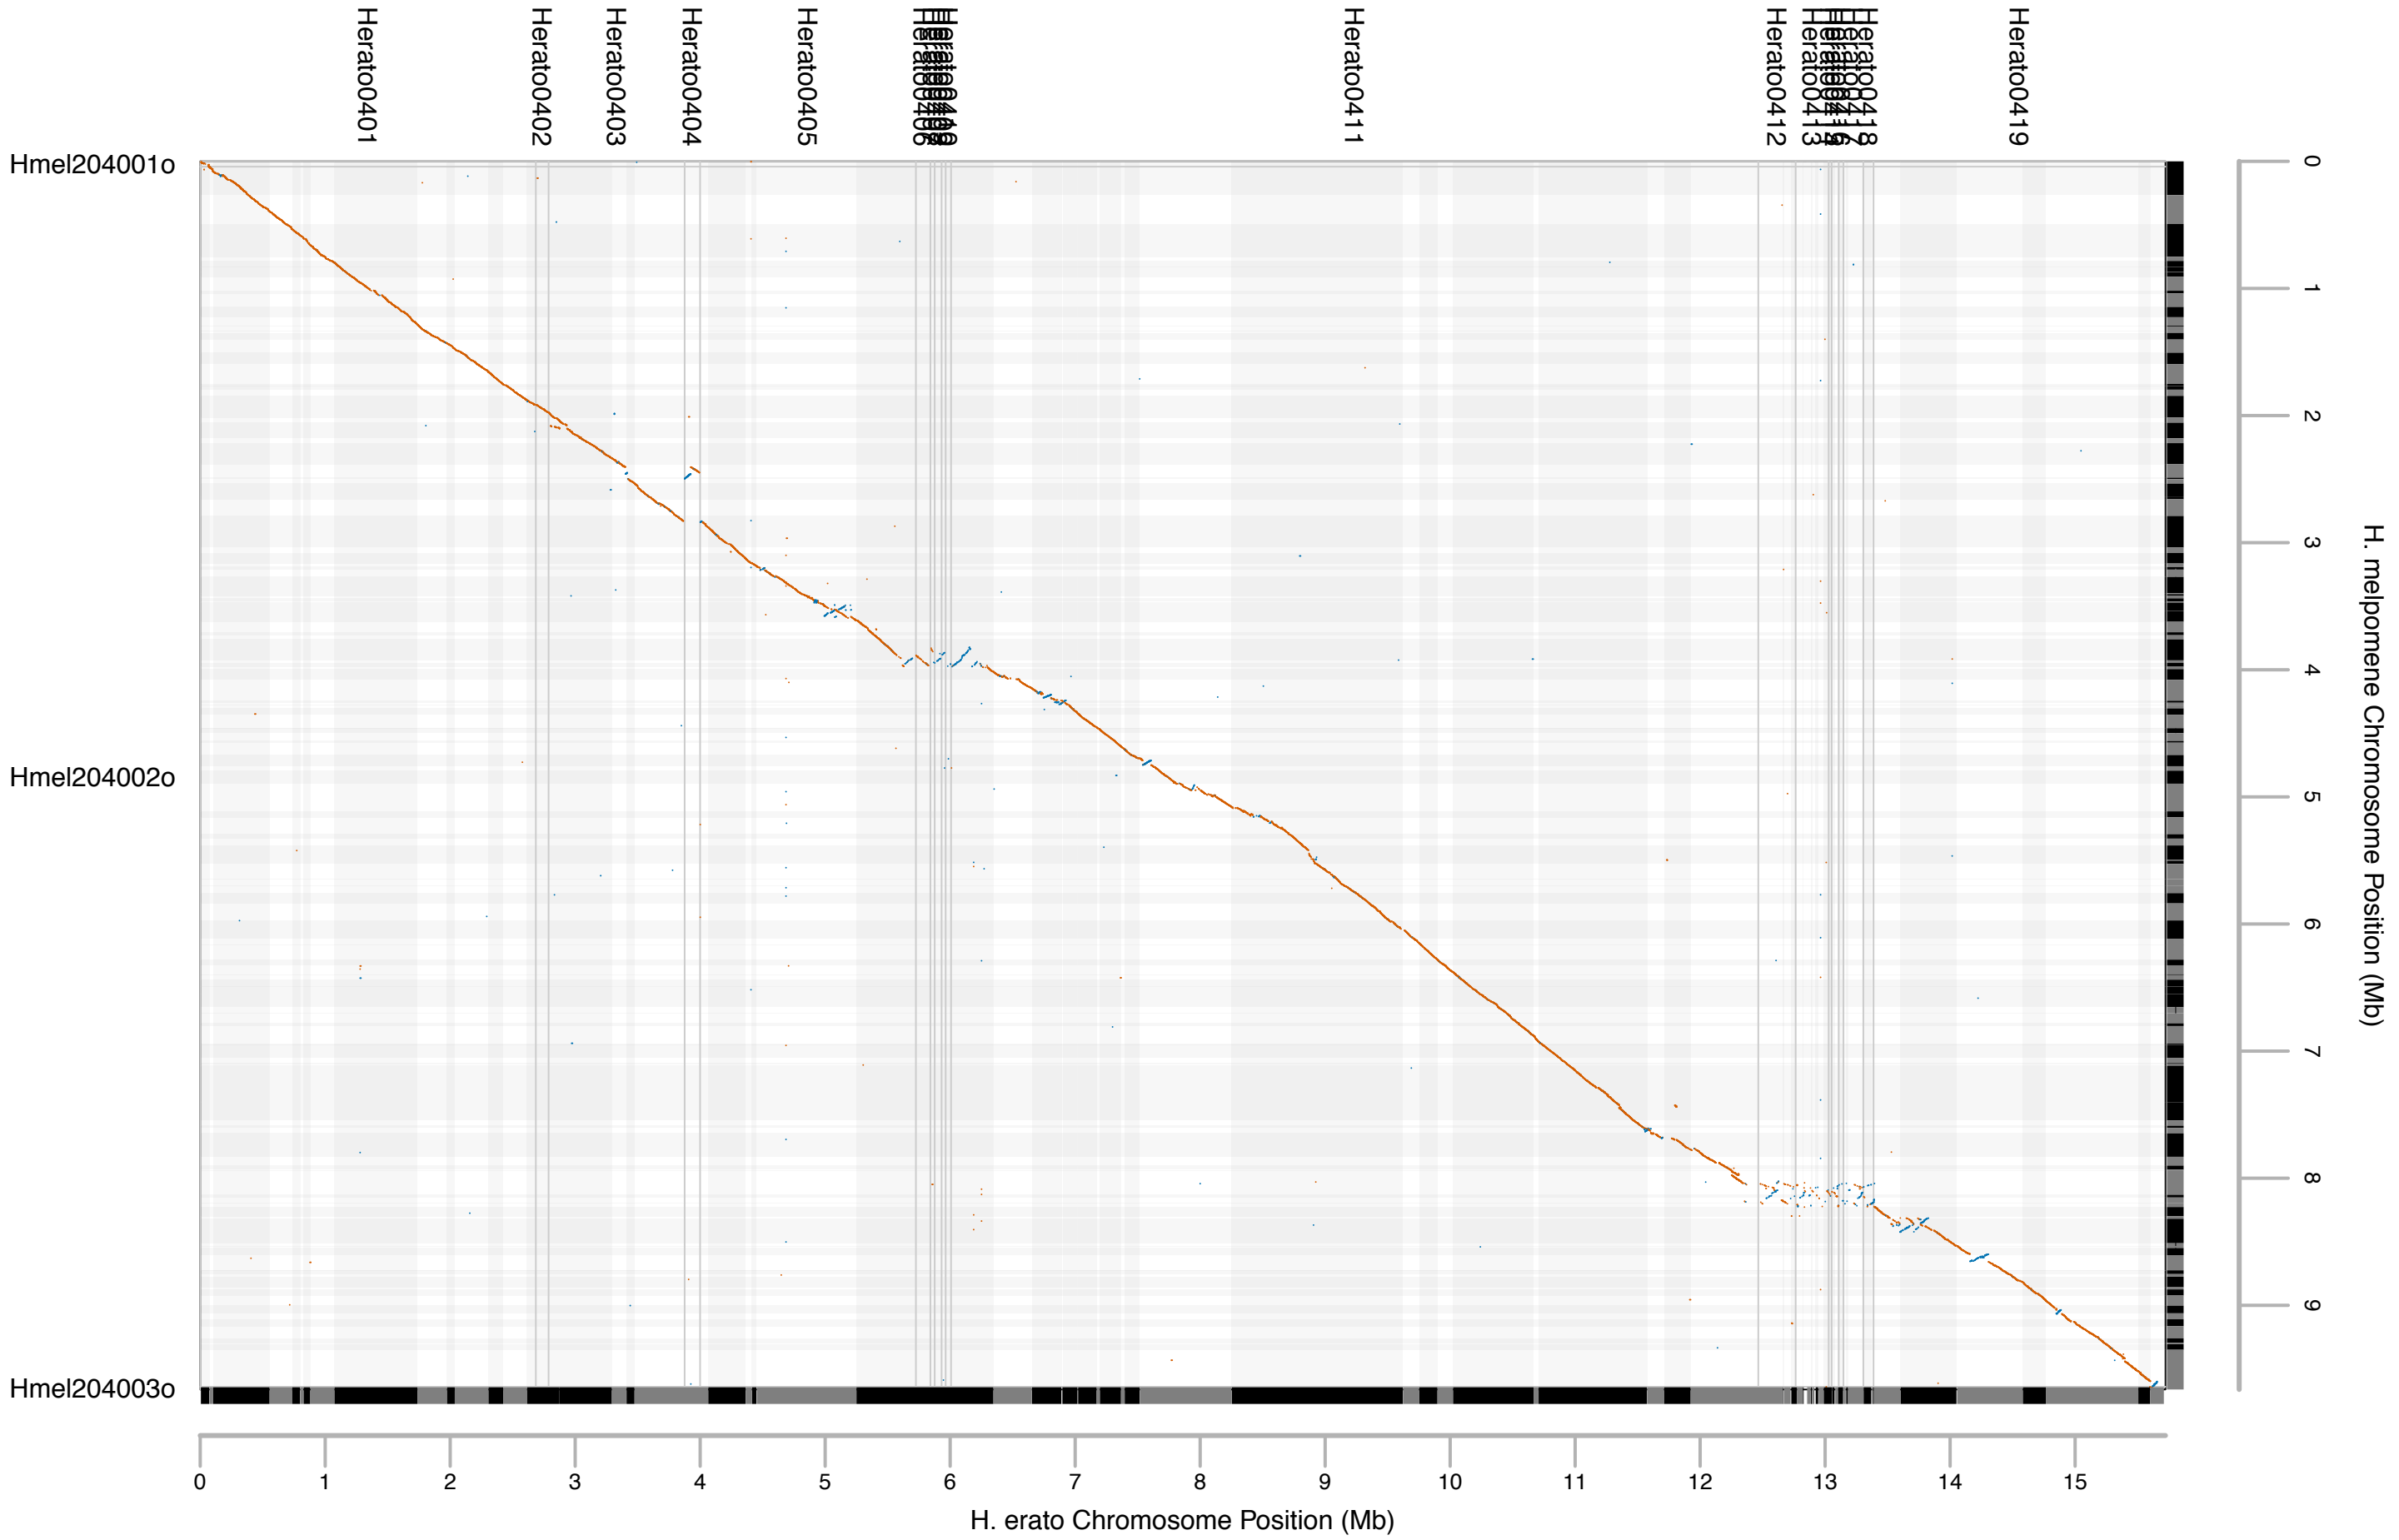

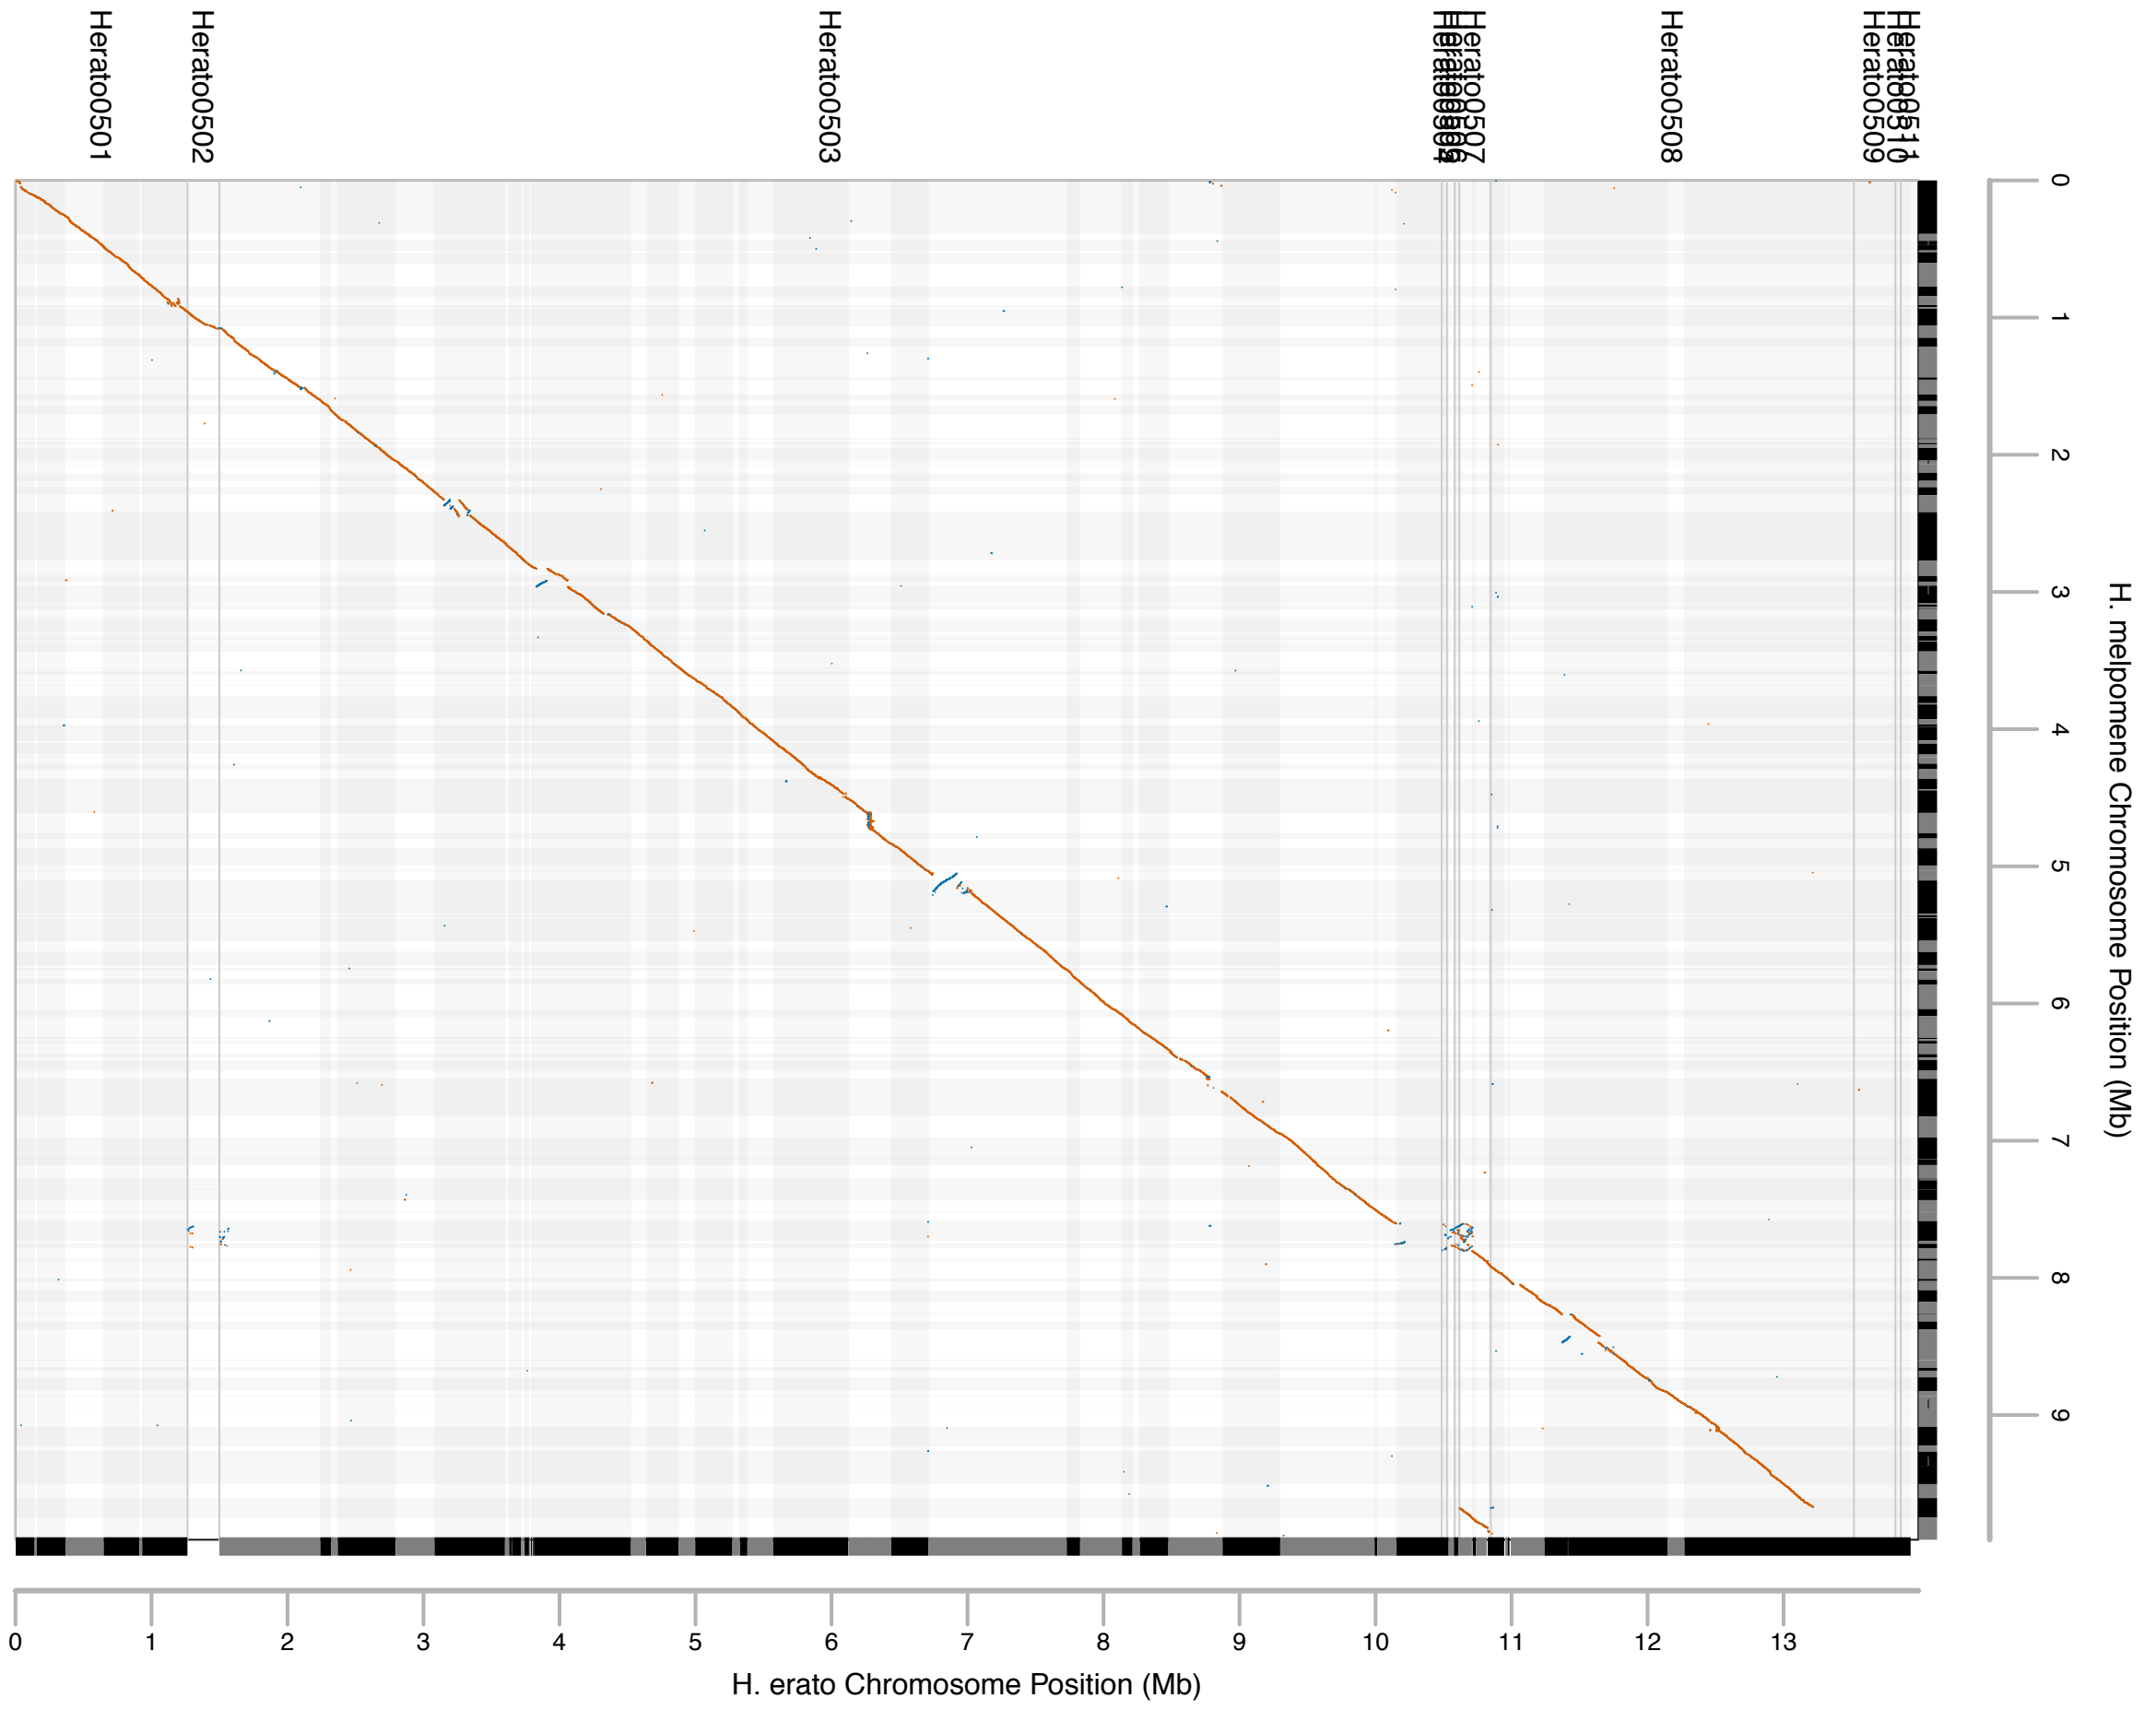

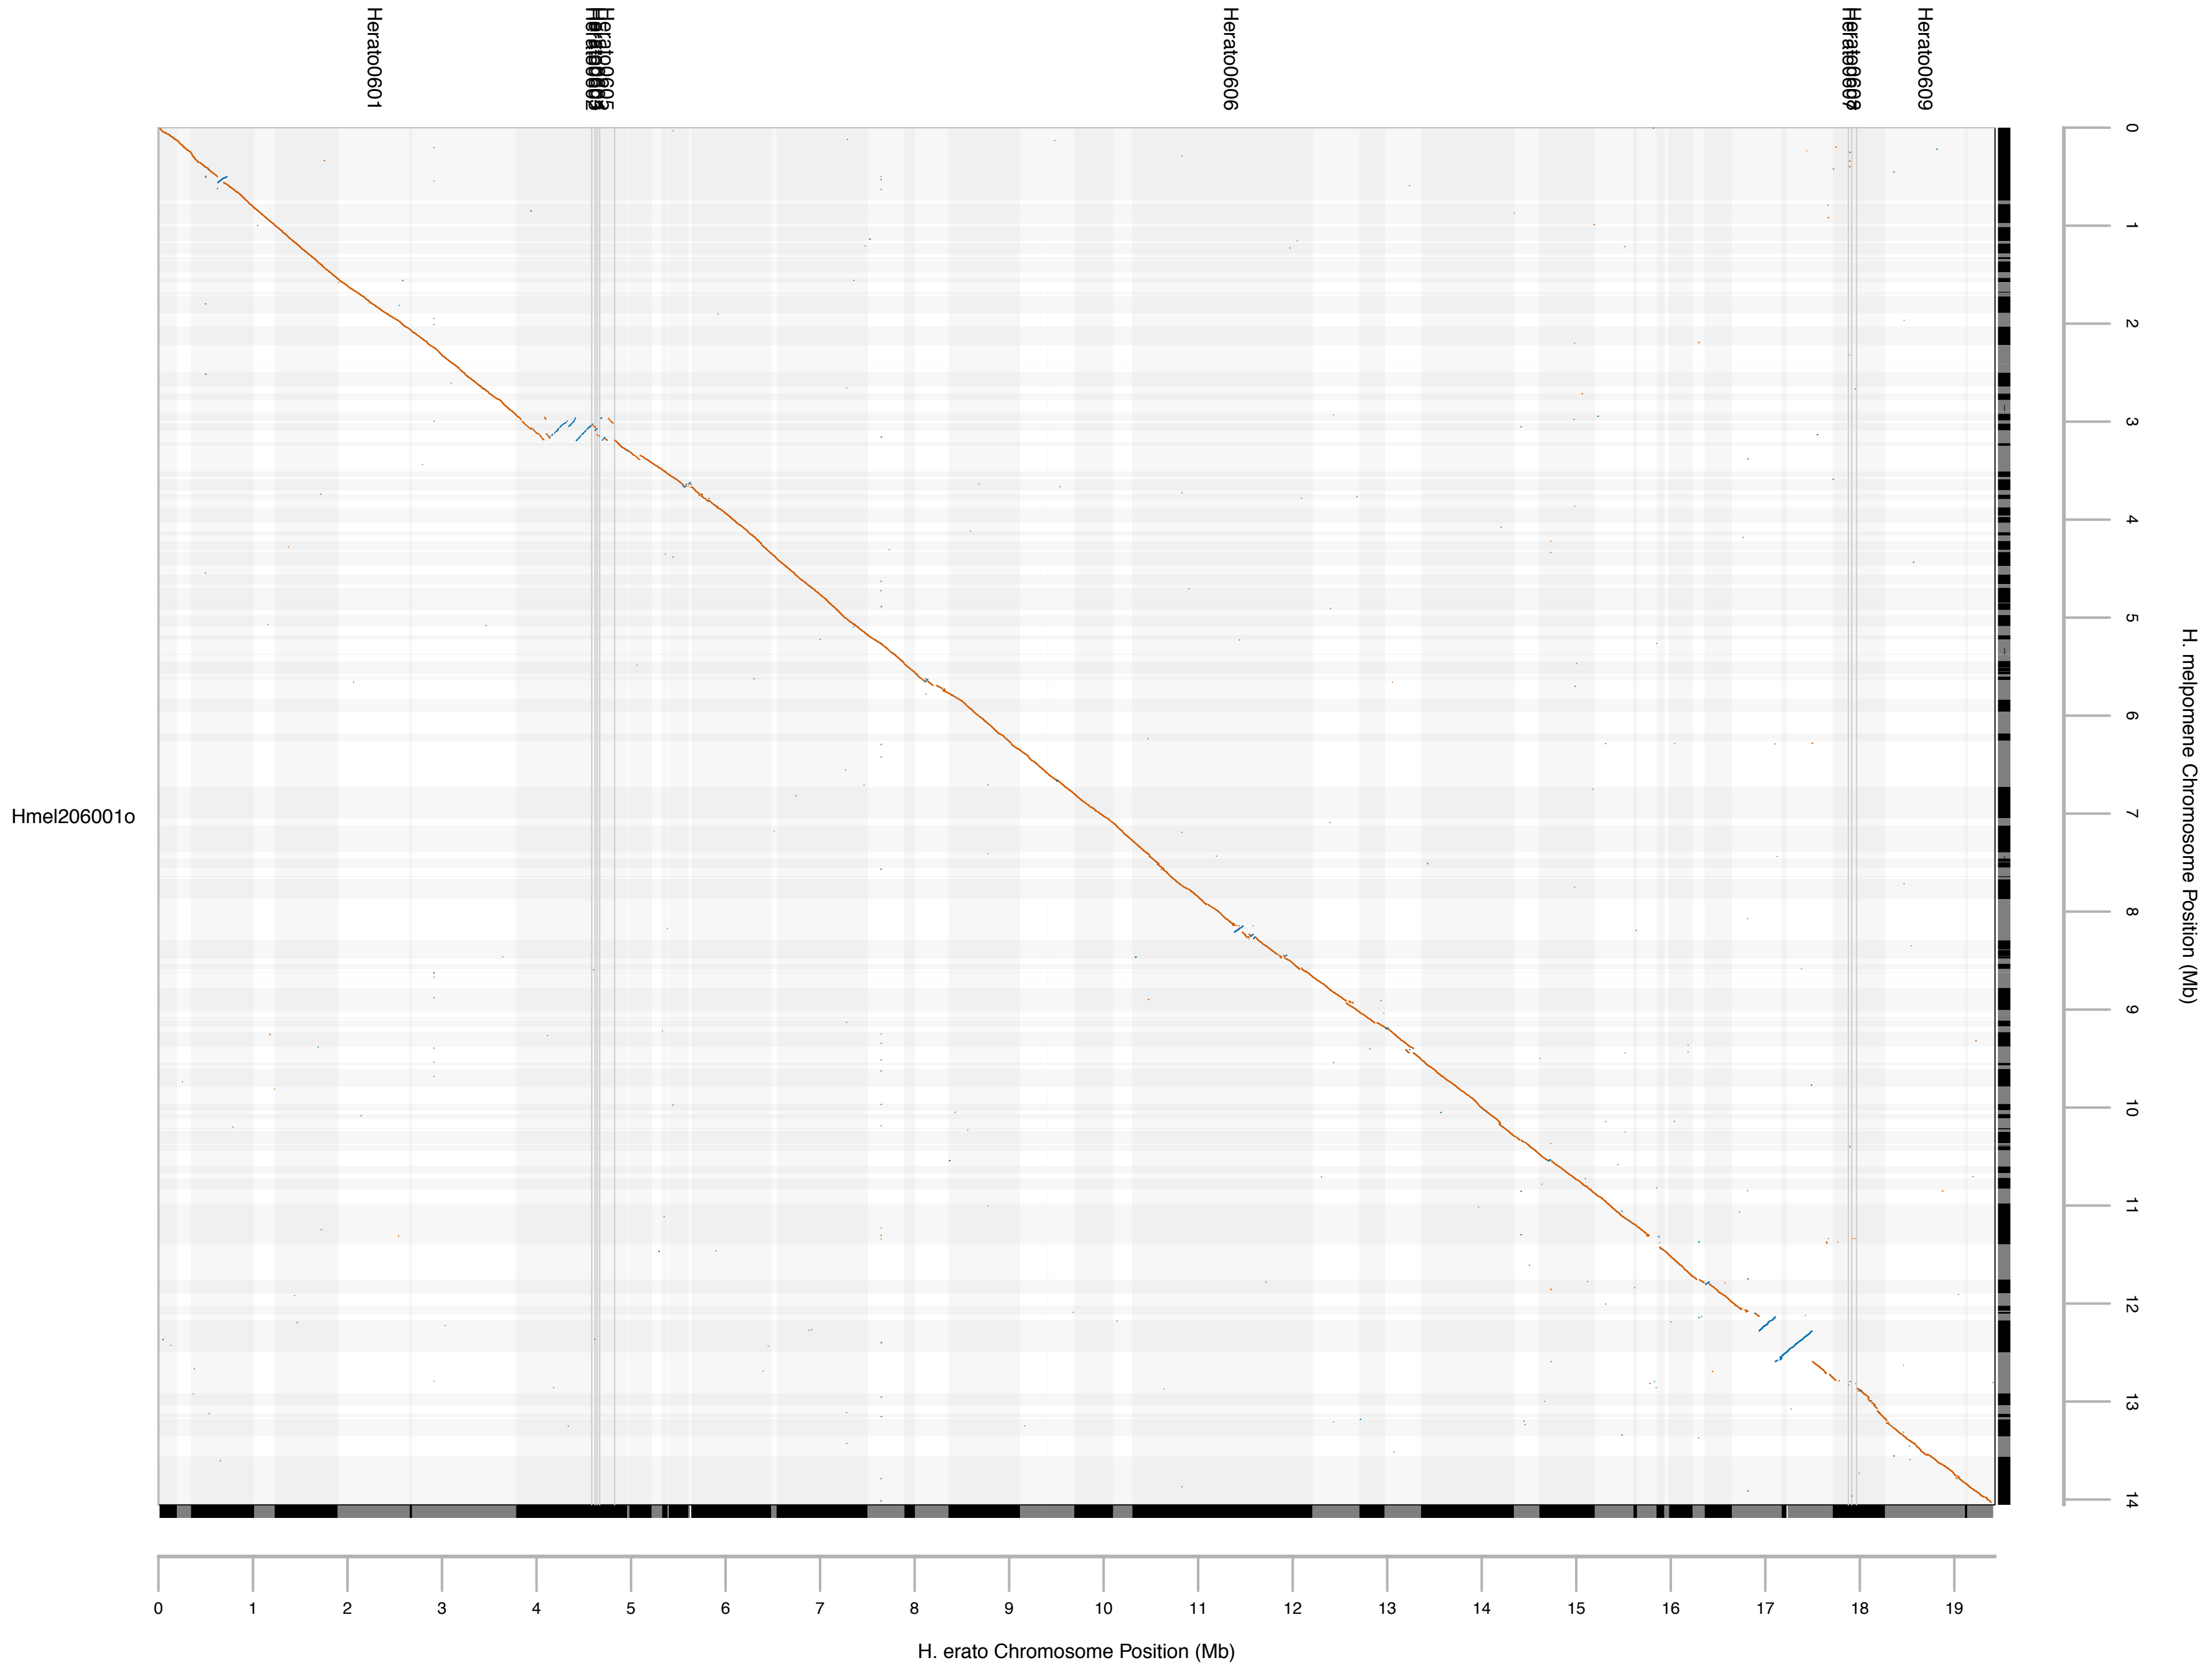

Hmel207001o

Herat00701

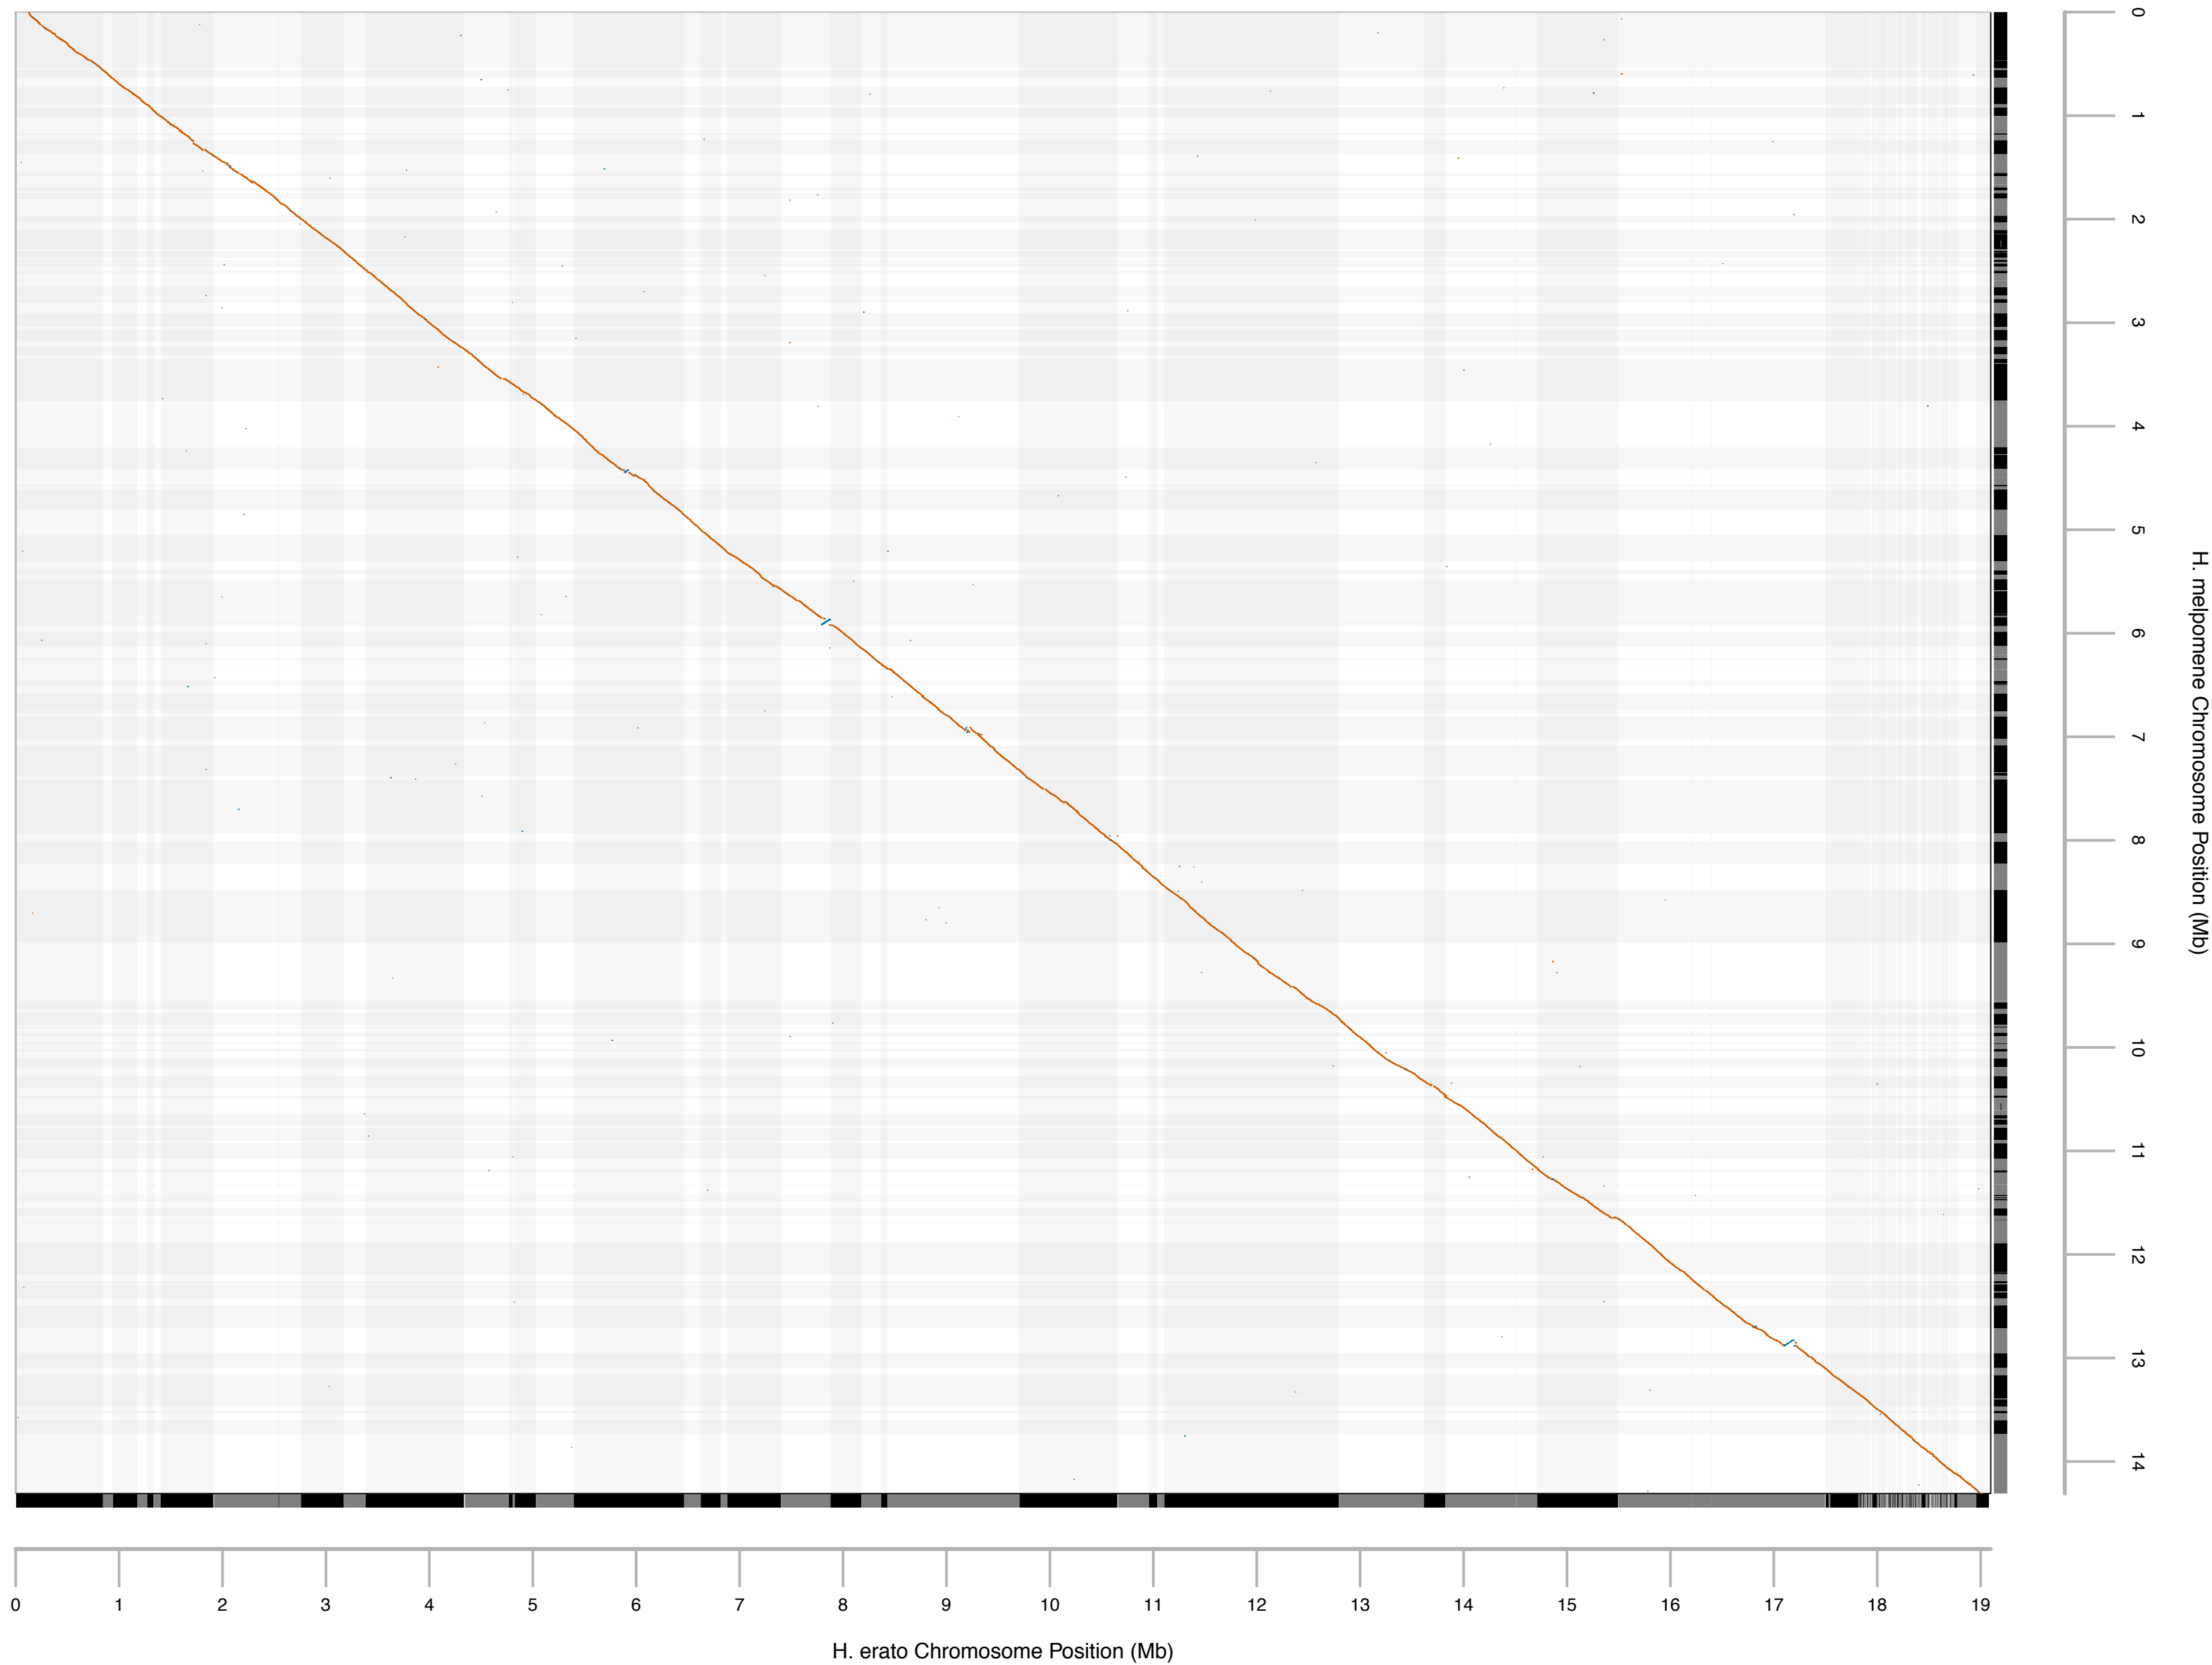

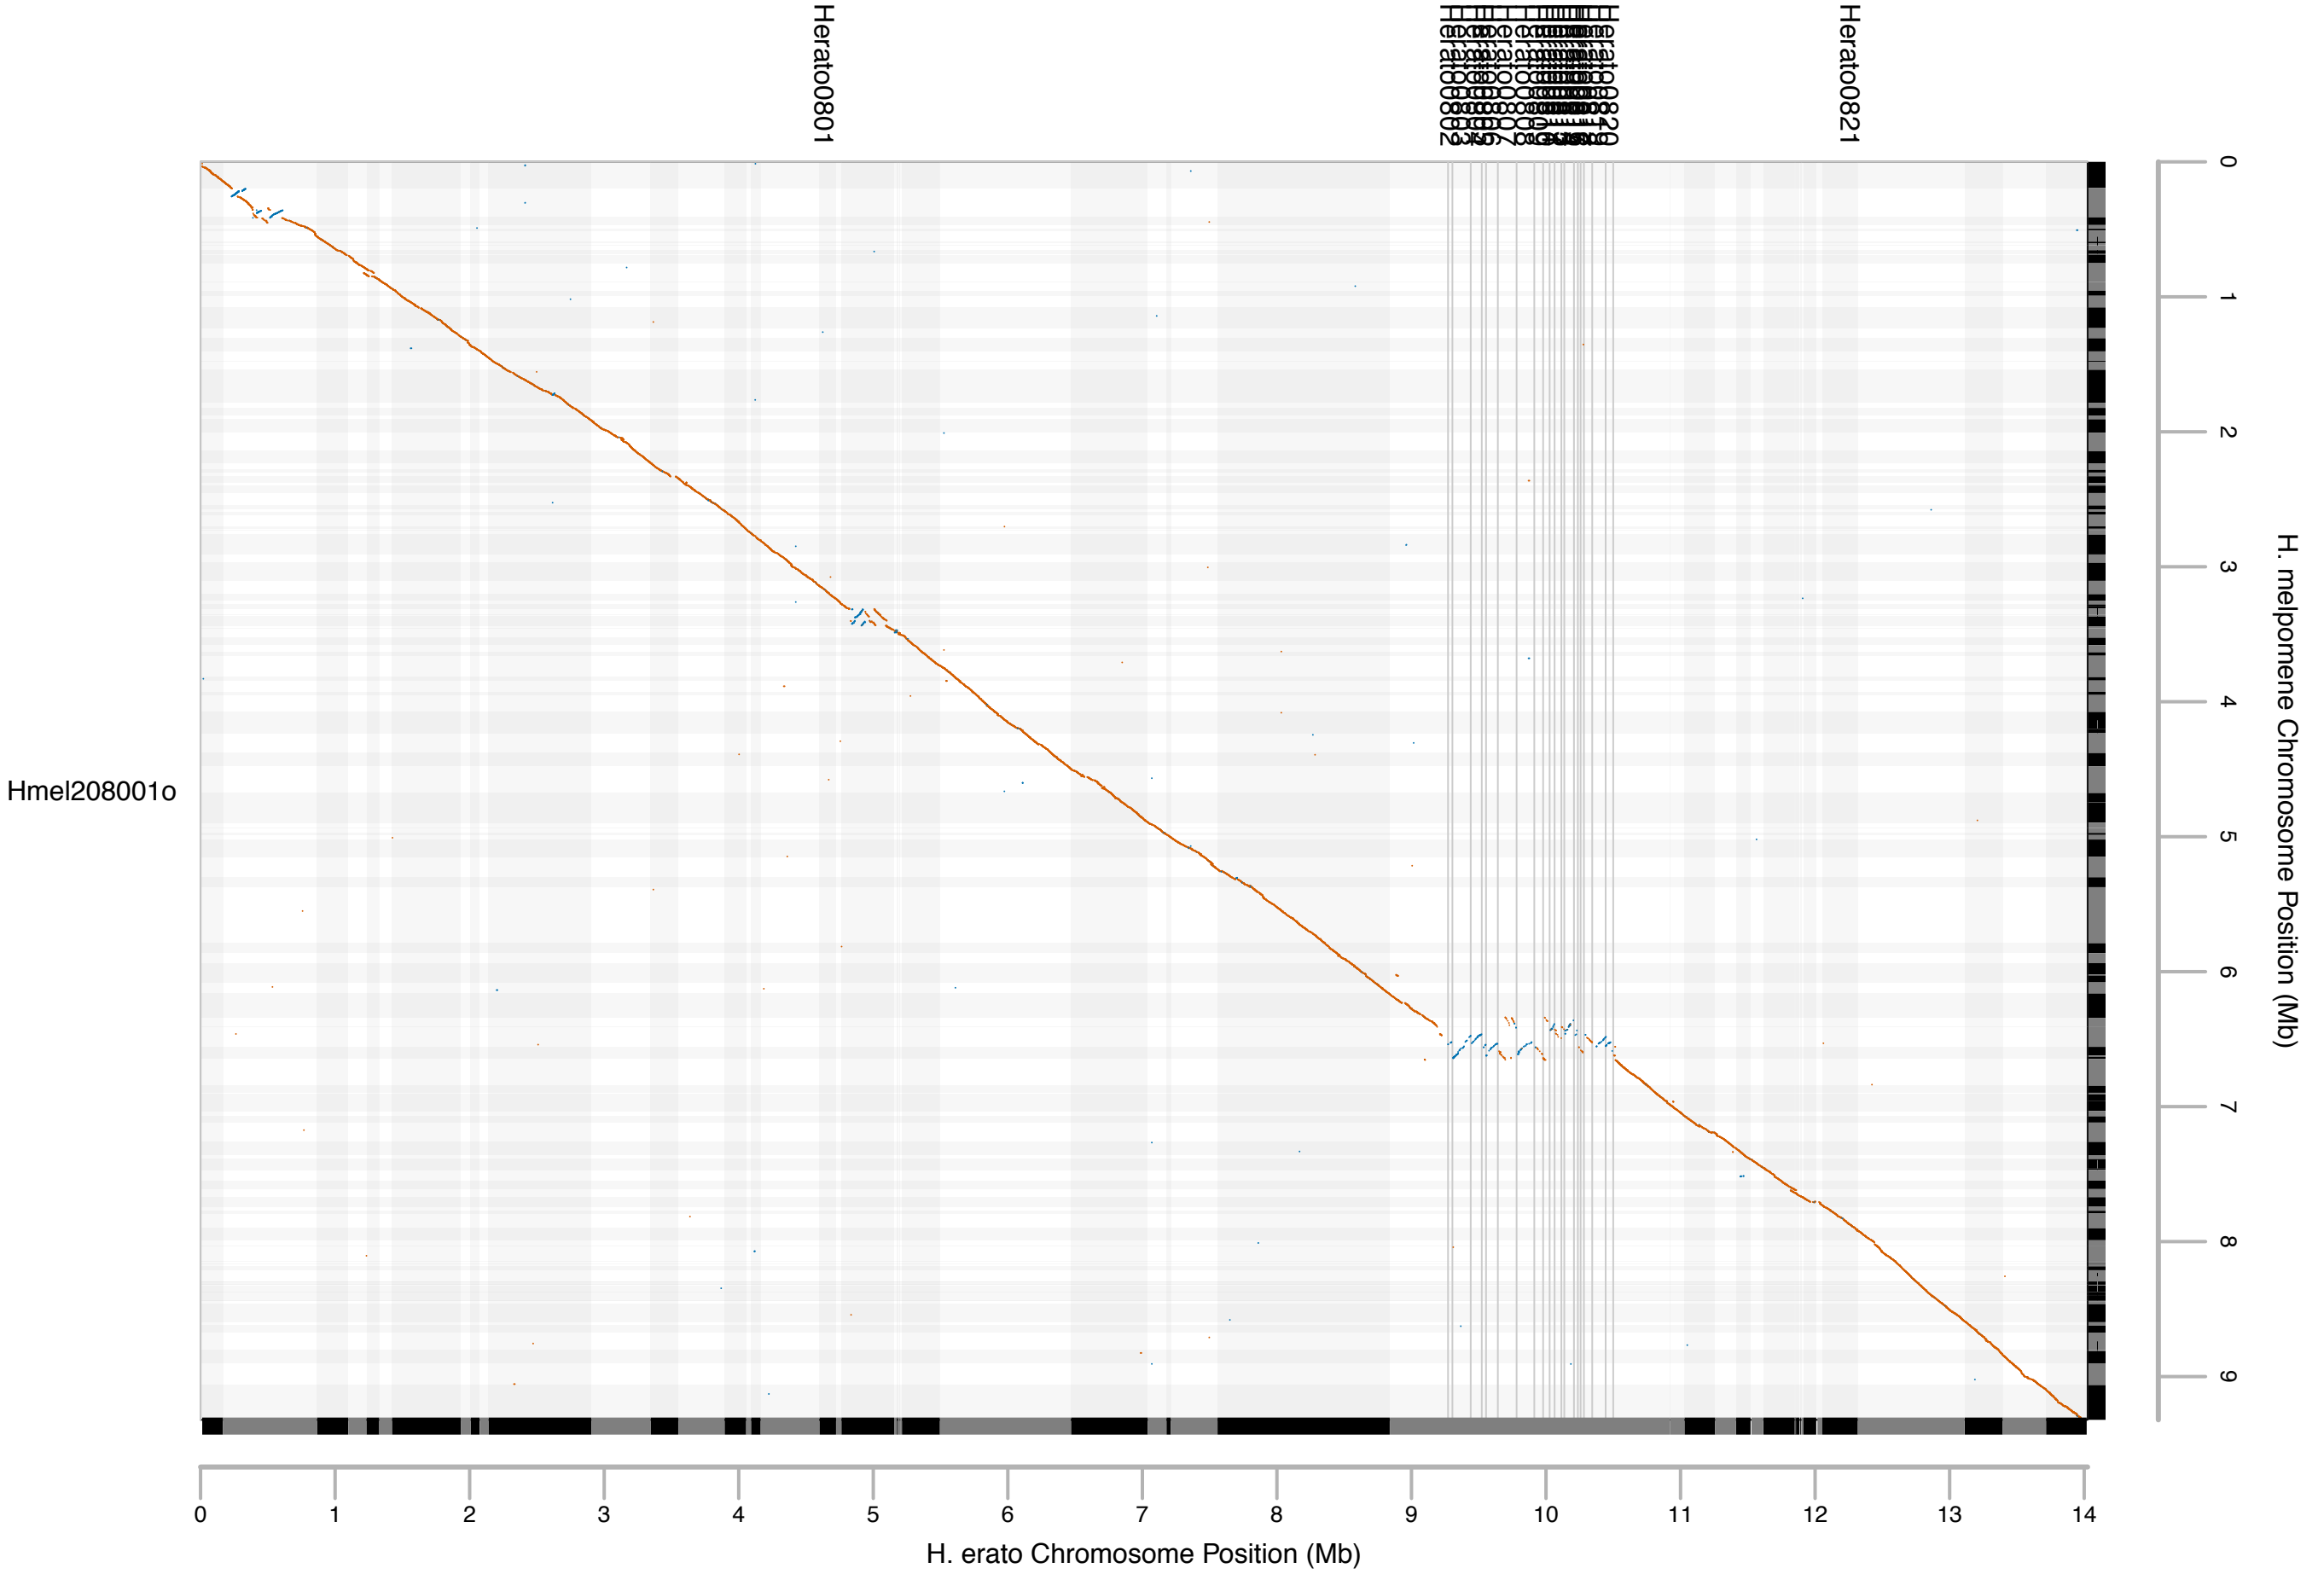



Hmel209001o

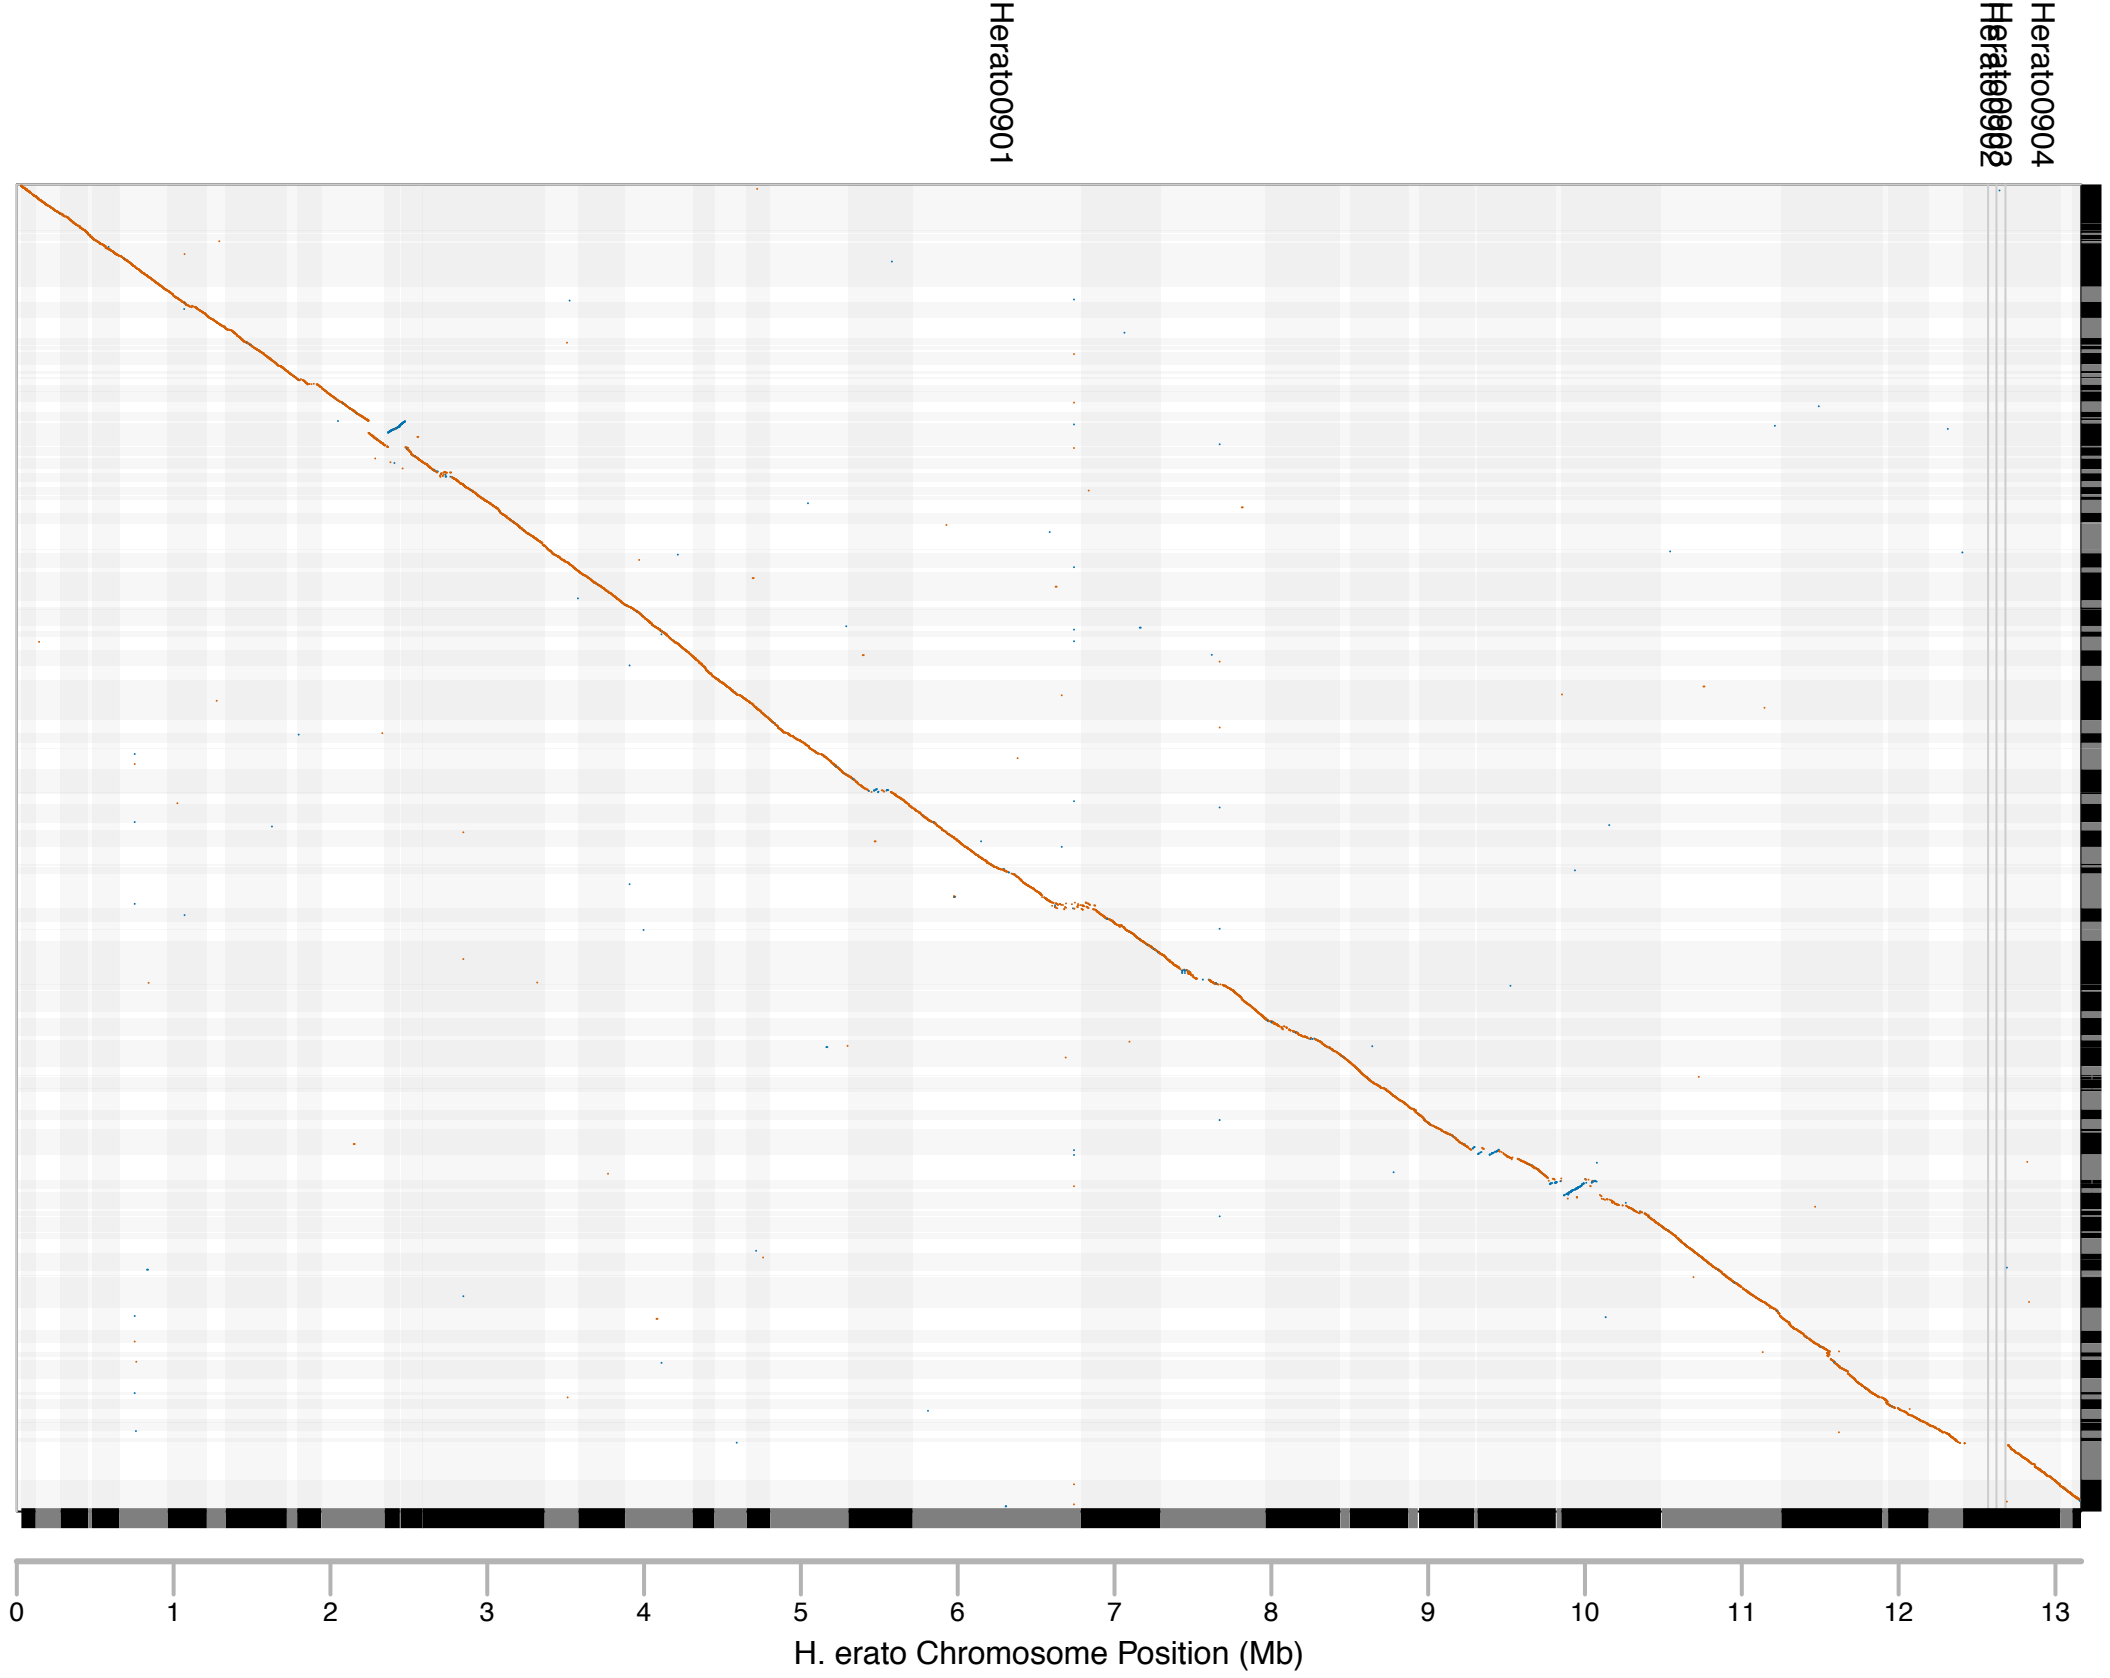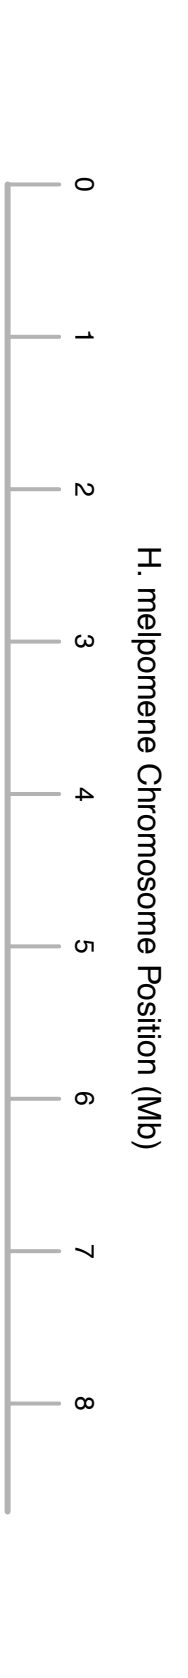

Herato0904  
Herato0902  
Herato0901

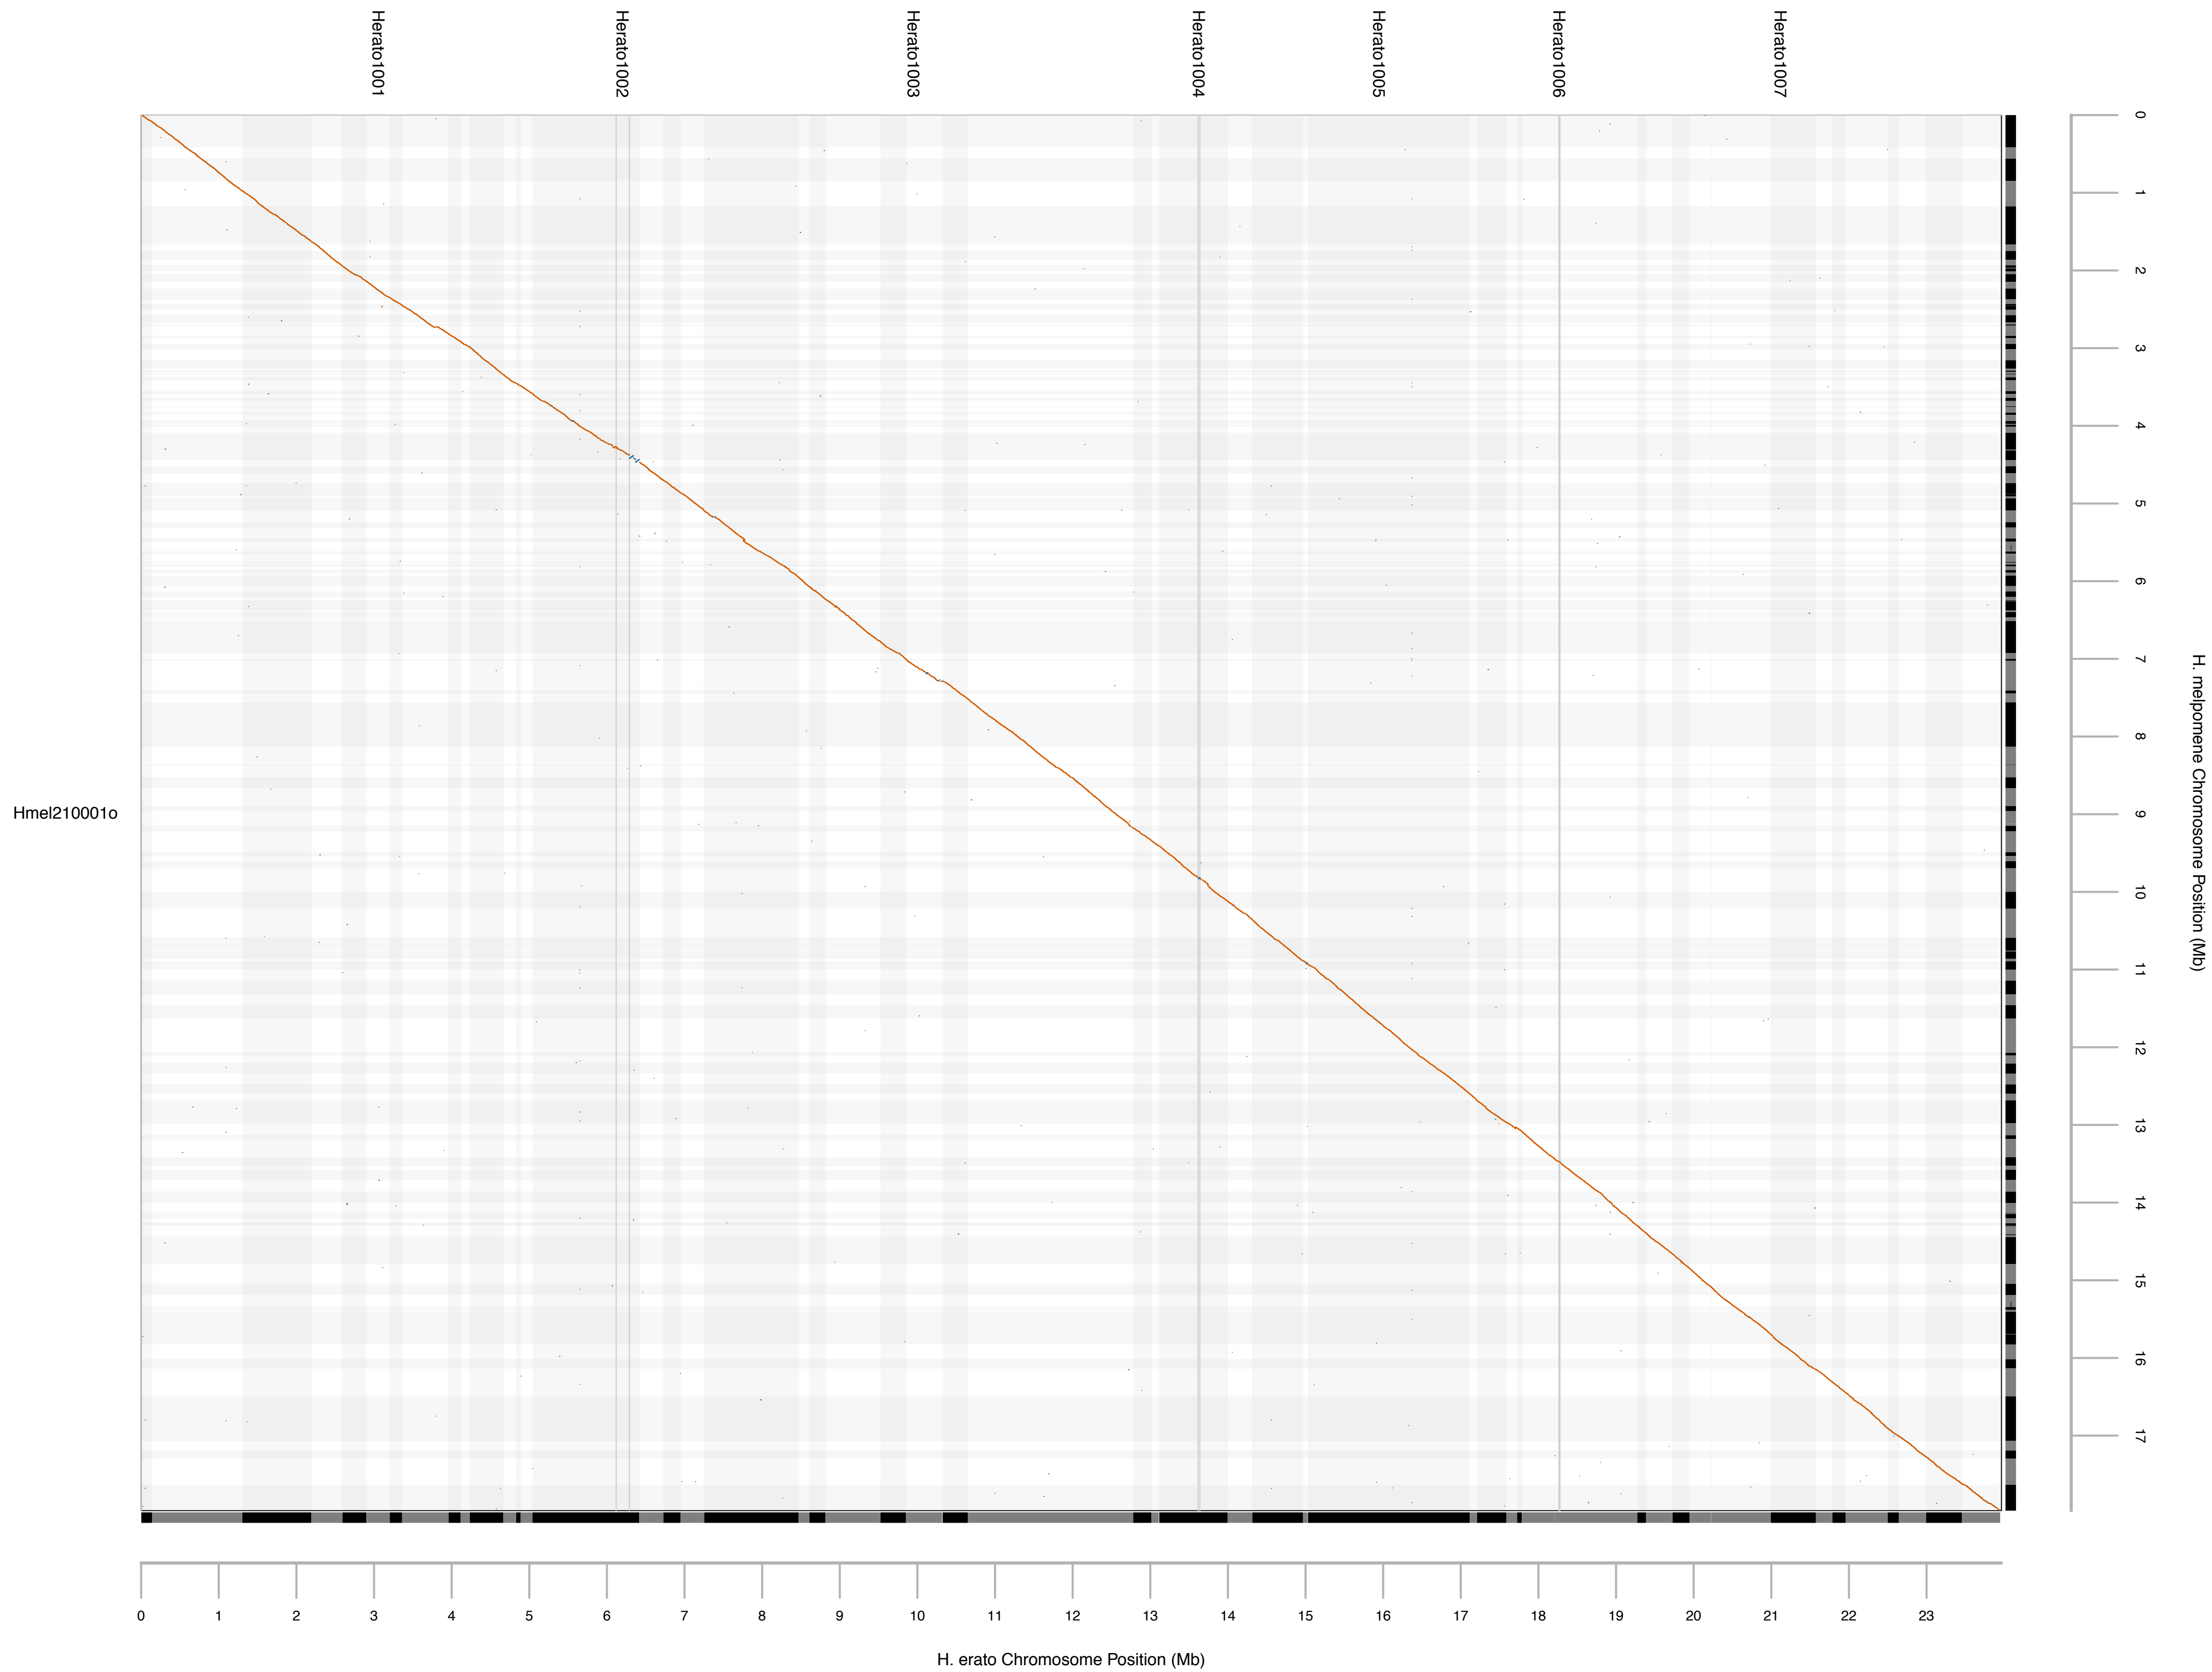

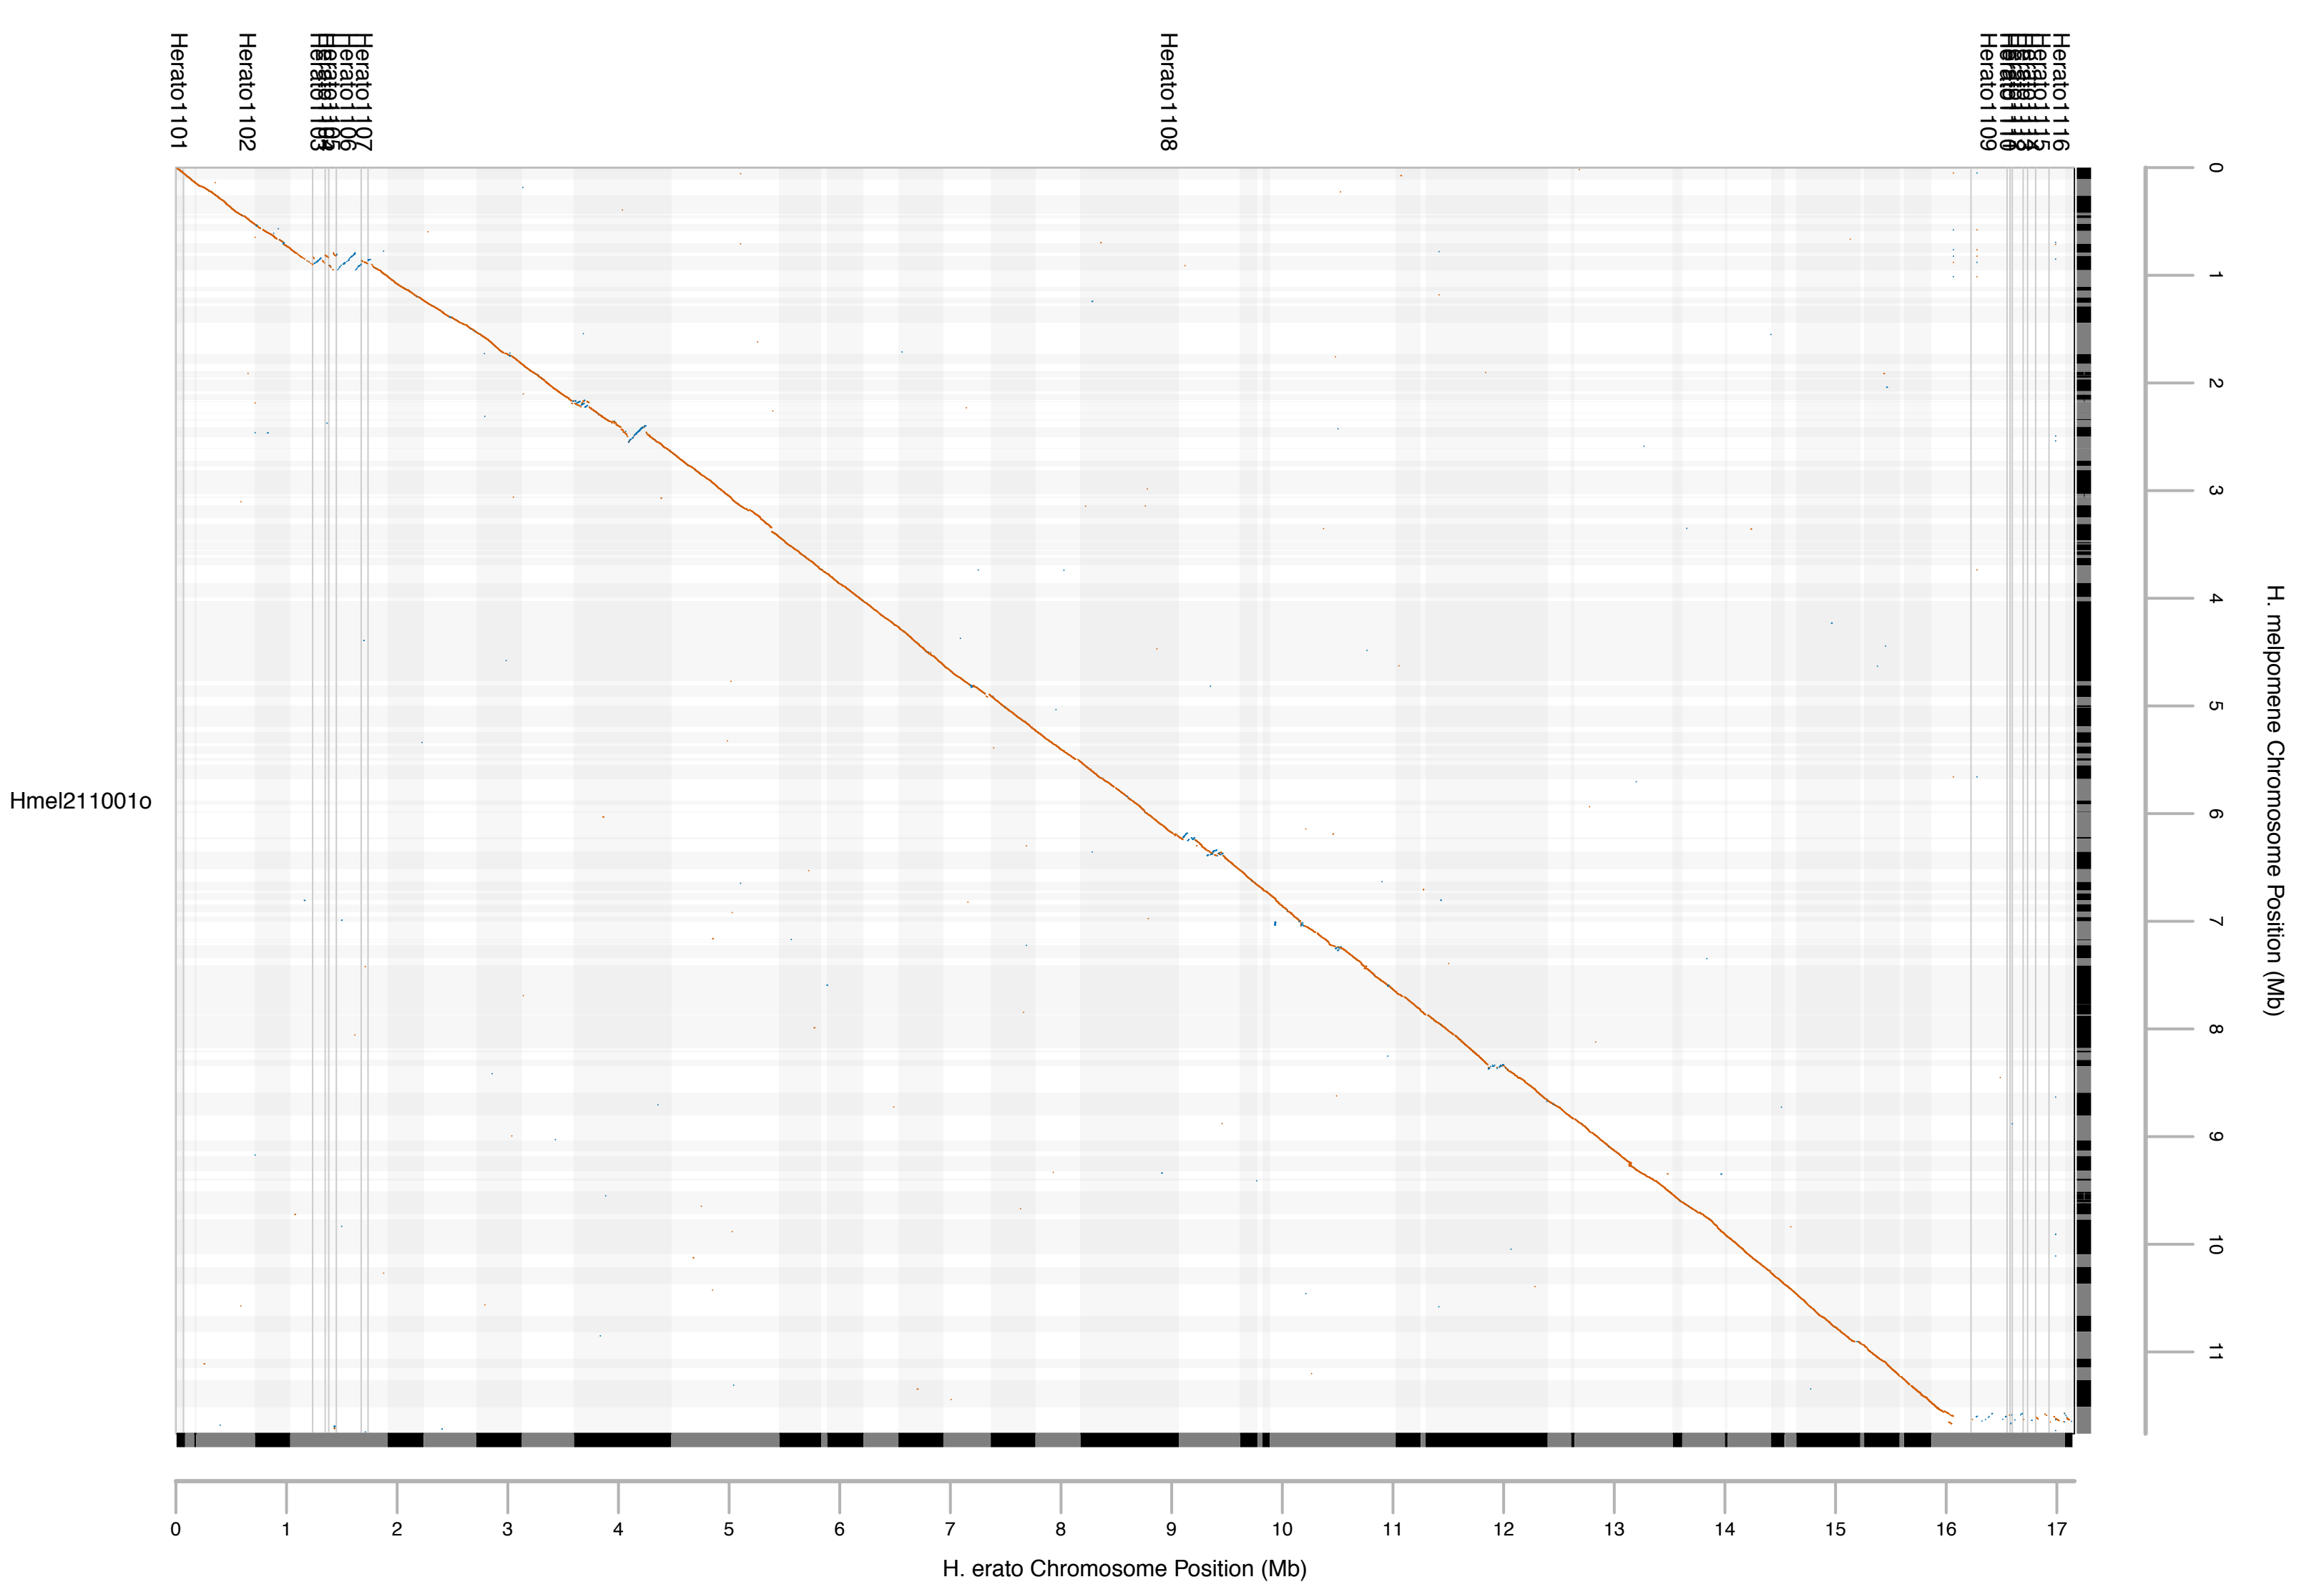

Herato1101

Herato1102

Herato1103

Herato1104

Herato1105

Herato1106

Herato1107

Herato1108

Herato1109

Herato1110

Herato1111

Herato1112

Herato1113

Herato1114

Herato1115

Herato1116

Hmel211001o

0 1 2 3 4 5 6 7 8 9 10 11 12 13 14 15 16 17

H. erato Chromosome Position (Mb)

0 1 2 3 4 5 6 7 8 9 10 11

H. melponene Chromosome Position (Mb)

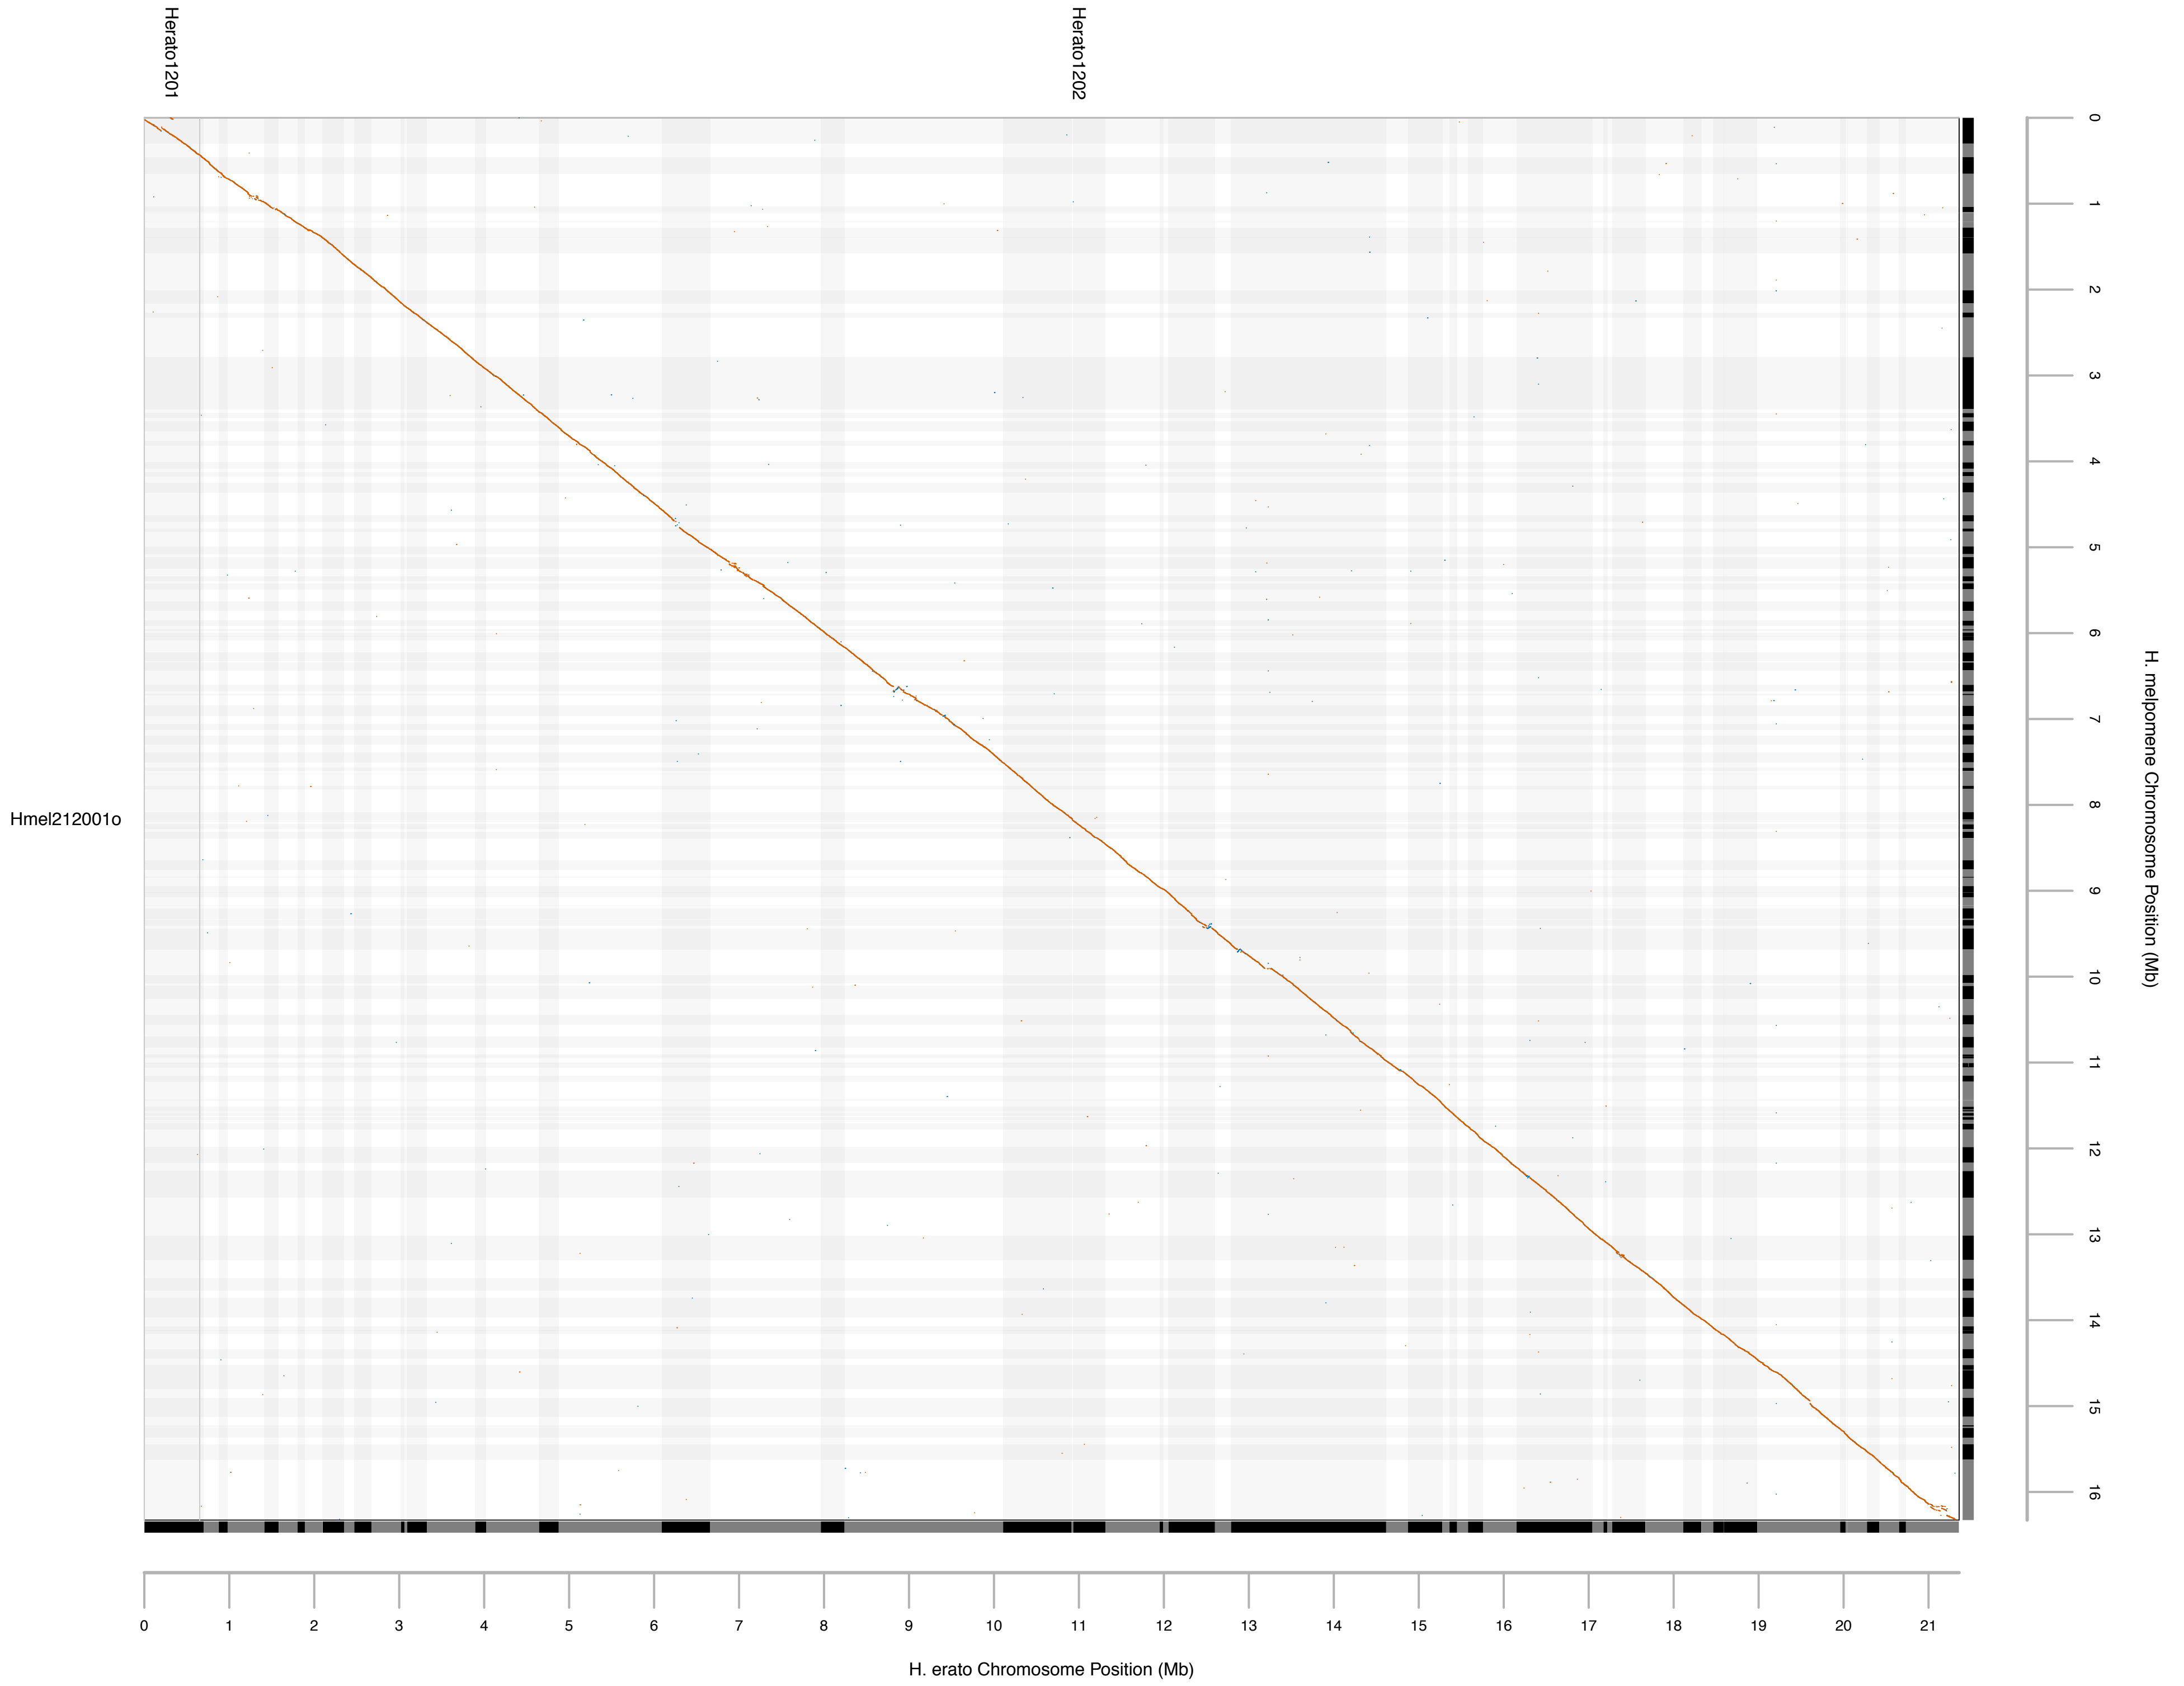

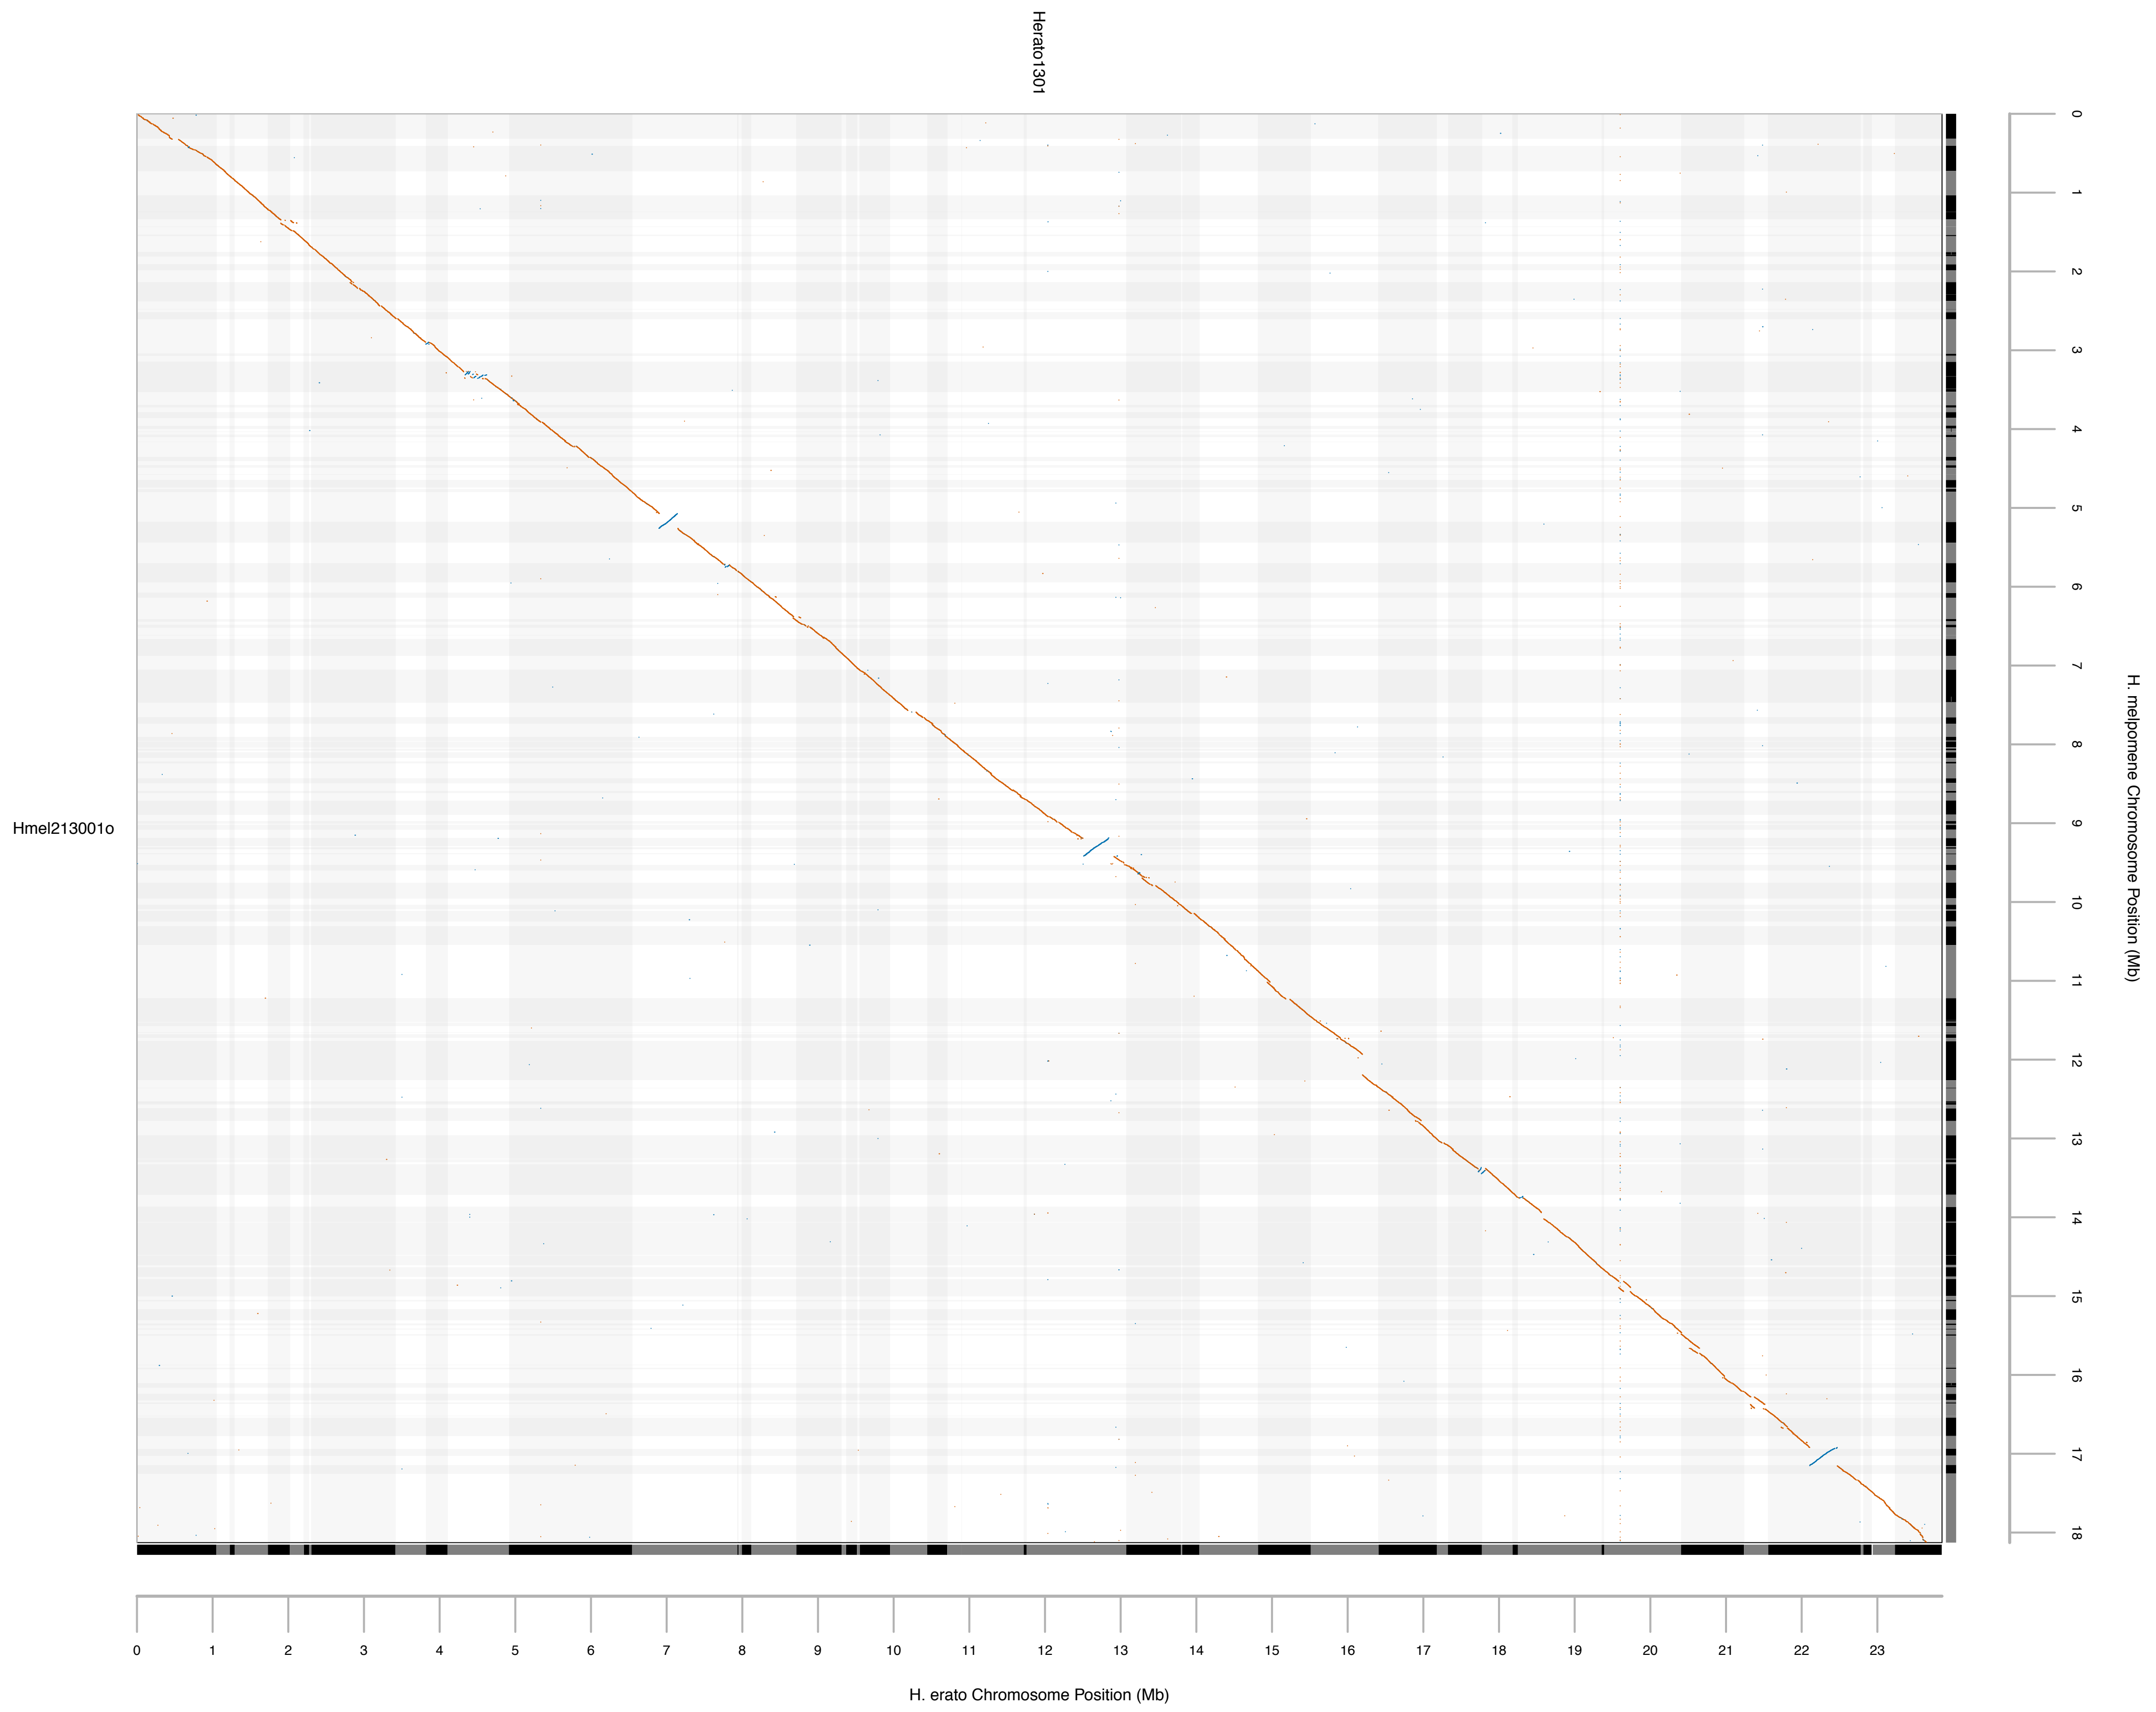

14

Hmel2140010  
Hmel2140020  
Hmel2140040

Hera101405  
Hera101406  
Hera101407  
Hera101408

Hera101408

Hera101410  
Hera101409

Hera101411

Hmel2140050

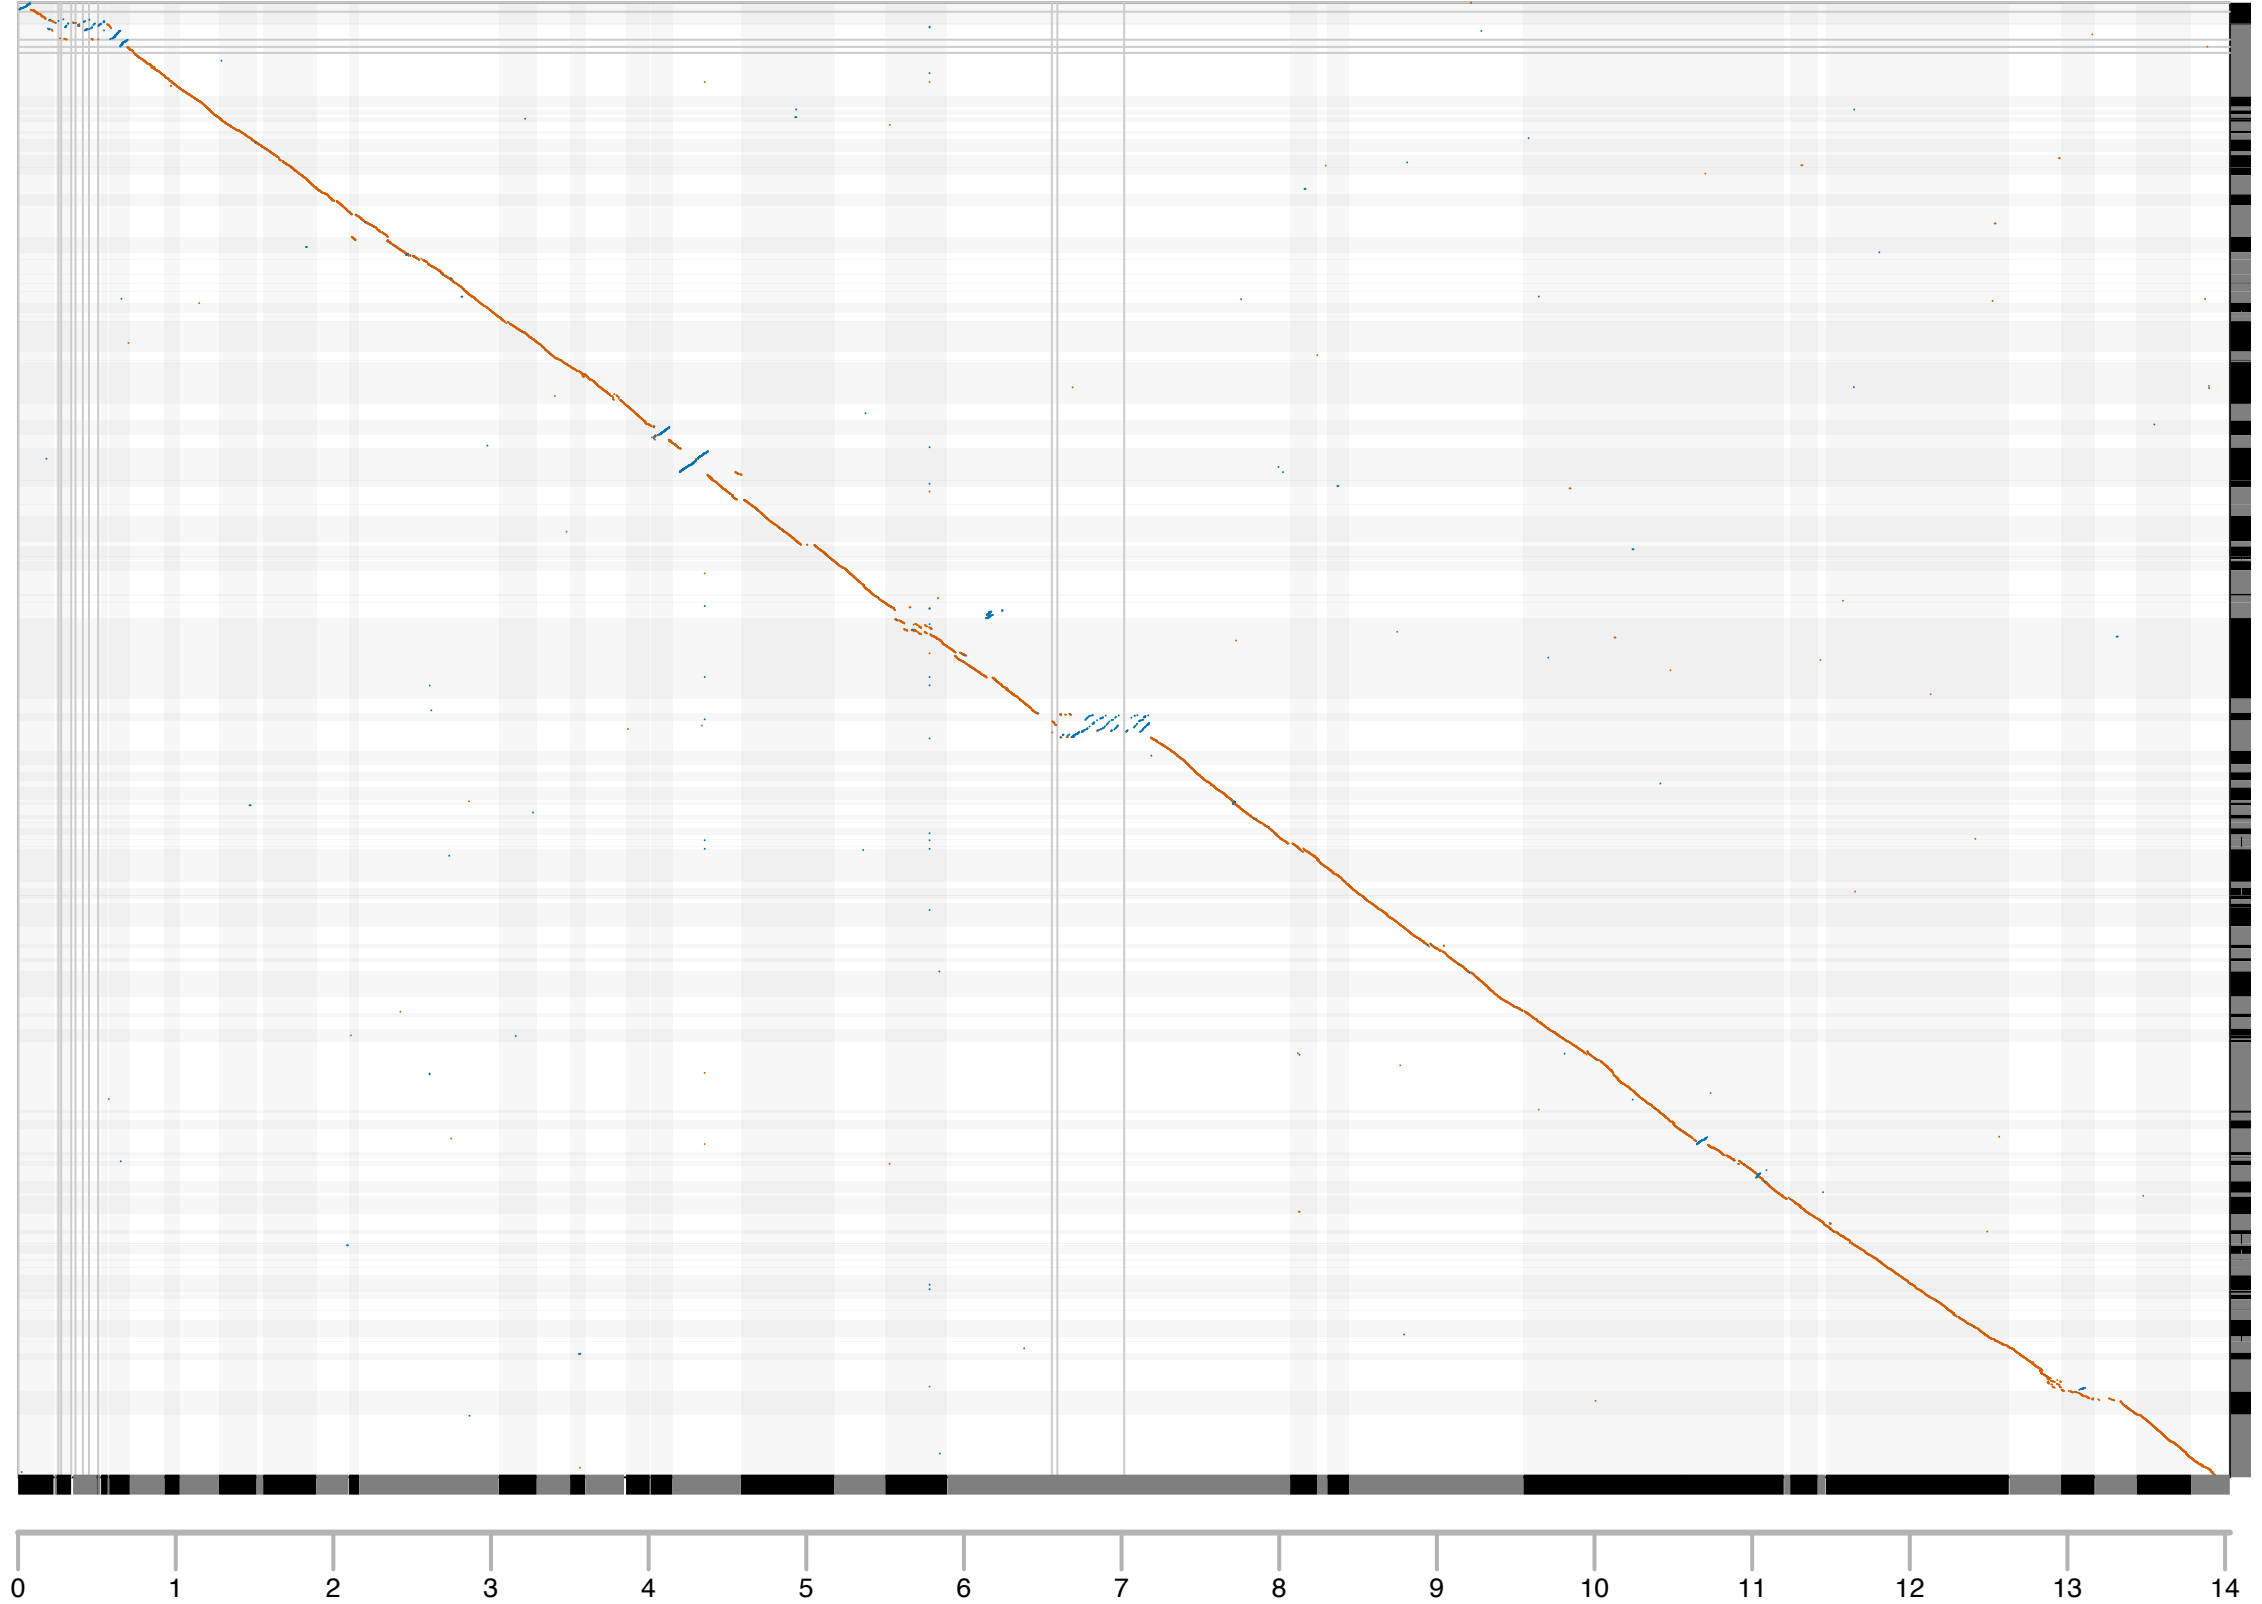

H. melpomene Chromosome Position (Mb)

H. erato Chromosome Position (Mb)

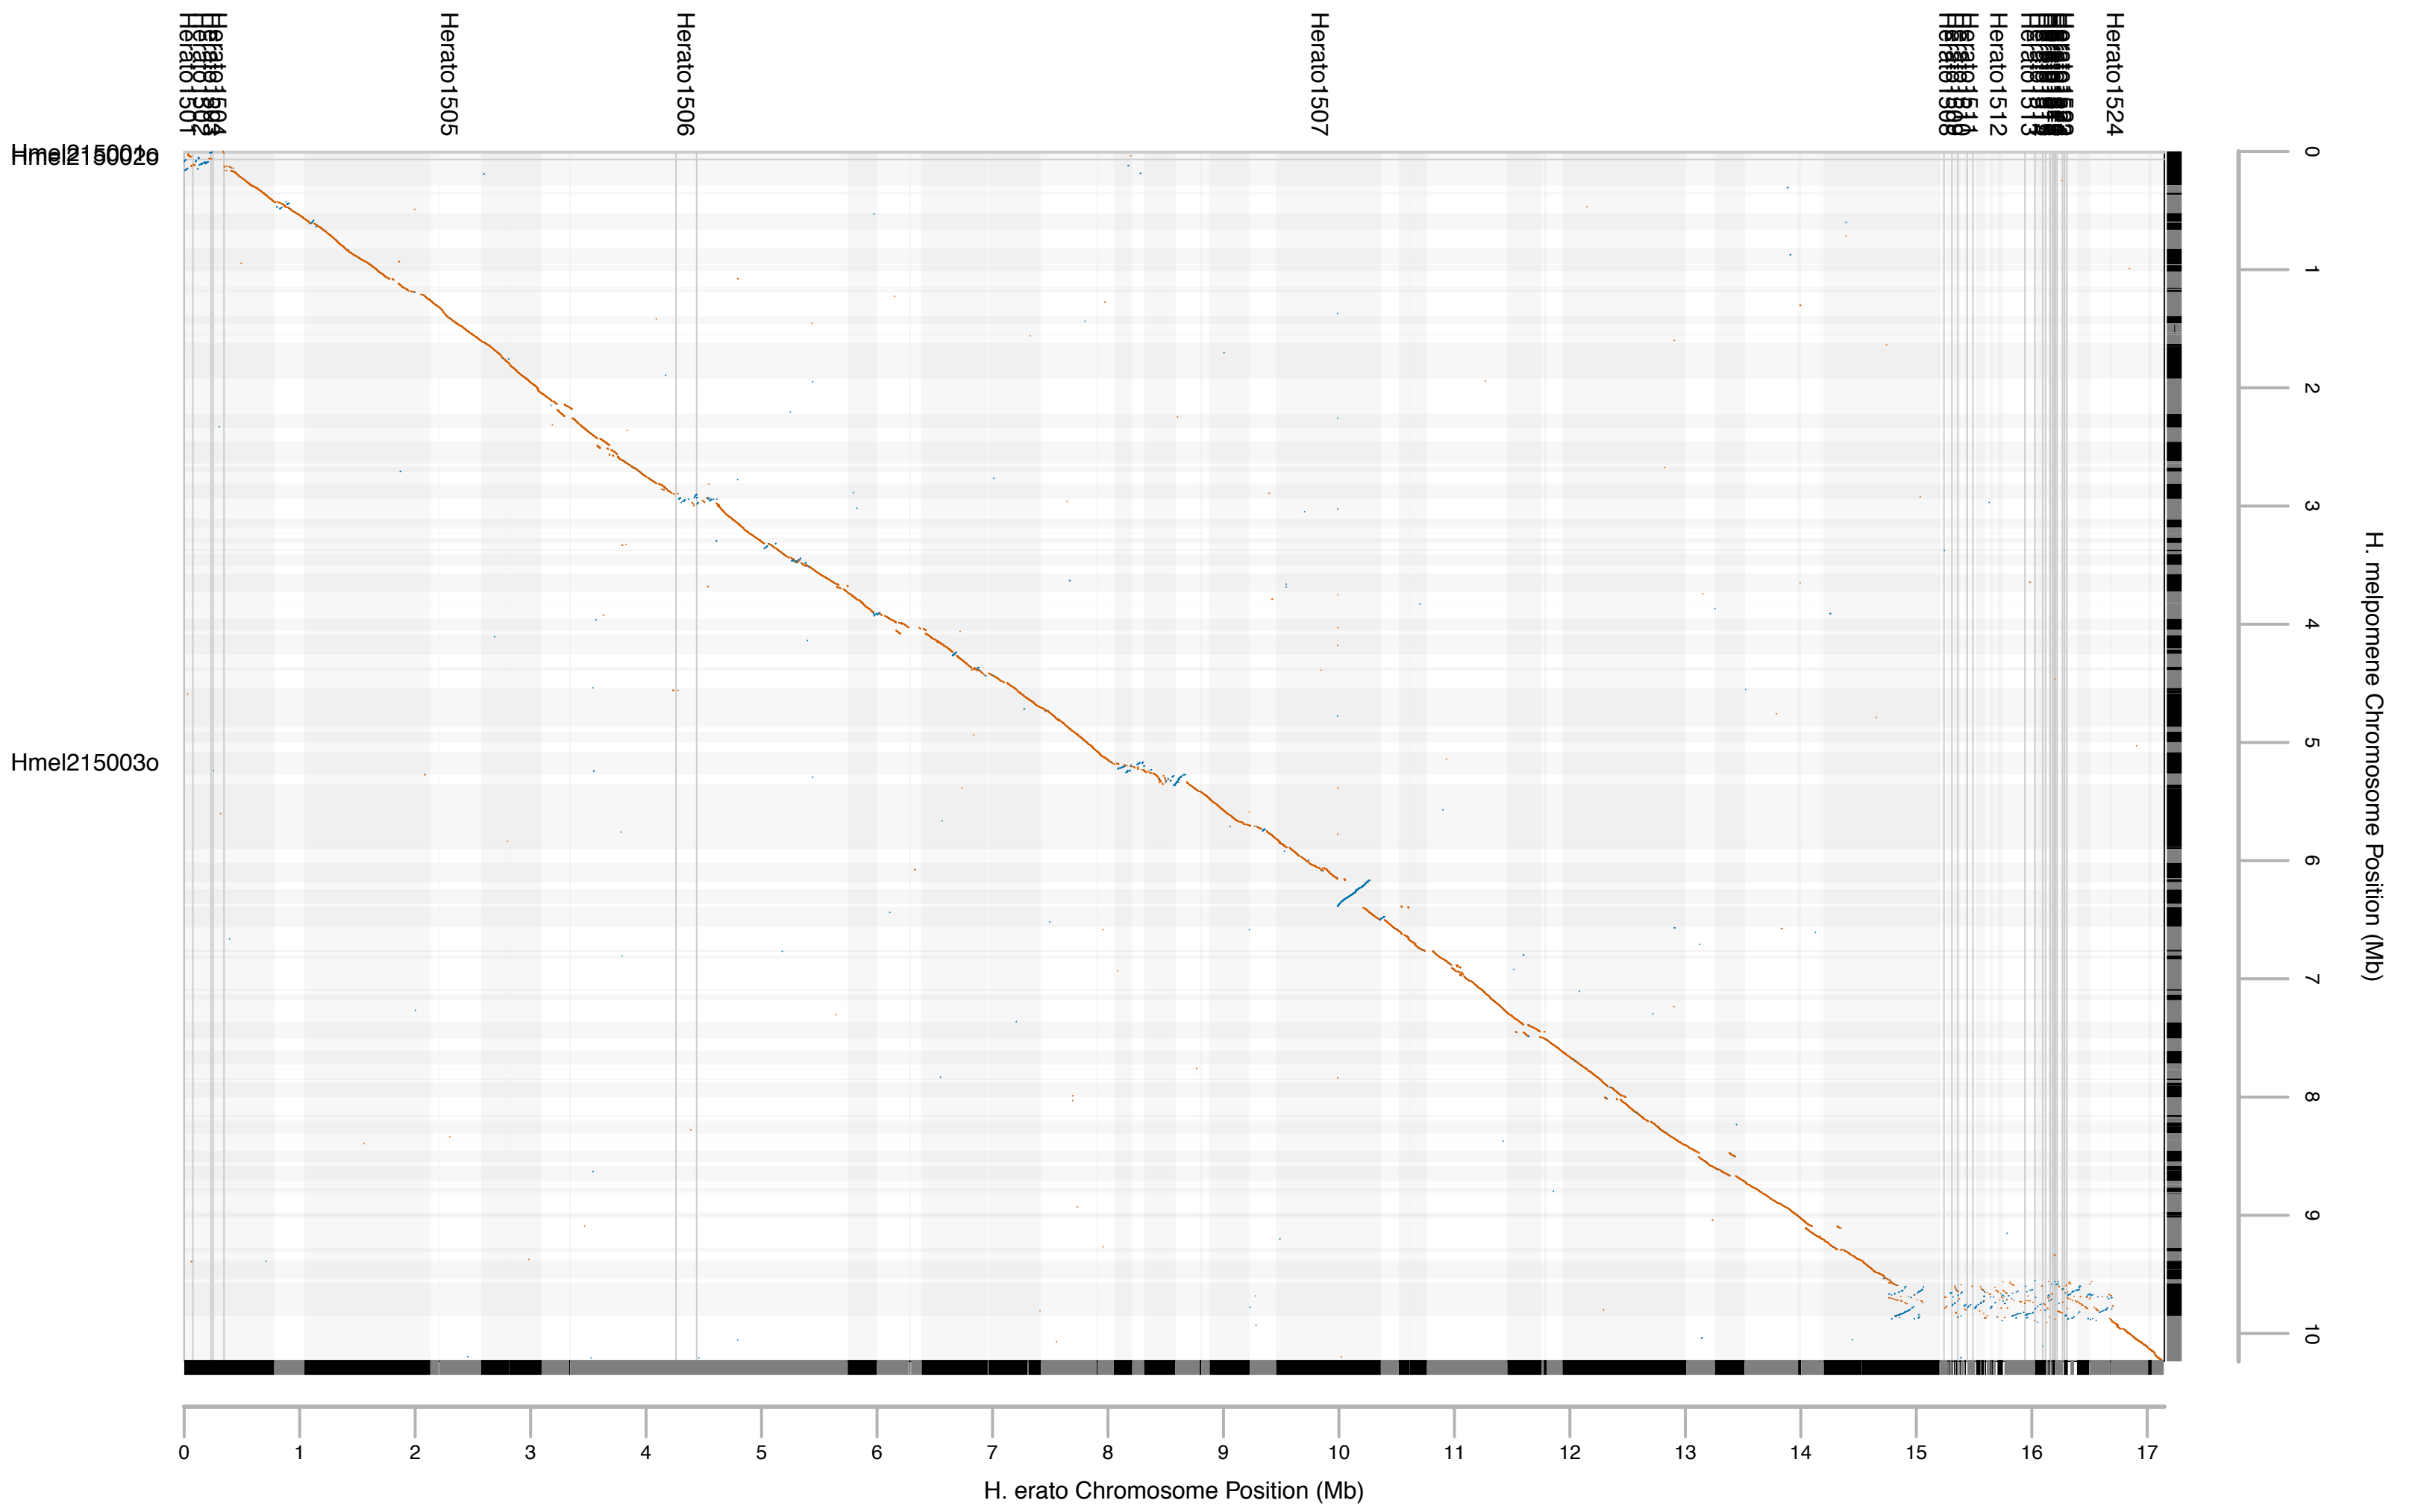

16

Hmel216001o

Hmel216002o

Herato1601

Herato1602

Herato1603

Herato1604

Herato1605

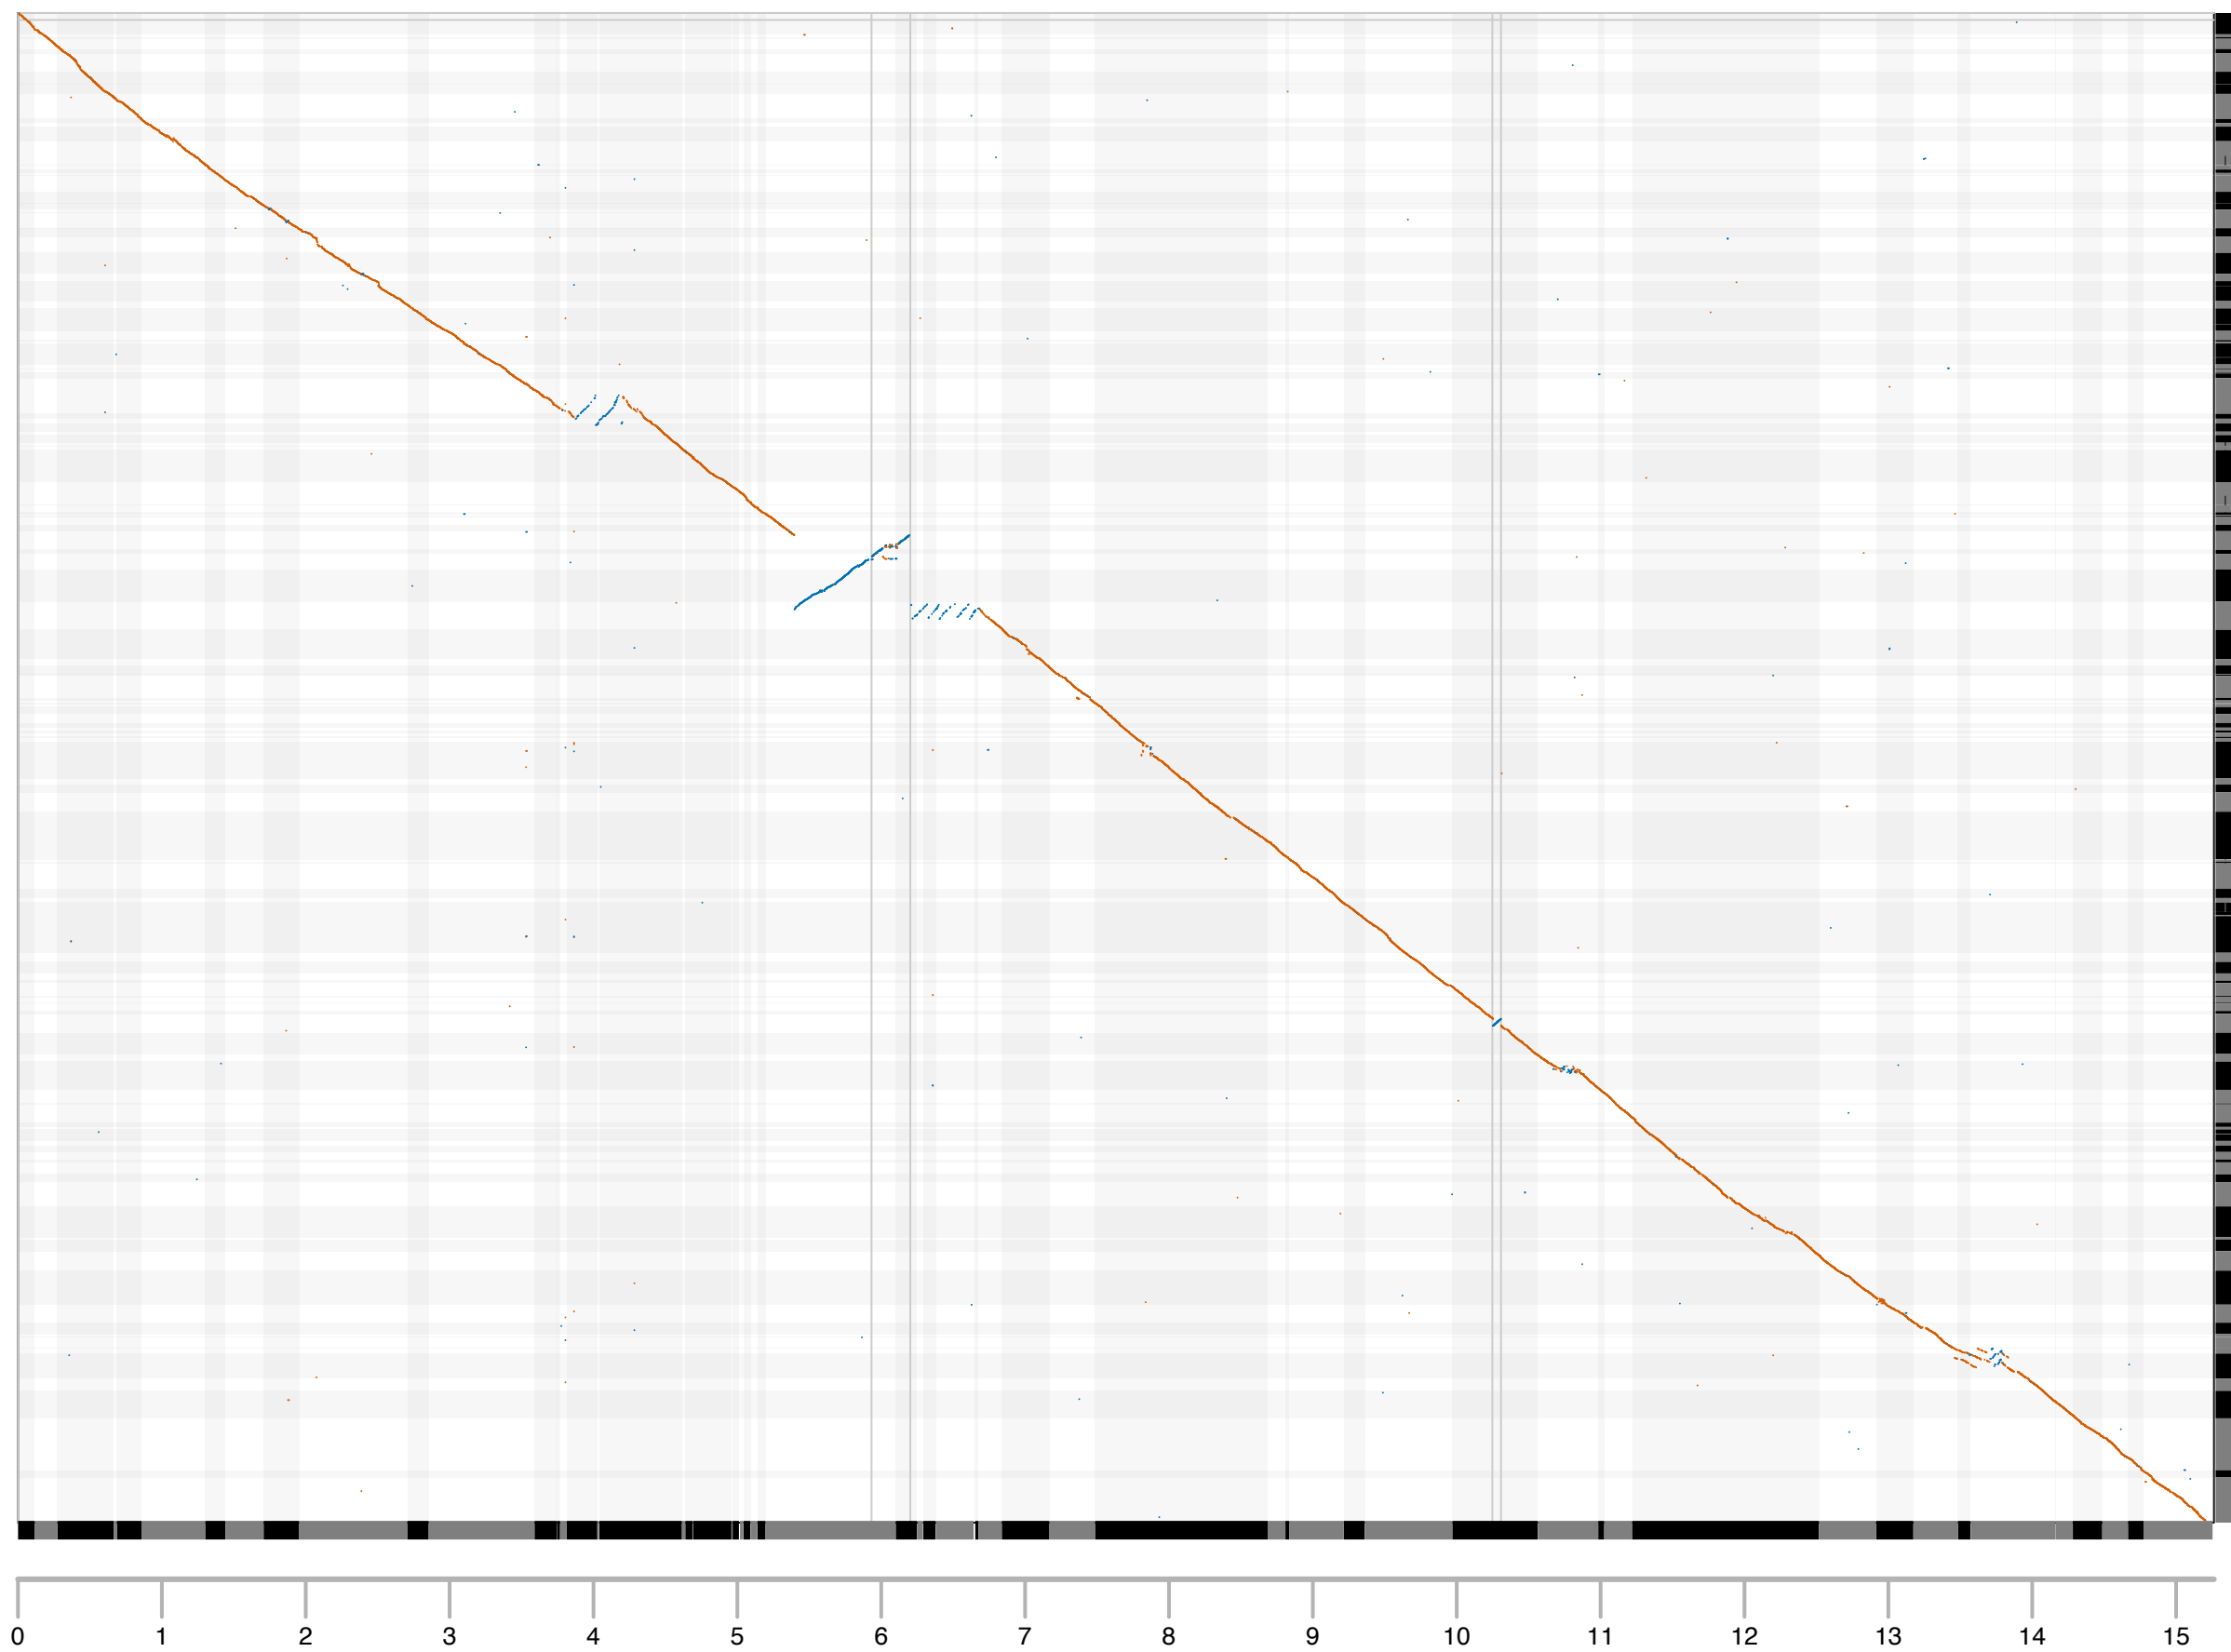

H. melipotene Chromosome Position (Mb)

H. erato Chromosome Position (Mb)



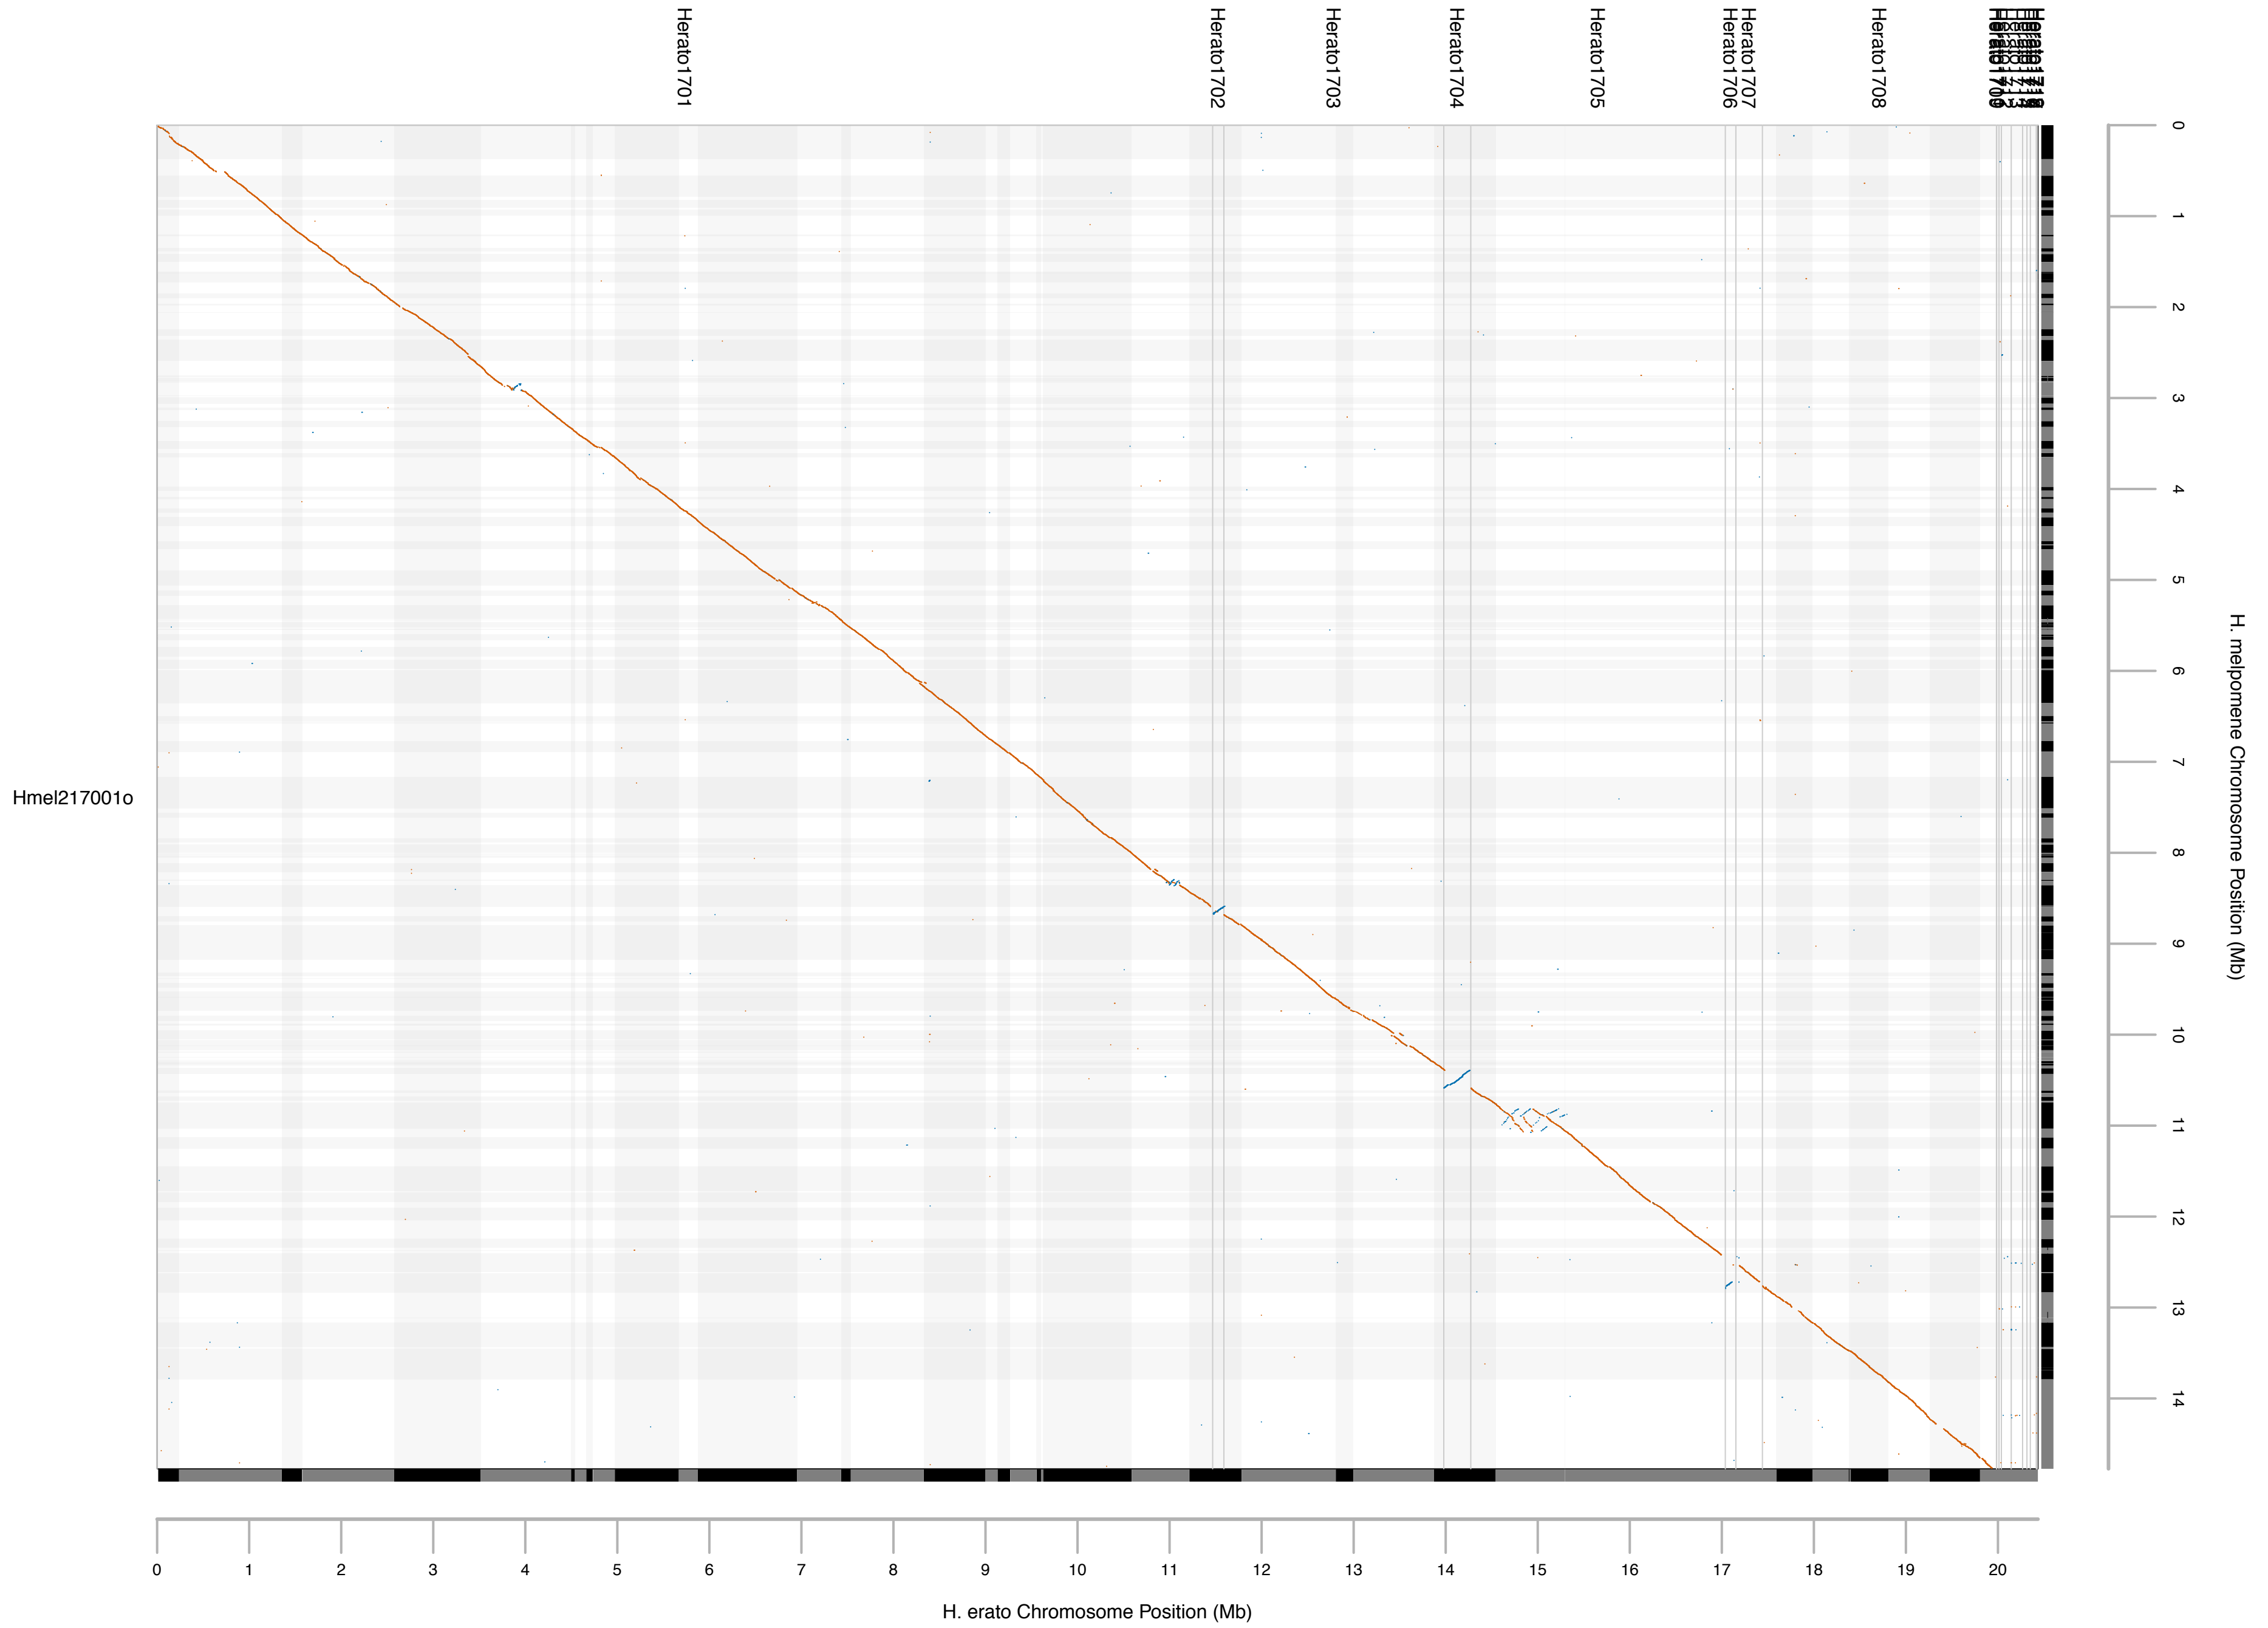

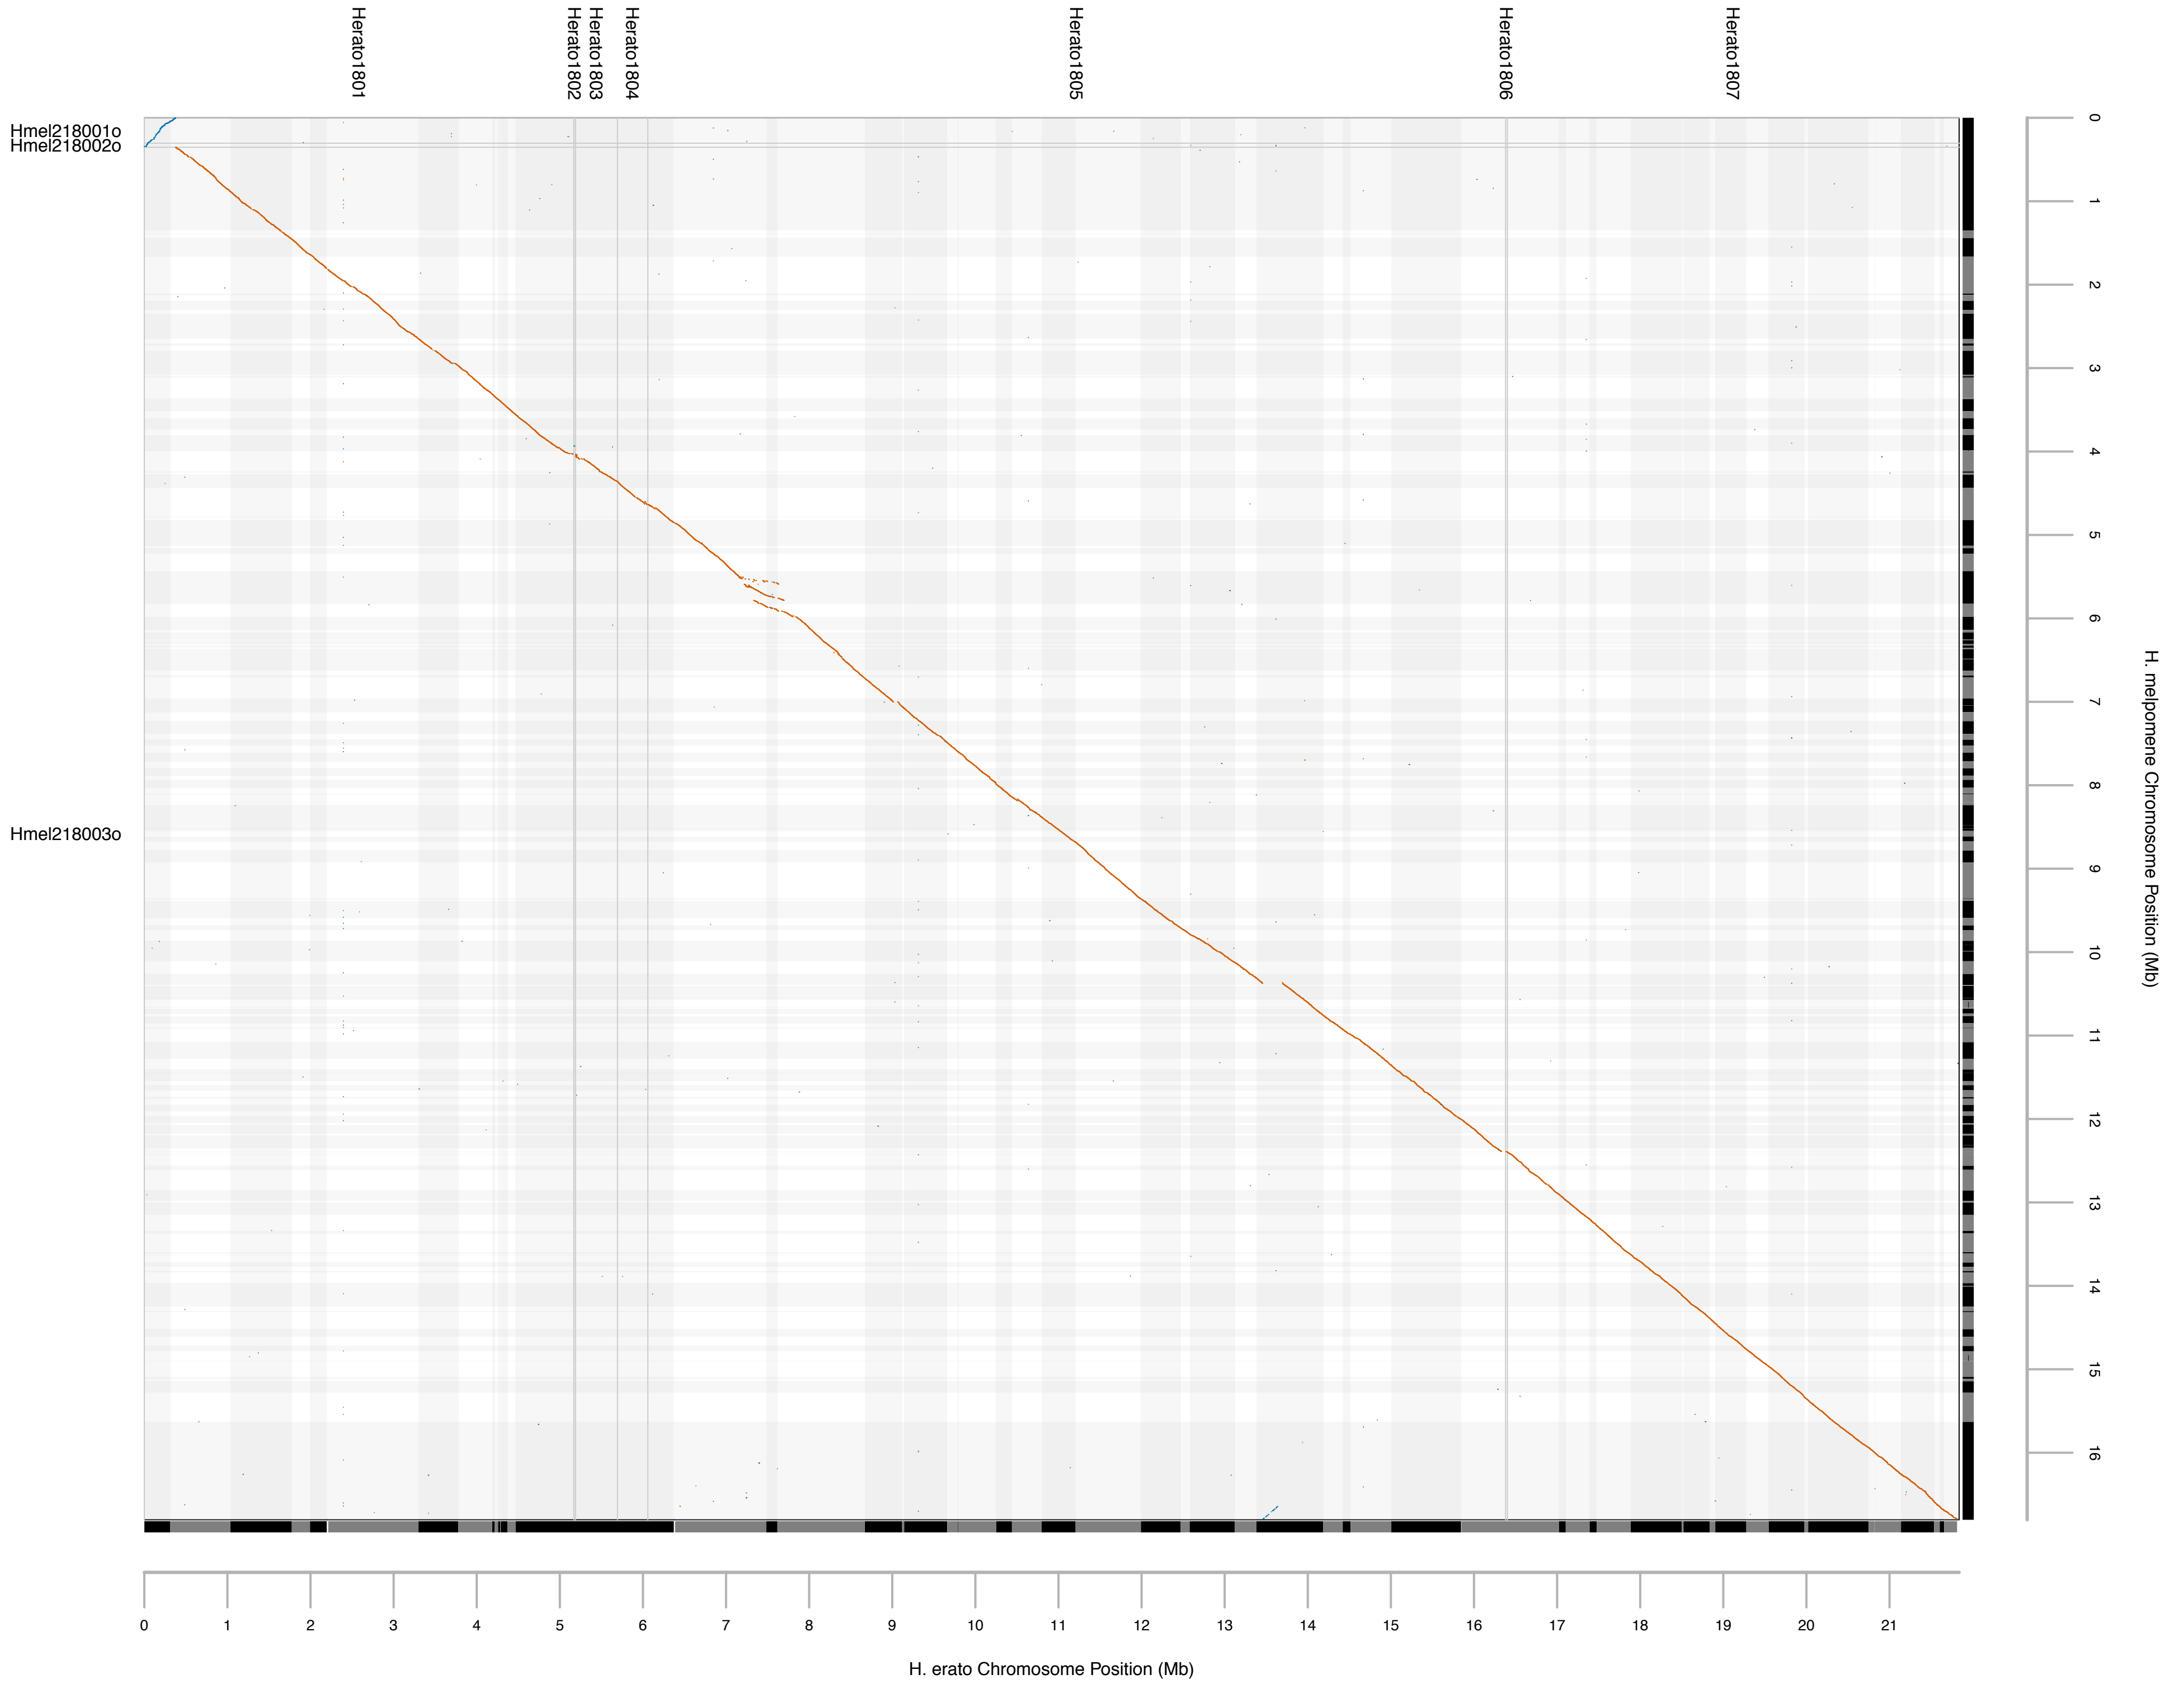

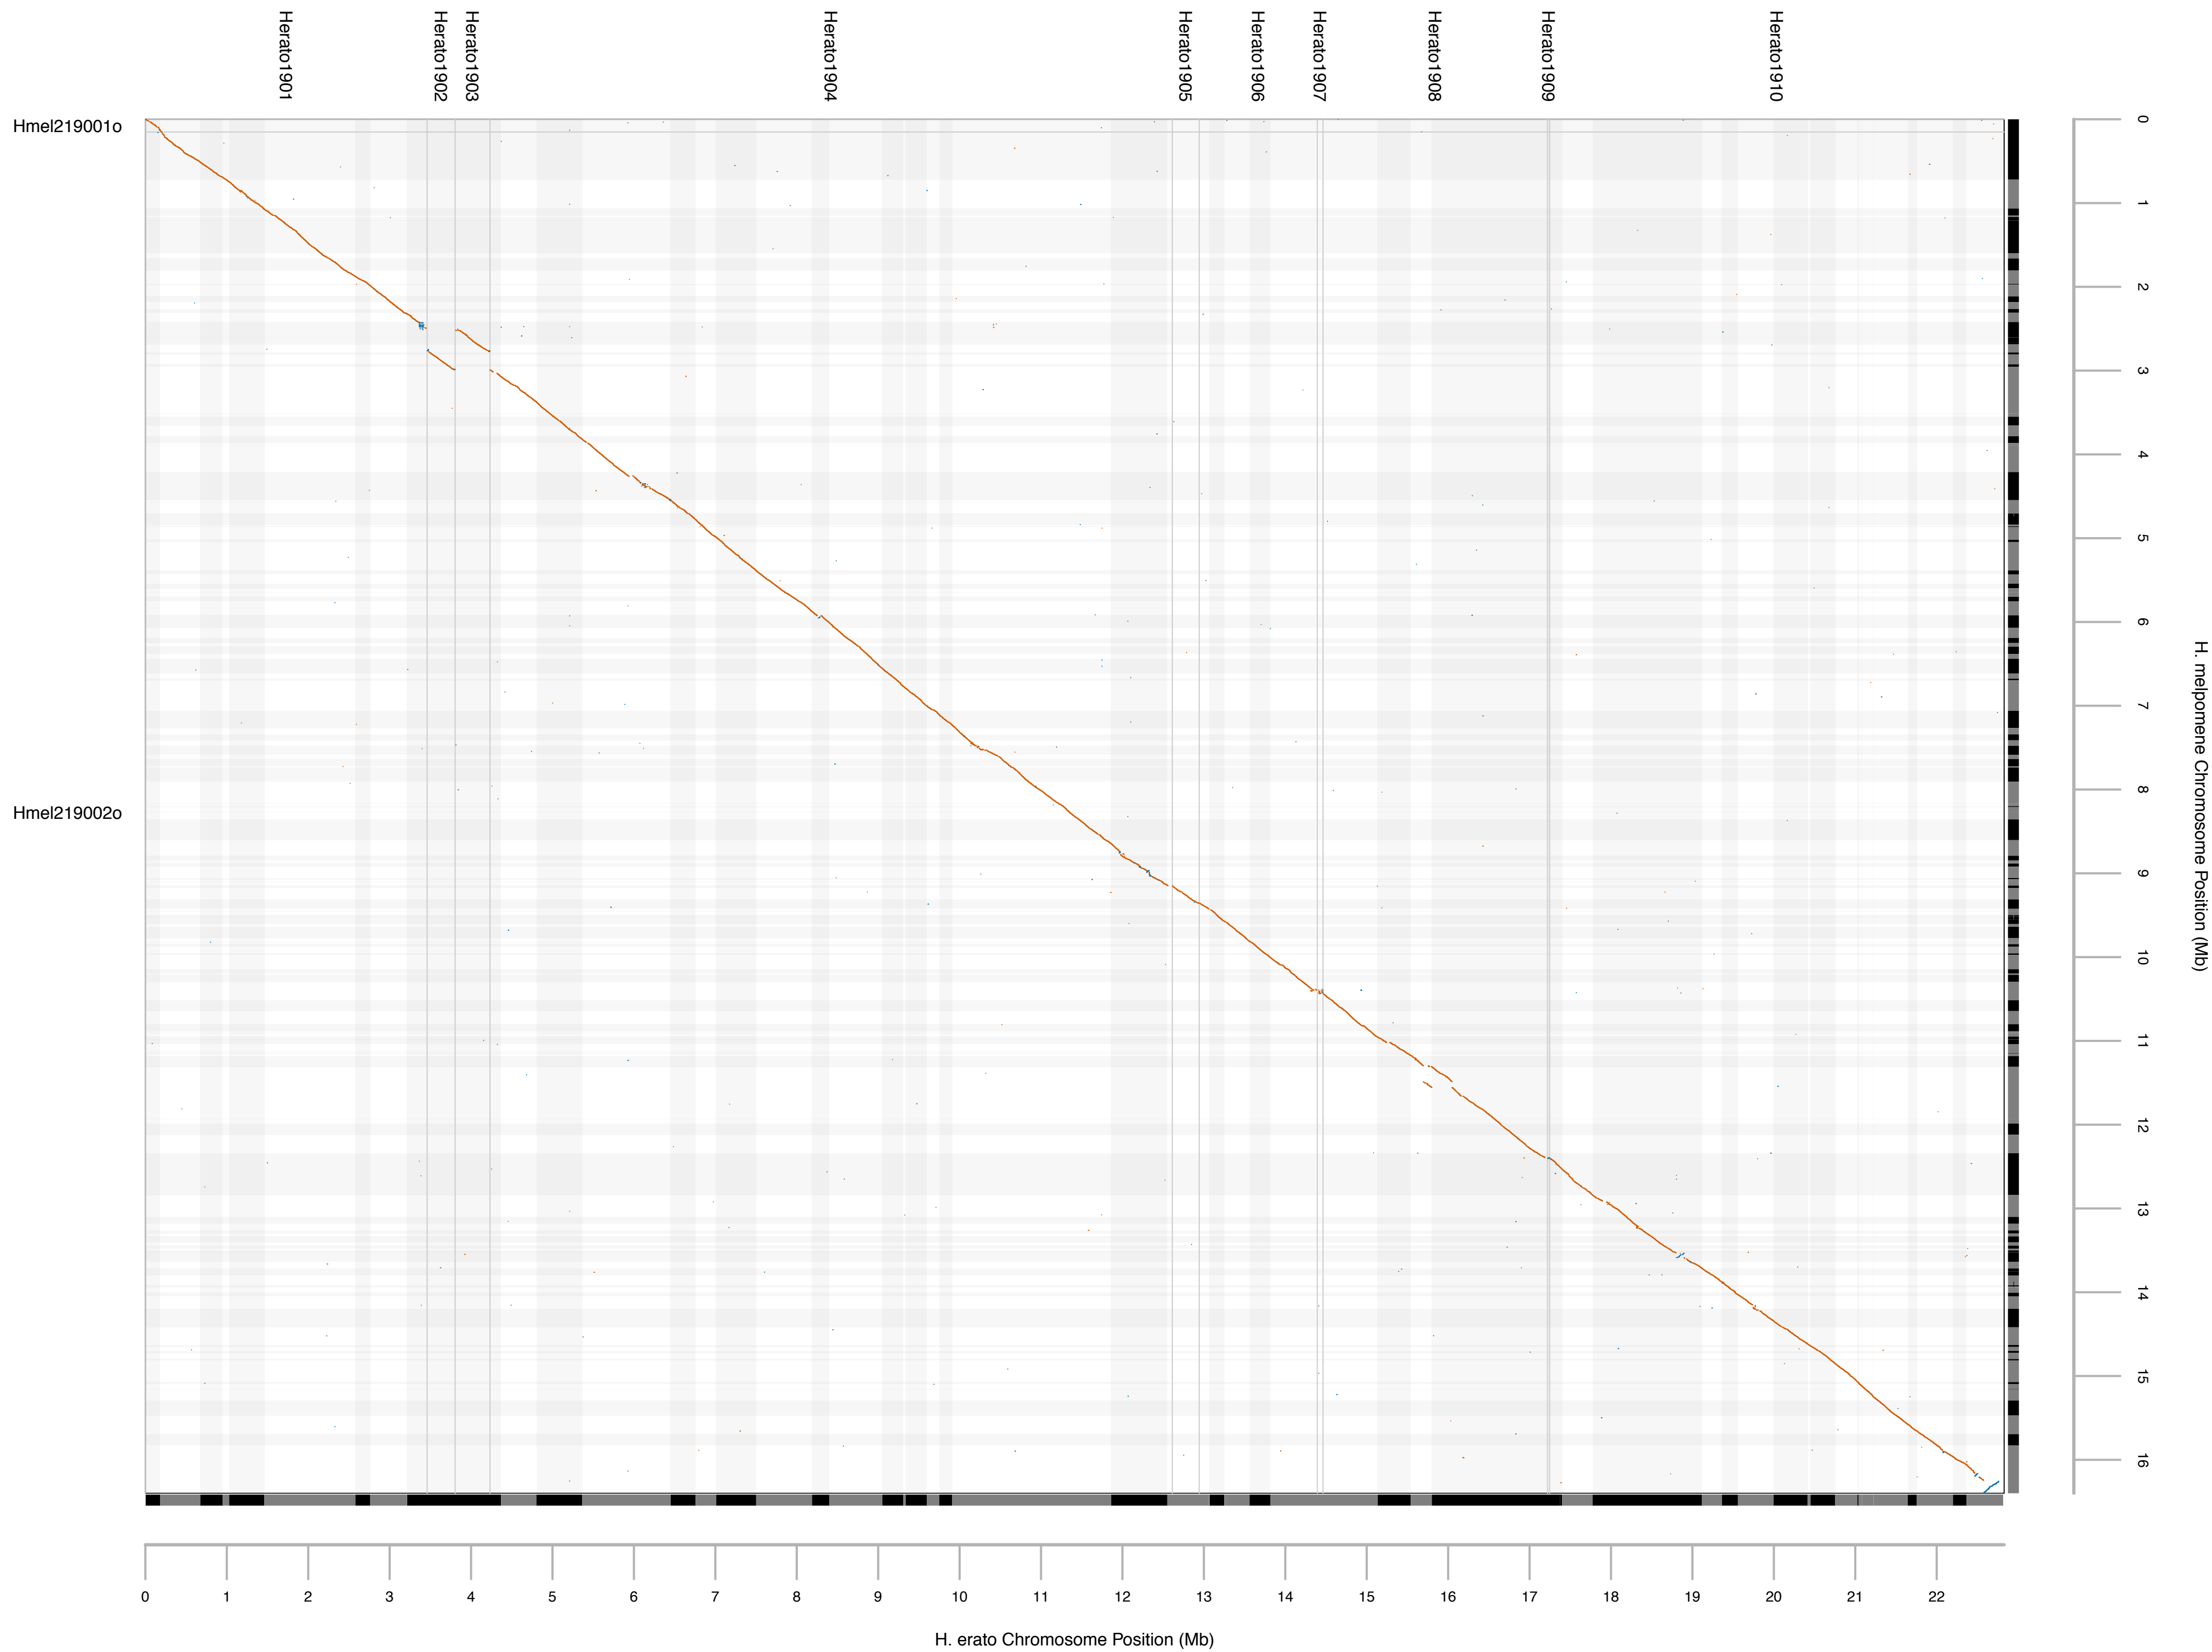

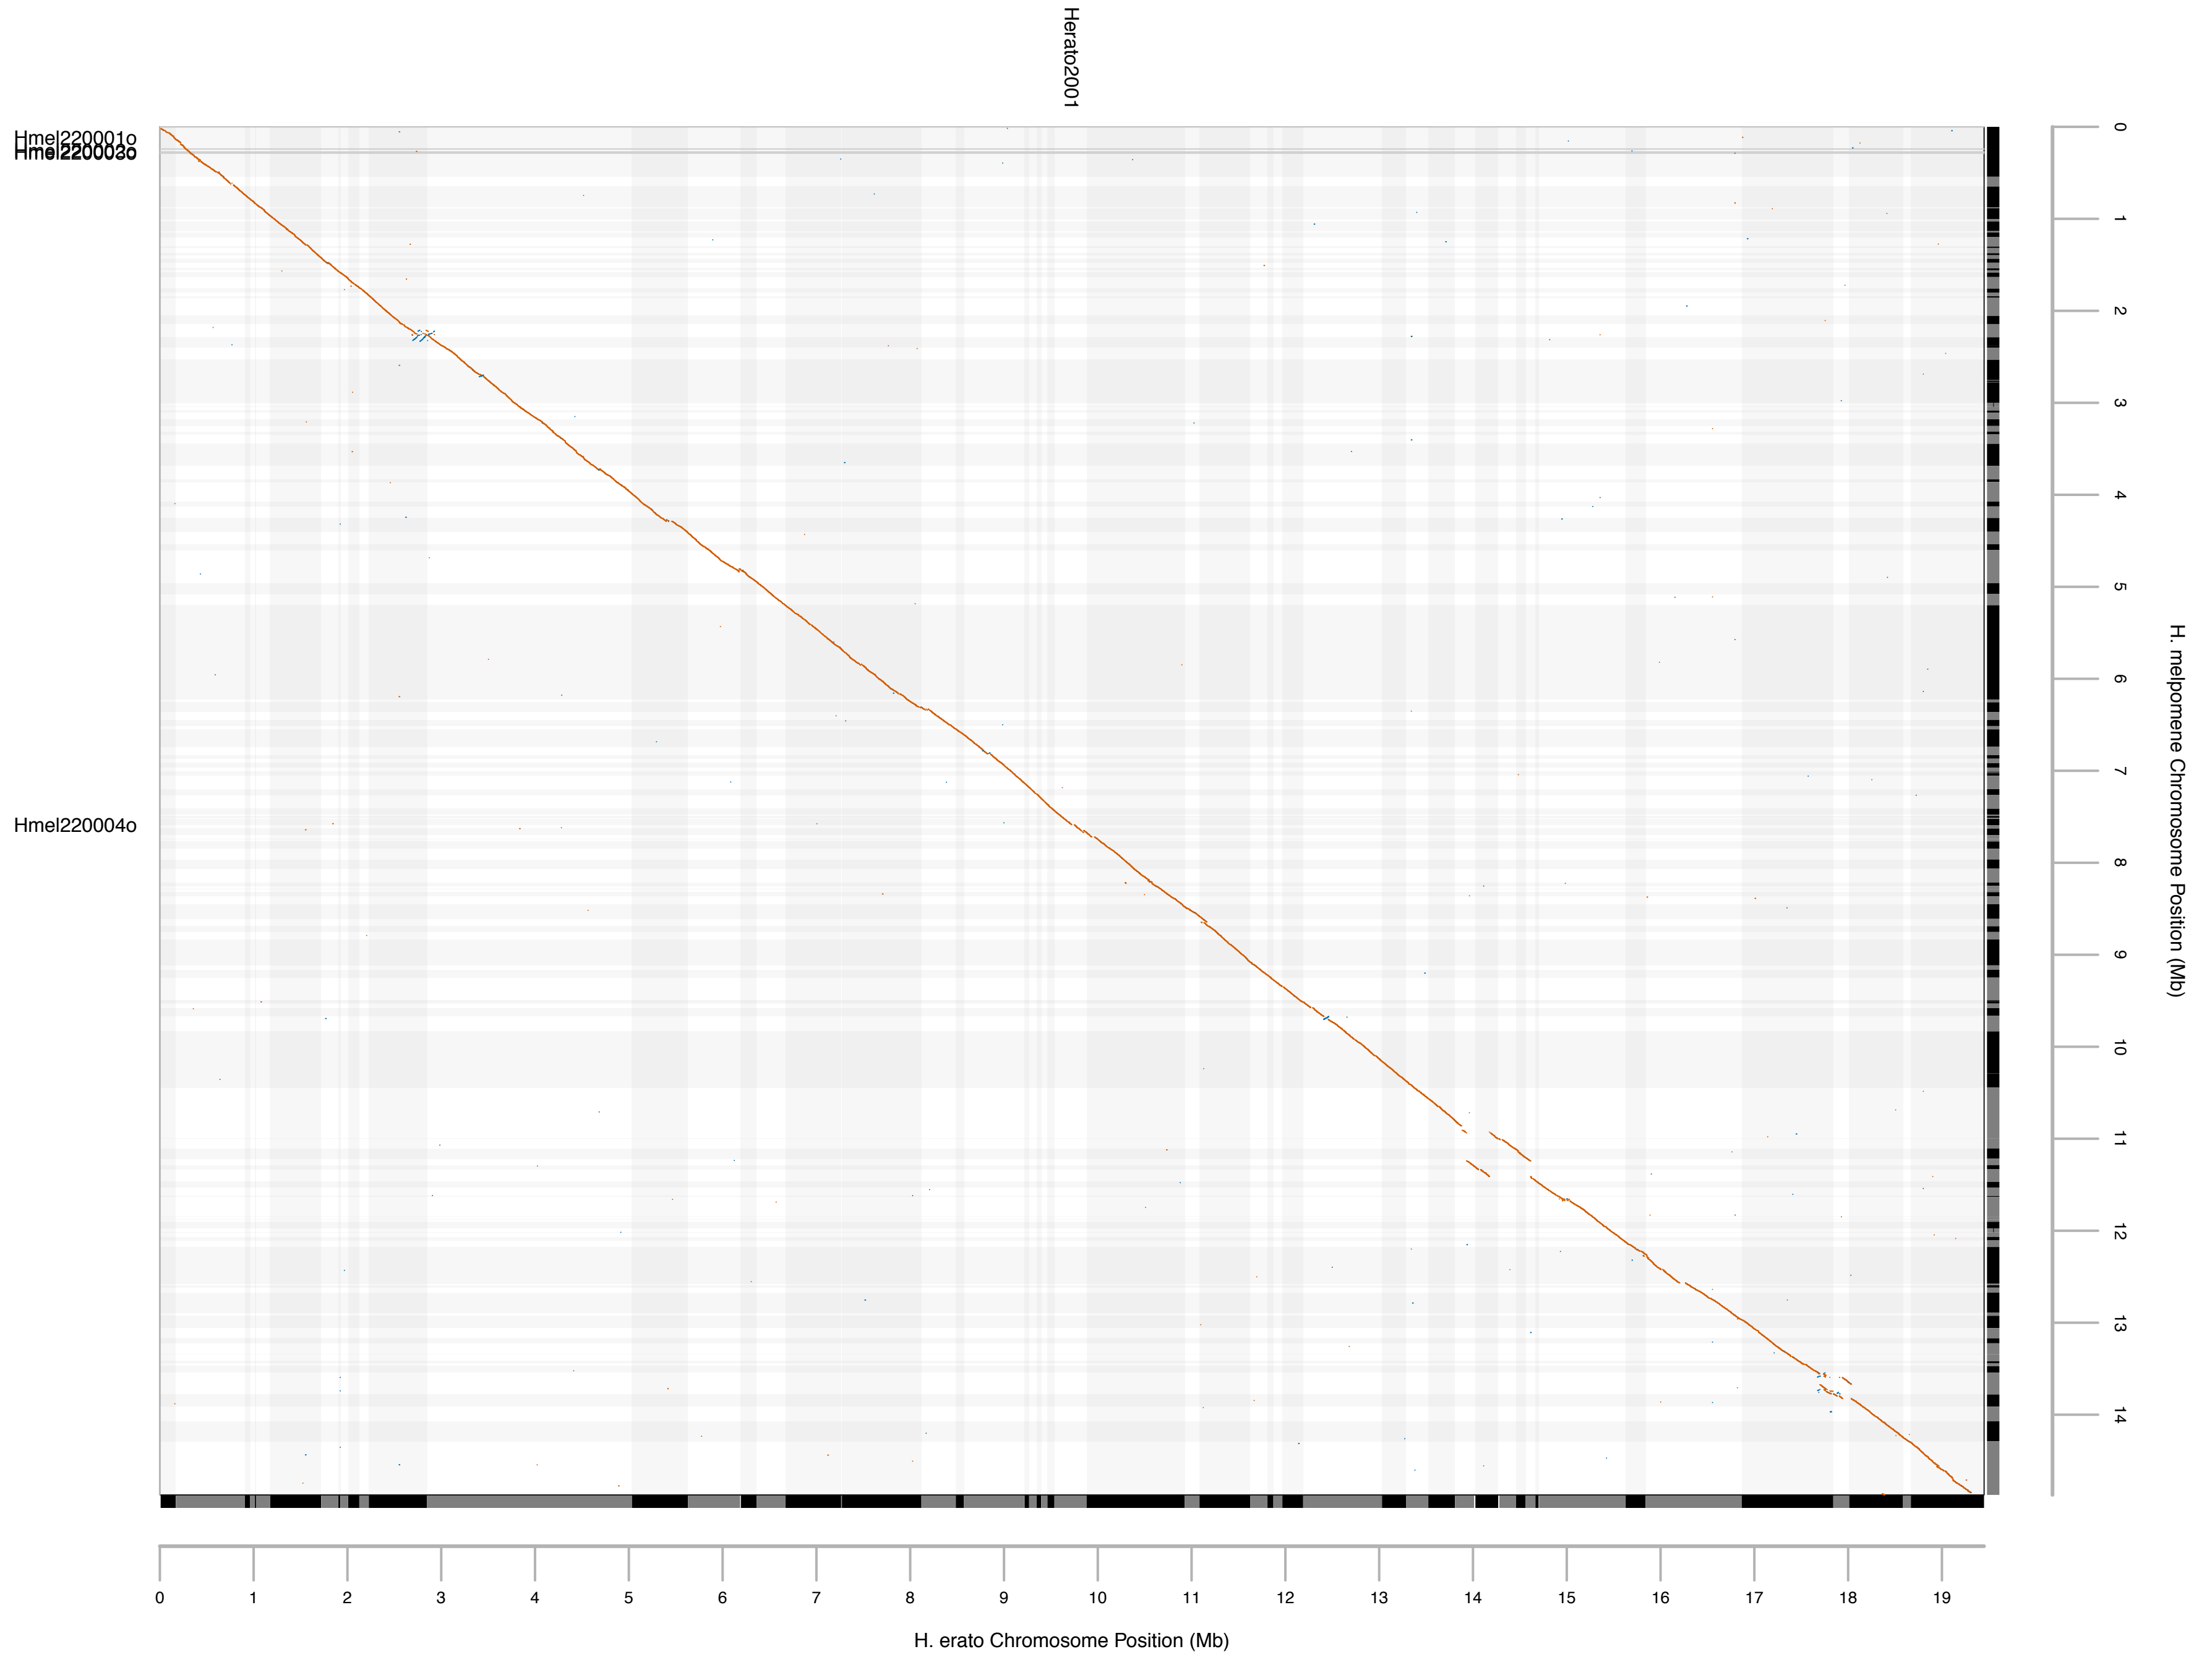

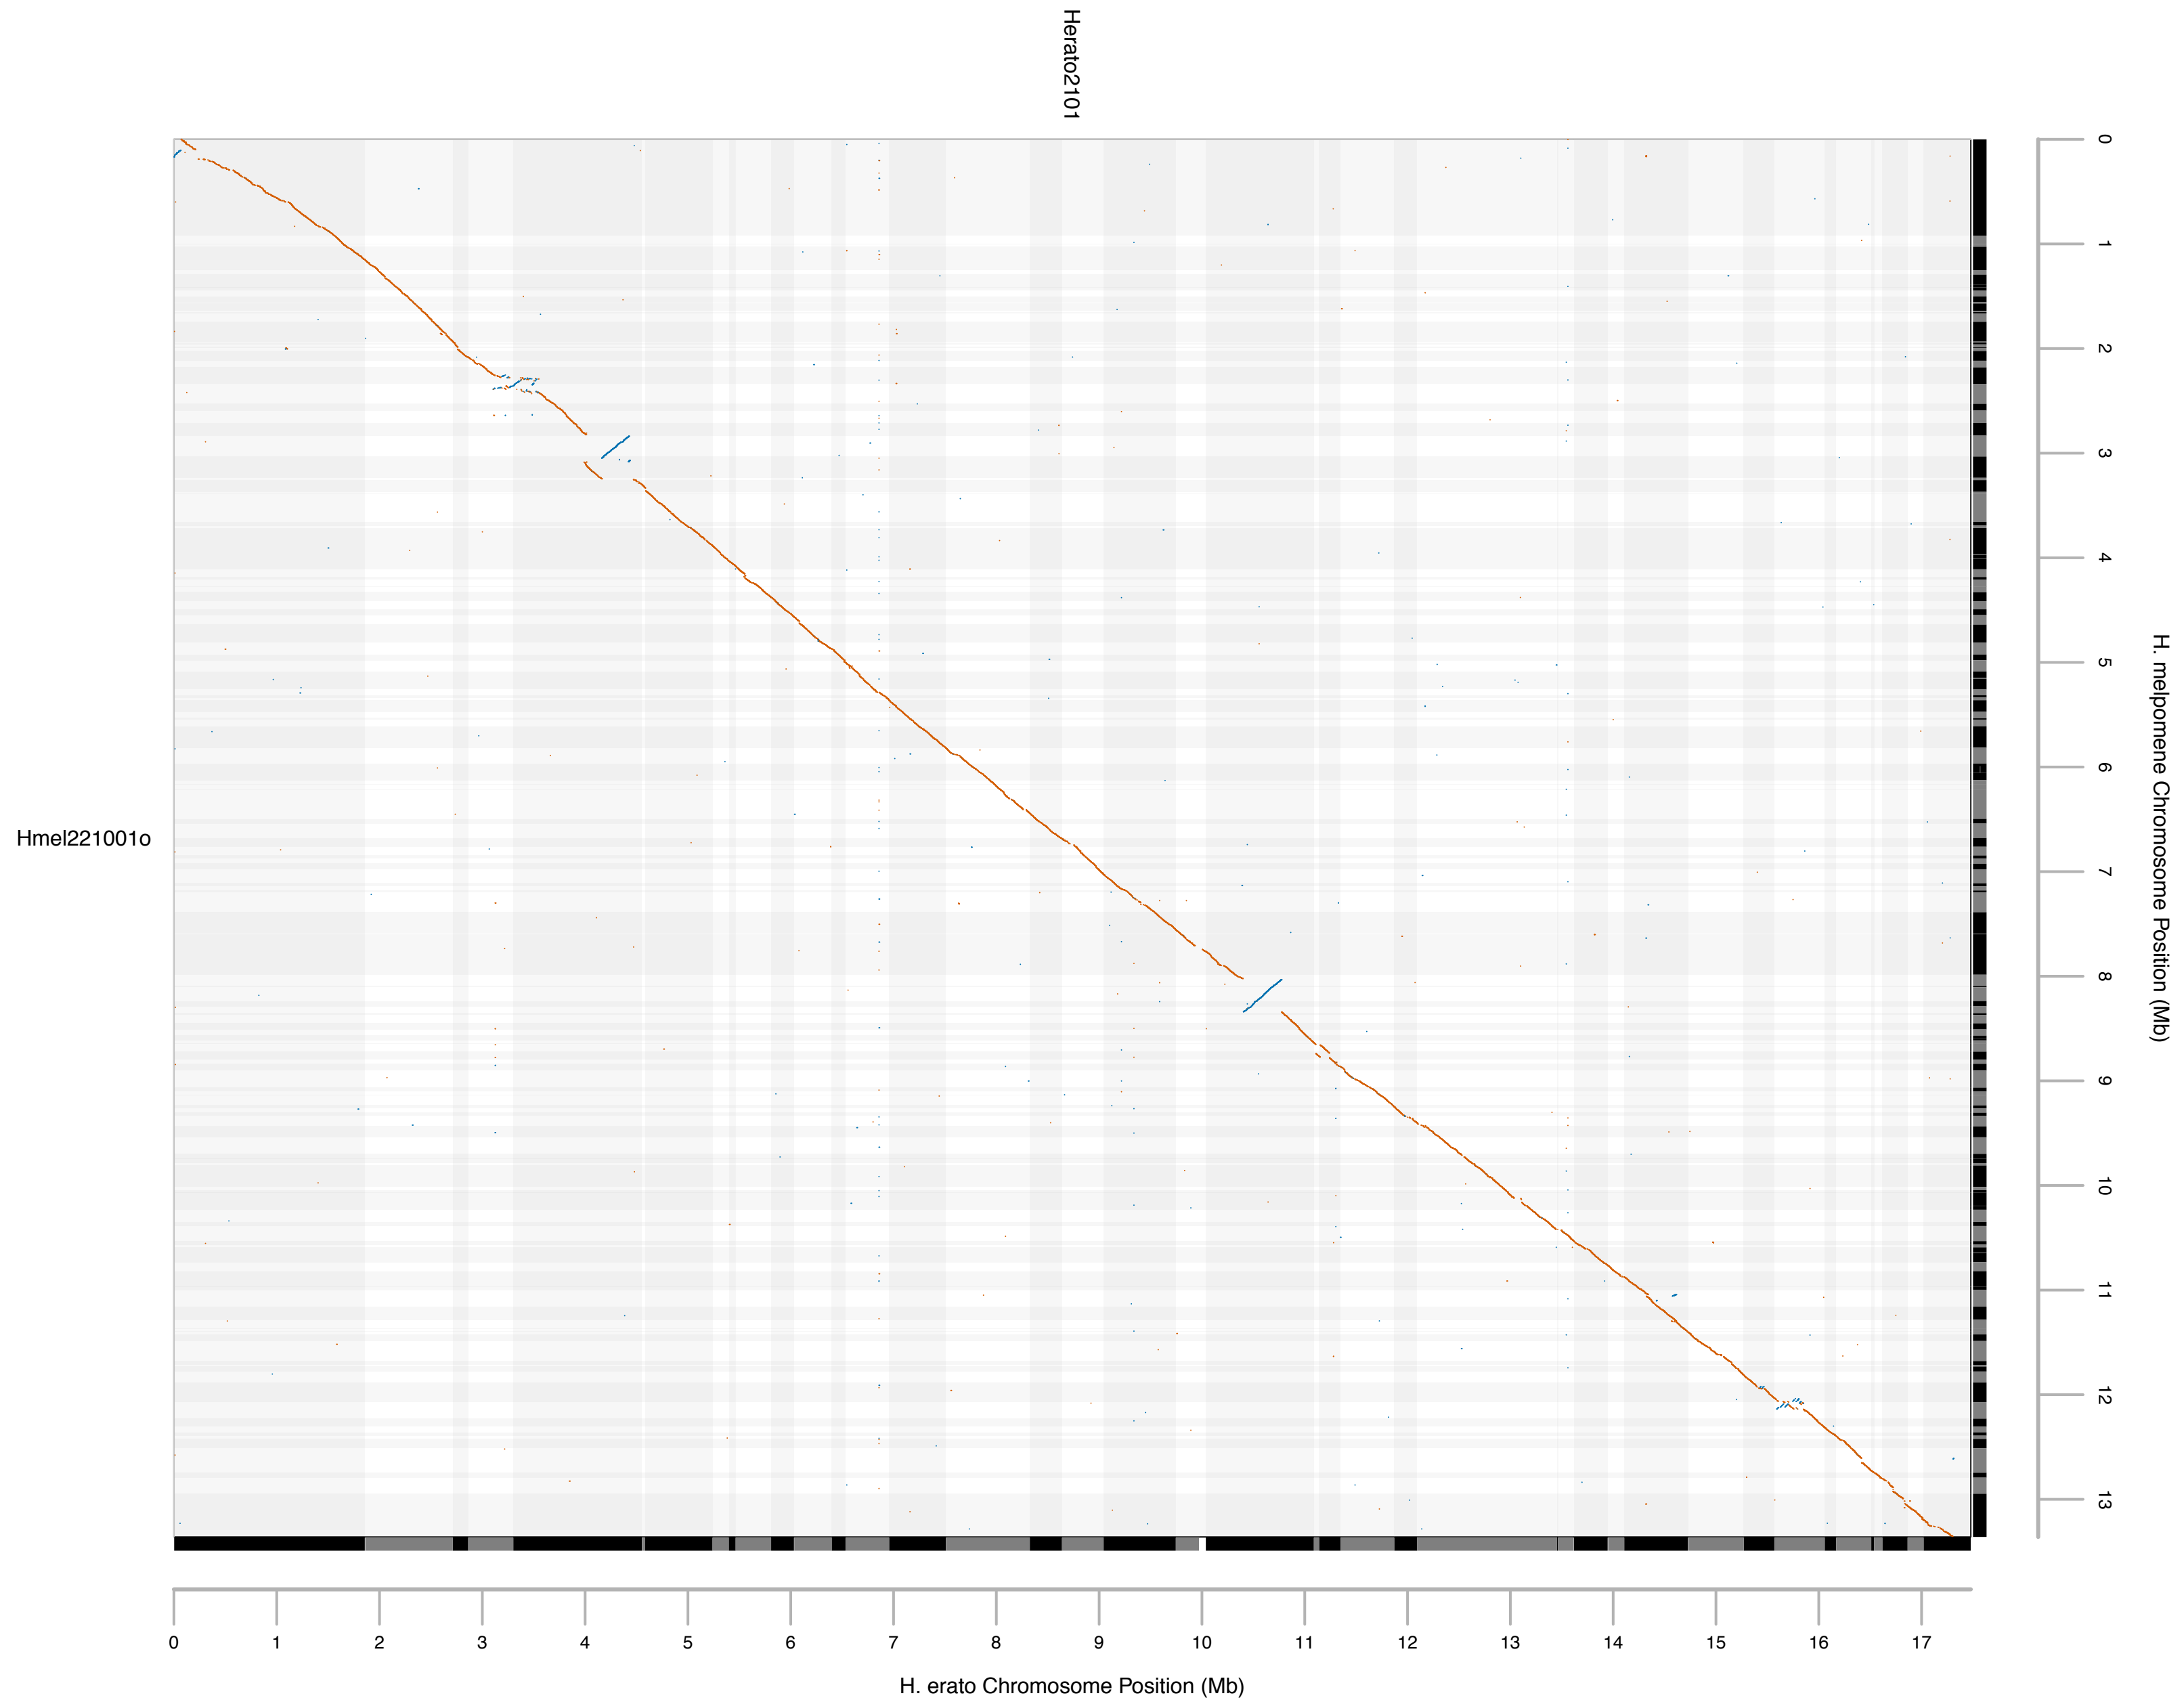

Supplement: Supplementary file [file 083931-15.pdf]
